# Supplementary material for: Mendelian Randomization and GWAS Meta Analysis Revealed the Risk-Increasing Effect of Schizophrenia on Cancers
Source: Biology (Basel). 2022 Sep 12;11(9):1345. doi: 10.3390/biology11091345 (PMC9495962; doi:10.3390/biology11091345)
Supplement: Supplementary file 1 [file biology-11-01345-s001.zip]

Archive with 11 entries (11 files):
- Diagram legends.pdf
- Figure S1.pdf
- Figure S2.pdf
- Figure S3.pdf
- Figure S4.pdf
- Figure S5.pdf
- Table S1 cancer data detail.xlsx
- Table S2 varian_f.xlsx
- Table S3 all cancer and scz mR.xlsx
- Table S4 scz and brca MR.xlsx
- Table S5 scz and other type cancers mr.xlsx
