# Supplementary material for: Mendelian Randomization and GWAS Meta Analysis Revealed the Risk-Increasing Effect of Schizophrenia on Cancers
Source: Biology (Basel). 2022 Sep 12;11(9):1345. doi: 10.3390/biology11091345 (PMC9495962; doi:10.3390/biology11091345)
Supplement: Supplementary file 1 [file biology-11-01345-s001.zip › Figure S1.pdf]

A

|                             |       |
|-----------------------------|-------|
| #Genomic risk loci          | 109   |
| #lead SNPs                  | 142   |
| #Ind. Sig. SNPs             | 413   |
| #candidate SNPs             | 24278 |
| #candidate GWAS tagged SNPs | 11055 |
| #mapped genes               | 545   |

B

|                             |       |
|-----------------------------|-------|
| #Genomic risk loci          | 227   |
| #lead SNPs                  | 465   |
| #Ind. Sig. SNPs             | 1596  |
| #candidate SNPs             | 44801 |
| #candidate GWAS tagged SNPs | 24111 |
| #mapped genes               | 817   |

C

|                             |       |
|-----------------------------|-------|
| #Genomic risk loci          | 778   |
| #lead SNPs                  | 865   |
| #Ind. Sig. SNPs             | 1076  |
| #candidate SNPs             | 56609 |
| #candidate GWAS tagged SNPs | 7977  |
| #mapped genes               | 1168  |
