# Supplementary material for: Mendelian Randomization and GWAS Meta Analysis Revealed the Risk-Increasing Effect of Schizophrenia on Cancers
Source: Biology (Basel). 2022 Sep 12;11(9):1345. doi: 10.3390/biology11091345 (PMC9495962; doi:10.3390/biology11091345)
Supplement: Supplementary file 1 [file biology-11-01345-s001.zip › Table S1 cancer data detail.xlsx]

## Sheet: Sheet1
Table S1. The information of 13 cancers data
Datasets num	Cancer name	Samples size	ncase	population	pubmedID
ieu-a-1126	Breast cancer	228951	122977	European	29059683
ieu-a-1120	Ovarian cancer	66450	25509	European	28346442
ieu-a-1082	Thyroid cancer	1080	649	European	23894154
ieu-a-822	Pancreatic cancer	3835	1896	European	19648918
ieu-a-816	Neuroblastoma	4881	1627	European	23222812
ieu-a-1057	Gallbladder cancer	907	41	East Asian	22318345
ieu-a-1013	Glioma	6811	1856	European	22886559
ieu-a-966	Lung cancer	27209	11348	European	24880342
ieu-b-85	Prostate cancer	140254	79148	European	29892016
ieu-b-90	Oral cavity and pharyngeal cancer	4671	2342	European	27749845
ukb-b-16713	Secondary malignant neoplasm of liver	463010	1139	European	NA
ukb-b-20145	Colon cancer	462933	1494	European	NA
ukb-b-19425	Rectum cancer	463010	1085	European	NA
