# Supplementary material for: Mendelian Randomization and GWAS Meta Analysis Revealed the Risk-Increasing Effect of Schizophrenia on Cancers
Source: Biology (Basel). 2022 Sep 12;11(9):1345. doi: 10.3390/biology11091345 (PMC9495962; doi:10.3390/biology11091345)
Supplement: Supplementary file 1 [file biology-11-01345-s001.zip › Table S2 varian_f.xlsx]

## Sheet: varian_f
SNP	effect_allele.exposure	other_allele.exposure	effect_allele.outcome	other_allele.outcome	beta.exposure	beta.outcome	eaf.exposure	eaf.outcome	remove	palindromic	ambiguous	id.outcome	chr	pos	se.outcome	samplesize.outcome	pval.outcome	outcome	originalname.outcome	outcome.deprecated	mr_keep.outcome	data_source.outcome	chr.exposure	pos.exposure	se.exposure	pval.exposure	samplesize.exposure	id.exposure	exposure	mr_keep.exposure	pval_origin.exposure	data_source.exposure	action	mr_keep	variance	f
rs10108725	T	C	T	C	0.073204	0.0172	0.222	0.2145	FALSE	FALSE	FALSE	ieu-a-1126	8	4191202	0.0079	228951	0.0289301	Breast cancer (Combined Oncoarray; iCOGS; GWAS meta analysis) || id:ieu-a-1126	Breast cancer (Combined Oncoarray; iCOGS; GWAS meta analysis)	Breast cancer (Combined Oncoarray; iCOGS; GWAS meta analysis) || ||	TRUE	igd	8	4191202	0.0133	3.32e-08	77096	ieu-b-42	schizophrenia || id:ieu-b-42	TRUE	reported	igd	2	TRUE	0.000392793	30.2939
rs10791097	G	T	G	T	-0.0766	-0.0019	0.52	0.5416	FALSE	FALSE	FALSE	ieu-a-1126	11	130718630	0.0065	228951	0.774901	Breast cancer (Combined Oncoarray; iCOGS; GWAS meta analysis) || id:ieu-a-1126	Breast cancer (Combined Oncoarray; iCOGS; GWAS meta analysis)	Breast cancer (Combined Oncoarray; iCOGS; GWAS meta analysis) || ||	TRUE	igd	11	130718630	0.0109	2.05e-12	77096	ieu-b-42	schizophrenia || id:ieu-b-42	TRUE	reported	igd	2	TRUE	0.000640169	49.3848
rs11027857	A	G	A	G	0.063998	-0.0057	0.587	0.5159	FALSE	FALSE	FALSE	ieu-a-1126	11	24403620	0.0065	228951	0.3862	Breast cancer (Combined Oncoarray; iCOGS; GWAS meta analysis) || id:ieu-a-1126	Breast cancer (Combined Oncoarray; iCOGS; GWAS meta analysis)	Breast cancer (Combined Oncoarray; iCOGS; GWAS meta analysis) || ||	TRUE	igd	11	24403620	0.0109	3.67e-09	77096	ieu-b-42	schizophrenia || id:ieu-b-42	TRUE	reported	igd	2	TRUE	0.000446945	34.4722
rs1106568	A	G	A	G	-0.069404	-0.0127	0.744	0.7563	FALSE	FALSE	FALSE	ieu-a-1126	4	176861301	0.0072	228951	0.0770495	Breast cancer (Combined Oncoarray; iCOGS; GWAS meta analysis) || id:ieu-a-1126	Breast cancer (Combined Oncoarray; iCOGS; GWAS meta analysis)	Breast cancer (Combined Oncoarray; iCOGS; GWAS meta analysis) || ||	TRUE	igd	4	176861301	0.0125	2.85e-08	77096	ieu-b-42	schizophrenia || id:ieu-b-42	TRUE	reported	igd	2	TRUE	0.000399709	30.8275
rs111294930	G	A	G	A	-0.087699	-0.0015	0.219	0.2881	FALSE	FALSE	FALSE	ieu-a-1126	5	152177121	0.0069	228951	0.8294	Breast cancer (Combined Oncoarray; iCOGS; GWAS meta analysis) || id:ieu-a-1126	Breast cancer (Combined Oncoarray; iCOGS; GWAS meta analysis)	Breast cancer (Combined Oncoarray; iCOGS; GWAS meta analysis) || ||	TRUE	igd	5	152177121	0.0143	9.29e-10	77096	ieu-b-42	schizophrenia || id:ieu-b-42	TRUE	reported	igd	2	TRUE	0.000487611	37.6102
rs11139497	A	T	A	T	0.0656	0.0002	0.336	0.3125	FALSE	TRUE	FALSE	ieu-a-1126	9	84739941	0.0068	228951	0.9719	Breast cancer (Combined Oncoarray; iCOGS; GWAS meta analysis) || id:ieu-a-1126	Breast cancer (Combined Oncoarray; iCOGS; GWAS meta analysis)	Breast cancer (Combined Oncoarray; iCOGS; GWAS meta analysis) || ||	TRUE	igd	9	84739941	0.0118	2.65e-08	77096	ieu-b-42	schizophrenia || id:ieu-b-42	TRUE	reported	igd	2	TRUE	0.000400717	30.9053
rs11210892	A	G	A	G	-0.067797	0.0117	0.652	0.6801	FALSE	FALSE	FALSE	ieu-a-1126	1	44100084	0.0068	228951	0.0870202	Breast cancer (Combined Oncoarray; iCOGS; GWAS meta analysis) || id:ieu-a-1126	Breast cancer (Combined Oncoarray; iCOGS; GWAS meta analysis)	Breast cancer (Combined Oncoarray; iCOGS; GWAS meta analysis) || ||	TRUE	igd	1	44100084	0.0115	3.42e-09	77096	ieu-b-42	schizophrenia || id:ieu-b-42	TRUE	reported	igd	2	TRUE	0.000450607	34.7547
rs113397282	C	T	C	T	-0.145	-0.0018	0.153	0.0659	FALSE	FALSE	FALSE	ieu-a-1126	6	32488050	0.0186	228951	0.9223	Breast cancer (Combined Oncoarray; iCOGS; GWAS meta analysis) || id:ieu-a-1126	Breast cancer (Combined Oncoarray; iCOGS; GWAS meta analysis)	Breast cancer (Combined Oncoarray; iCOGS; GWAS meta analysis) || ||	TRUE	igd	6	32488050	0.0176	1.8e-16	77096	ieu-b-42	schizophrenia || id:ieu-b-42	TRUE	reported	igd	2	TRUE	0.000879623	67.8734
rs11682175	C	T	C	T	0.073496	0.0001	0.439	0.4723	FALSE	FALSE	FALSE	ieu-a-1126	2	57987593	0.0062	228951	0.9915	Breast cancer (Combined Oncoarray; iCOGS; GWAS meta analysis) || id:ieu-a-1126	Breast cancer (Combined Oncoarray; iCOGS; GWAS meta analysis)	Breast cancer (Combined Oncoarray; iCOGS; GWAS meta analysis) || ||	TRUE	igd	2	57987593	0.0109	1.58e-11	77096	ieu-b-42	schizophrenia || id:ieu-b-42	TRUE	reported	igd	2	TRUE	0.000589368	45.4635
rs11693094	T	C	T	C	-0.073603	0.0001	0.429	0.46	FALSE	FALSE	FALSE	ieu-a-1126	2	185601420	0.0063	228951	0.9886	Breast cancer (Combined Oncoarray; iCOGS; GWAS meta analysis) || id:ieu-a-1126	Breast cancer (Combined Oncoarray; iCOGS; GWAS meta analysis)	Breast cancer (Combined Oncoarray; iCOGS; GWAS meta analysis) || ||	TRUE	igd	2	185601420	0.011	2.17e-11	77096	ieu-b-42	schizophrenia || id:ieu-b-42	TRUE	reported	igd	2	TRUE	0.000580392	44.7708
rs11693528	G	C	G	C	0.102797	0.013	0.185	0.1848	FALSE	TRUE	FALSE	ieu-a-1126	2	200736507	0.008	228951	0.1042	Breast cancer (Combined Oncoarray; iCOGS; GWAS meta analysis) || id:ieu-a-1126	Breast cancer (Combined Oncoarray; iCOGS; GWAS meta analysis)	Breast cancer (Combined Oncoarray; iCOGS; GWAS meta analysis) || ||	TRUE	igd	2	200736507	0.0136	4.73e-14	77096	ieu-b-42	schizophrenia || id:ieu-b-42	TRUE	reported	igd	2	TRUE	0.000740508	57.131
rs117074560	T	C	T	C	-0.156595	-0.0169	0.037	0.05	FALSE	FALSE	FALSE	ieu-a-1126	6	96459651	0.015	228951	0.2611	Breast cancer (Combined Oncoarray; iCOGS; GWAS meta analysis) || id:ieu-a-1126	Breast cancer (Combined Oncoarray; iCOGS; GWAS meta analysis)	Breast cancer (Combined Oncoarray; iCOGS; GWAS meta analysis) || ||	TRUE	igd	6	96459651	0.0277	1.66e-08	77096	ieu-b-42	schizophrenia || id:ieu-b-42	TRUE	reported	igd	2	TRUE	0.000414366	31.9584
rs1191551	G	T	G	T	-0.071697	-0.0075	0.784	0.7711	FALSE	FALSE	FALSE	ieu-a-1126	14	30000405	0.0074	228951	0.311	Breast cancer (Combined Oncoarray; iCOGS; GWAS meta analysis) || id:ieu-a-1126	Breast cancer (Combined Oncoarray; iCOGS; GWAS meta analysis)	Breast cancer (Combined Oncoarray; iCOGS; GWAS meta analysis) || ||	TRUE	igd	14	30000405	0.0131	4.21e-08	77096	ieu-b-42	schizophrenia || id:ieu-b-42	TRUE	reported	igd	2	TRUE	0.000388382	29.9535
rs12062861	A	G	A	G	-0.091096	0.0016	0.175	0.1618	FALSE	FALSE	FALSE	ieu-a-1126	1	150017281	0.0086	228951	0.8557	Breast cancer (Combined Oncoarray; iCOGS; GWAS meta analysis) || id:ieu-a-1126	Breast cancer (Combined Oncoarray; iCOGS; GWAS meta analysis)	Breast cancer (Combined Oncoarray; iCOGS; GWAS meta analysis) || ||	TRUE	igd	1	150017281	0.0149	9.66e-10	77096	ieu-b-42	schizophrenia || id:ieu-b-42	TRUE	reported	igd	2	TRUE	0.0004846	37.3779
rs1233578	G	A	G	A	-0.196397	-0.0313	0.149	0.1438	FALSE	FALSE	FALSE	ieu-a-1126	6	28712247	0.0093	228951	0.000746397	Breast cancer (Combined Oncoarray; iCOGS; GWAS meta analysis) || id:ieu-a-1126	Breast cancer (Combined Oncoarray; iCOGS; GWAS meta analysis)	Breast cancer (Combined Oncoarray; iCOGS; GWAS meta analysis) || ||	TRUE	igd	6	28712247	0.0164	6.17e-33	77096	ieu-b-42	schizophrenia || id:ieu-b-42	TRUE	reported	igd	2	TRUE	0.00185671	143.407
rs12691307	G	A	G	A	-0.071902	-0.002	0.478	0.5443	FALSE	FALSE	FALSE	ieu-a-1126	16	29939877	0.0063	228951	0.7561	Breast cancer (Combined Oncoarray; iCOGS; GWAS meta analysis) || id:ieu-a-1126	Breast cancer (Combined Oncoarray; iCOGS; GWAS meta analysis)	Breast cancer (Combined Oncoarray; iCOGS; GWAS meta analysis) || ||	TRUE	igd	16	29939877	0.0113	2.03e-10	77096	ieu-b-42	schizophrenia || id:ieu-b-42	TRUE	reported	igd	2	TRUE	0.000524886	40.4868
rs12704290	A	G	A	G	-0.106105	-0.0091	0.131	0.1248	FALSE	FALSE	FALSE	ieu-a-1126	7	86427626	0.0094	228951	0.3342	Breast cancer (Combined Oncoarray; iCOGS; GWAS meta analysis) || id:ieu-a-1126	Breast cancer (Combined Oncoarray; iCOGS; GWAS meta analysis)	Breast cancer (Combined Oncoarray; iCOGS; GWAS meta analysis) || ||	TRUE	igd	7	86427626	0.0168	2.59e-10	77096	ieu-b-42	schizophrenia || id:ieu-b-42	TRUE	reported	igd	2	TRUE	0.000517126	39.888
rs12887734	T	G	T	G	0.088304	-0.0017	0.273	0.2871	FALSE	FALSE	FALSE	ieu-a-1126	14	104046834	0.0068	228951	0.8025	Breast cancer (Combined Oncoarray; iCOGS; GWAS meta analysis) || id:ieu-a-1126	Breast cancer (Combined Oncoarray; iCOGS; GWAS meta analysis)	Breast cancer (Combined Oncoarray; iCOGS; GWAS meta analysis) || ||	TRUE	igd	14	104046834	0.0121	3.72e-13	77096	ieu-b-42	schizophrenia || id:ieu-b-42	TRUE	reported	igd	2	TRUE	0.000690332	53.2573
rs13240464	C	T	C	T	-0.080704	-0.0072	0.379	0.3358	FALSE	FALSE	FALSE	ieu-a-1126	7	110898915	0.0067	228951	0.2831	Breast cancer (Combined Oncoarray; iCOGS; GWAS meta analysis) || id:ieu-a-1126	Breast cancer (Combined Oncoarray; iCOGS; GWAS meta analysis)	Breast cancer (Combined Oncoarray; iCOGS; GWAS meta analysis) || ||	TRUE	igd	7	110898915	0.0116	3.12e-12	77096	ieu-b-42	schizophrenia || id:ieu-b-42	TRUE	reported	igd	2	TRUE	0.000627436	48.402
rs13261481	G	T	G	T	-0.062402	-0.004	0.591	0.6018	FALSE	FALSE	FALSE	ieu-a-1126	8	60701801	0.0067	228951	0.5539	Breast cancer (Combined Oncoarray; iCOGS; GWAS meta analysis) || id:ieu-a-1126	Breast cancer (Combined Oncoarray; iCOGS; GWAS meta analysis)	Breast cancer (Combined Oncoarray; iCOGS; GWAS meta analysis) || ||	TRUE	igd	8	60701801	0.011	1.66e-08	77096	ieu-b-42	schizophrenia || id:ieu-b-42	TRUE	reported	igd	2	TRUE	0.000417252	32.1811
rs1339227	T	C	T	C	-0.063302	-0.0144	0.355	0.3571	FALSE	FALSE	FALSE	ieu-a-1126	6	73155701	0.0065	228951	0.0265901	Breast cancer (Combined Oncoarray; iCOGS; GWAS meta analysis) || id:ieu-a-1126	Breast cancer (Combined Oncoarray; iCOGS; GWAS meta analysis)	Breast cancer (Combined Oncoarray; iCOGS; GWAS meta analysis) || ||	TRUE	igd	6	73155701	0.0114	3.06e-08	77096	ieu-b-42	schizophrenia || id:ieu-b-42	TRUE	reported	igd	2	TRUE	0.000399779	30.8329
rs1498232	C	T	C	T	-0.072004	-0.0112	0.697	0.6885	FALSE	FALSE	FALSE	ieu-a-1126	1	30433951	0.0069	228951	0.1048	Breast cancer (Combined Oncoarray; iCOGS; GWAS meta analysis) || id:ieu-a-1126	Breast cancer (Combined Oncoarray; iCOGS; GWAS meta analysis)	Breast cancer (Combined Oncoarray; iCOGS; GWAS meta analysis) || ||	TRUE	igd	1	30433951	0.0118	1.21e-09	77096	ieu-b-42	schizophrenia || id:ieu-b-42	TRUE	reported	igd	2	TRUE	0.000482734	37.2339
rs1509378	G	A	G	A	-0.0692	0.0066	0.646	0.645	FALSE	FALSE	FALSE	ieu-a-1126	2	22754466	0.0069	228951	0.3354	Breast cancer (Combined Oncoarray; iCOGS; GWAS meta analysis) || id:ieu-a-1126	Breast cancer (Combined Oncoarray; iCOGS; GWAS meta analysis)	Breast cancer (Combined Oncoarray; iCOGS; GWAS meta analysis) || ||	TRUE	igd	2	22754466	0.0119	5.39e-09	77096	ieu-b-42	schizophrenia || id:ieu-b-42	TRUE	reported	igd	2	TRUE	0.000438426	33.8148
rs16867576	G	A	G	A	-0.095801	0.0015	0.12	0.1281	FALSE	FALSE	FALSE	ieu-a-1126	5	88746331	0.0098	228951	0.8769	Breast cancer (Combined Oncoarray; iCOGS; GWAS meta analysis) || id:ieu-a-1126	Breast cancer (Combined Oncoarray; iCOGS; GWAS meta analysis)	Breast cancer (Combined Oncoarray; iCOGS; GWAS meta analysis) || ||	TRUE	igd	5	88746331	0.017	1.6e-08	77096	ieu-b-42	schizophrenia || id:ieu-b-42	TRUE	reported	igd	2	TRUE	0.000411748	31.7564
rs1702294	C	T	C	T	0.118401	0.0009	0.784	0.8033	FALSE	FALSE	FALSE	ieu-a-1126	1	98501984	0.0078	228951	0.9073	Breast cancer (Combined Oncoarray; iCOGS; GWAS meta analysis) || id:ieu-a-1126	Breast cancer (Combined Oncoarray; iCOGS; GWAS meta analysis)	Breast cancer (Combined Oncoarray; iCOGS; GWAS meta analysis) || ||	TRUE	igd	1	98501984	0.0138	1.03e-17	77096	ieu-b-42	schizophrenia || id:ieu-b-42	TRUE	reported	igd	2	TRUE	0.000953907	73.6108
rs17108967	C	T	C	T	0.065296	0.0159	0.343	0.3363	FALSE	FALSE	FALSE	ieu-a-1126	14	71542168	0.0065	228951	0.0147201	Breast cancer (Combined Oncoarray; iCOGS; GWAS meta analysis) || id:ieu-a-1126	Breast cancer (Combined Oncoarray; iCOGS; GWAS meta analysis)	Breast cancer (Combined Oncoarray; iCOGS; GWAS meta analysis) || ||	TRUE	igd	14	71542168	0.0115	1.21e-08	77096	ieu-b-42	schizophrenia || id:ieu-b-42	TRUE	reported	igd	2	TRUE	0.000417988	32.2379
rs17194490	T	G	T	G	0.0966	0.0057	0.165	0.1624	FALSE	FALSE	FALSE	ieu-a-1126	3	2547786	0.0085	228951	0.5004	Breast cancer (Combined Oncoarray; iCOGS; GWAS meta analysis) || id:ieu-a-1126	Breast cancer (Combined Oncoarray; iCOGS; GWAS meta analysis)	Breast cancer (Combined Oncoarray; iCOGS; GWAS meta analysis) || ||	TRUE	igd	3	2547786	0.0148	6.38e-11	77096	ieu-b-42	schizophrenia || id:ieu-b-42	TRUE	reported	igd	2	TRUE	0.00055228	42.601
rs186545906	A	G	A	G	-0.118795	-0.0421	0.108	0.0315	FALSE	FALSE	FALSE	ieu-a-1126	6	32478432	0.0251	228951	0.0933405	Breast cancer (Combined Oncoarray; iCOGS; GWAS meta analysis) || id:ieu-a-1126	Breast cancer (Combined Oncoarray; iCOGS; GWAS meta analysis)	Breast cancer (Combined Oncoarray; iCOGS; GWAS meta analysis) || ||	TRUE	igd	6	32478432	0.0196	1.41e-09	77096	ieu-b-42	schizophrenia || id:ieu-b-42	TRUE	reported	igd	2	TRUE	0.000476261	36.7344
rs2053079	G	A	G	A	0.071797	0.0119	0.265	0.2377	FALSE	FALSE	FALSE	ieu-a-1126	19	30987423	0.0073	228951	0.1038	Breast cancer (Combined Oncoarray; iCOGS; GWAS meta analysis) || id:ieu-a-1126	Breast cancer (Combined Oncoarray; iCOGS; GWAS meta analysis)	Breast cancer (Combined Oncoarray; iCOGS; GWAS meta analysis) || ||	TRUE	igd	19	30987423	0.0127	1.74e-08	77096	ieu-b-42	schizophrenia || id:ieu-b-42	TRUE	reported	igd	2	TRUE	0.000414375	31.9591
rs2103655	A	G	A	G	0.0766	0.0025	0.664	0.6964	FALSE	FALSE	FALSE	ieu-a-1126	20	37425958	0.0075	228951	0.7346	Breast cancer (Combined Oncoarray; iCOGS; GWAS meta analysis) || id:ieu-a-1126	Breast cancer (Combined Oncoarray; iCOGS; GWAS meta analysis)	Breast cancer (Combined Oncoarray; iCOGS; GWAS meta analysis) || ||	TRUE	igd	20	37425958	0.0119	1.24e-10	77096	ieu-b-42	schizophrenia || id:ieu-b-42	TRUE	reported	igd	2	TRUE	0.000537154	41.4336
rs215411	A	T	A	T	0.0692	-0.0107	0.327	0.3323	FALSE	TRUE	FALSE	ieu-a-1126	4	23423603	0.0068	228951	0.1179	Breast cancer (Combined Oncoarray; iCOGS; GWAS meta analysis) || id:ieu-a-1126	Breast cancer (Combined Oncoarray; iCOGS; GWAS meta analysis)	Breast cancer (Combined Oncoarray; iCOGS; GWAS meta analysis) || ||	TRUE	igd	4	23423603	0.0115	1.68e-09	77096	ieu-b-42	schizophrenia || id:ieu-b-42	TRUE	reported	igd	2	TRUE	0.000469441	36.2081
rs2332700	G	C	G	C	-0.0771	-0.0145	0.756	0.7505	FALSE	TRUE	FALSE	ieu-a-1126	14	72417326	0.0072	228951	0.0448497	Breast cancer (Combined Oncoarray; iCOGS; GWAS meta analysis) || id:ieu-a-1126	Breast cancer (Combined Oncoarray; iCOGS; GWAS meta analysis)	Breast cancer (Combined Oncoarray; iCOGS; GWAS meta analysis) || ||	TRUE	igd	14	72417326	0.0125	7.38e-10	77096	ieu-b-42	schizophrenia || id:ieu-b-42	TRUE	reported	igd	2	TRUE	0.000493222	38.0432
rs2414718	A	G	A	G	0.069797	0.0047	0.617	0.5873	FALSE	FALSE	FALSE	ieu-a-1126	15	61863133	0.0063	228951	0.453799	Breast cancer (Combined Oncoarray; iCOGS; GWAS meta analysis) || id:ieu-a-1126	Breast cancer (Combined Oncoarray; iCOGS; GWAS meta analysis)	Breast cancer (Combined Oncoarray; iCOGS; GWAS meta analysis) || ||	TRUE	igd	15	61863133	0.011	1.98e-10	77096	ieu-b-42	schizophrenia || id:ieu-b-42	TRUE	reported	igd	2	TRUE	0.000521951	40.2603
rs2514218	T	C	T	C	-0.072205	-0.006	0.327	0.3511	FALSE	FALSE	FALSE	ieu-a-1126	11	113392994	0.0067	228951	0.3752	Breast cancer (Combined Oncoarray; iCOGS; GWAS meta analysis) || id:ieu-a-1126	Breast cancer (Combined Oncoarray; iCOGS; GWAS meta analysis)	Breast cancer (Combined Oncoarray; iCOGS; GWAS meta analysis) || ||	TRUE	igd	11	113392994	0.0116	4.64e-10	77096	ieu-b-42	schizophrenia || id:ieu-b-42	TRUE	reported	igd	2	TRUE	0.000502306	38.7443
rs2535627	C	T	C	T	-0.070403	-0.0088	0.503	0.4792	FALSE	FALSE	FALSE	ieu-a-1126	3	52845105	0.0062	228951	0.1577	Breast cancer (Combined Oncoarray; iCOGS; GWAS meta analysis) || id:ieu-a-1126	Breast cancer (Combined Oncoarray; iCOGS; GWAS meta analysis)	Breast cancer (Combined Oncoarray; iCOGS; GWAS meta analysis) || ||	TRUE	igd	3	52845105	0.0109	1.17e-10	77096	ieu-b-42	schizophrenia || id:ieu-b-42	TRUE	reported	igd	2	TRUE	0.000540832	41.7175
rs2693698	G	A	G	A	0.061705	-0.0103	0.551	0.5492	FALSE	FALSE	FALSE	ieu-a-1126	14	99719219	0.0064	228951	0.1073	Breast cancer (Combined Oncoarray; iCOGS; GWAS meta analysis) || id:ieu-a-1126	Breast cancer (Combined Oncoarray; iCOGS; GWAS meta analysis)	Breast cancer (Combined Oncoarray; iCOGS; GWAS meta analysis) || ||	TRUE	igd	14	99719219	0.0111	2.99e-08	77096	ieu-b-42	schizophrenia || id:ieu-b-42	TRUE	reported	igd	2	TRUE	0.000400672	30.9018
rs28681284	T	C	T	C	-0.101601	-0.0069	0.214	0.2119	FALSE	FALSE	FALSE	ieu-a-1126	15	78908565	0.0077	228951	0.3666	Breast cancer (Combined Oncoarray; iCOGS; GWAS meta analysis) || id:ieu-a-1126	Breast cancer (Combined Oncoarray; iCOGS; GWAS meta analysis)	Breast cancer (Combined Oncoarray; iCOGS; GWAS meta analysis) || ||	TRUE	igd	15	78908565	0.0141	6.35e-13	77096	ieu-b-42	schizophrenia || id:ieu-b-42	TRUE	reported	igd	2	TRUE	0.000673029	51.9214
rs2909457	A	G	A	G	-0.059697	0.0008	0.574	0.5612	FALSE	FALSE	FALSE	ieu-a-1126	2	162845855	0.0062	228951	0.9002	Breast cancer (Combined Oncoarray; iCOGS; GWAS meta analysis) || id:ieu-a-1126	Breast cancer (Combined Oncoarray; iCOGS; GWAS meta analysis)	Breast cancer (Combined Oncoarray; iCOGS; GWAS meta analysis) || ||	TRUE	igd	2	162845855	0.0109	4.25e-08	77096	ieu-b-42	schizophrenia || id:ieu-b-42	TRUE	reported	igd	2	TRUE	0.000388912	29.9944
rs301797	A	C	A	C	0.066097	0.0076	0.322	0.3202	FALSE	FALSE	FALSE	ieu-a-1126	1	8487323	0.0071	228951	0.2826	Breast cancer (Combined Oncoarray; iCOGS; GWAS meta analysis) || id:ieu-a-1126	Breast cancer (Combined Oncoarray; iCOGS; GWAS meta analysis)	Breast cancer (Combined Oncoarray; iCOGS; GWAS meta analysis) || ||	TRUE	igd	1	8487323	0.0116	1.2e-08	77096	ieu-b-42	schizophrenia || id:ieu-b-42	TRUE	reported	igd	2	TRUE	0.000420952	32.4666
rs34796896	A	G	A	G	-0.082198	-0.0024	0.194	0.2081	FALSE	FALSE	FALSE	ieu-a-1126	3	180623255	0.0077	228951	0.755899	Breast cancer (Combined Oncoarray; iCOGS; GWAS meta analysis) || id:ieu-a-1126	Breast cancer (Combined Oncoarray; iCOGS; GWAS meta analysis)	Breast cancer (Combined Oncoarray; iCOGS; GWAS meta analysis) || ||	TRUE	igd	3	180623255	0.0135	1.23e-09	77096	ieu-b-42	schizophrenia || id:ieu-b-42	TRUE	reported	igd	2	TRUE	0.000480634	37.0718
rs35225200	C	A	C	A	0.144795	0.022	0.087	0.0755	FALSE	FALSE	FALSE	ieu-a-1126	4	103146888	0.0123	228951	0.0731493	Breast cancer (Combined Oncoarray; iCOGS; GWAS meta analysis) || id:ieu-a-1126	Breast cancer (Combined Oncoarray; iCOGS; GWAS meta analysis)	Breast cancer (Combined Oncoarray; iCOGS; GWAS meta analysis) || ||	TRUE	igd	4	103146888	0.0203	9.56e-13	77096	ieu-b-42	schizophrenia || id:ieu-b-42	TRUE	reported	igd	2	TRUE	0.000659473	50.8749
rs35324223	G	A	G	A	0.091995	0.0195	0.181	0.1638	FALSE	FALSE	FALSE	ieu-a-1126	11	46402852	0.0084	228951	0.0205201	Breast cancer (Combined Oncoarray; iCOGS; GWAS meta analysis) || id:ieu-a-1126	Breast cancer (Combined Oncoarray; iCOGS; GWAS meta analysis)	Breast cancer (Combined Oncoarray; iCOGS; GWAS meta analysis) || ||	TRUE	igd	11	46402852	0.0145	2.04e-10	77096	ieu-b-42	schizophrenia || id:ieu-b-42	TRUE	reported	igd	2	TRUE	0.000521836	40.2514
rs35998080	T	G	T	G	0.069004	-0.0018	0.45	0.447	FALSE	FALSE	FALSE	ieu-a-1126	1	73278615	0.0065	228951	0.7872	Breast cancer (Combined Oncoarray; iCOGS; GWAS meta analysis) || id:ieu-a-1126	Breast cancer (Combined Oncoarray; iCOGS; GWAS meta analysis)	Breast cancer (Combined Oncoarray; iCOGS; GWAS meta analysis) || ||	TRUE	igd	1	73278615	0.0112	6.95e-10	77096	ieu-b-42	schizophrenia || id:ieu-b-42	TRUE	reported	igd	2	TRUE	0.000492115	37.9578
rs36068923	G	A	G	A	0.083501	-0.0061	0.187	0.2007	FALSE	FALSE	FALSE	ieu-a-1126	8	111485761	0.0077	228951	0.4302	Breast cancer (Combined Oncoarray; iCOGS; GWAS meta analysis) || id:ieu-a-1126	Breast cancer (Combined Oncoarray; iCOGS; GWAS meta analysis)	Breast cancer (Combined Oncoarray; iCOGS; GWAS meta analysis) || ||	TRUE	igd	8	111485761	0.0134	4.14e-10	77096	ieu-b-42	schizophrenia || id:ieu-b-42	TRUE	reported	igd	2	TRUE	0.000503412	38.8296
rs3798869	A	G	A	G	-0.066802	-0.0046	0.464	0.4391	FALSE	FALSE	FALSE	ieu-a-1126	6	84328660	0.0066	228951	0.481	Breast cancer (Combined Oncoarray; iCOGS; GWAS meta analysis) || id:ieu-a-1126	Breast cancer (Combined Oncoarray; iCOGS; GWAS meta analysis)	Breast cancer (Combined Oncoarray; iCOGS; GWAS meta analysis) || ||	TRUE	igd	6	84328660	0.011	1.09e-09	77096	ieu-b-42	schizophrenia || id:ieu-b-42	TRUE	reported	igd	2	TRUE	0.000478139	36.8793
rs3849046	T	C	T	C	0.062496	0.0115	0.508	0.5415	FALSE	FALSE	FALSE	ieu-a-1126	5	137851192	0.0066	228951	0.0838108	Breast cancer (Combined Oncoarray; iCOGS; GWAS meta analysis) || id:ieu-a-1126	Breast cancer (Combined Oncoarray; iCOGS; GWAS meta analysis)	Breast cancer (Combined Oncoarray; iCOGS; GWAS meta analysis) || ||	TRUE	igd	5	137851192	0.0109	1.04e-08	77096	ieu-b-42	schizophrenia || id:ieu-b-42	TRUE	reported	igd	2	TRUE	0.000426221	32.8731
rs4129585	C	A	C	A	-0.079301	-0.0013	0.558	0.5604	FALSE	FALSE	FALSE	ieu-a-1126	8	143312933	0.0063	228951	0.8323	Breast cancer (Combined Oncoarray; iCOGS; GWAS meta analysis) || id:ieu-a-1126	Breast cancer (Combined Oncoarray; iCOGS; GWAS meta analysis)	Breast cancer (Combined Oncoarray; iCOGS; GWAS meta analysis) || ||	TRUE	igd	8	143312933	0.0109	3.61e-13	77096	ieu-b-42	schizophrenia || id:ieu-b-42	TRUE	reported	igd	2	TRUE	0.000686079	52.9289
rs4391122	G	A	G	A	0.078005	-0.0009	0.462	0.4909	FALSE	FALSE	FALSE	ieu-a-1126	5	60598543	0.0062	228951	0.8866	Breast cancer (Combined Oncoarray; iCOGS; GWAS meta analysis) || id:ieu-a-1126	Breast cancer (Combined Oncoarray; iCOGS; GWAS meta analysis)	Breast cancer (Combined Oncoarray; iCOGS; GWAS meta analysis) || ||	TRUE	igd	5	60598543	0.0109	8.9e-13	77096	ieu-b-42	schizophrenia || id:ieu-b-42	TRUE	reported	igd	2	TRUE	0.000663853	51.213
rs4648845	T	C	T	C	0.067201	-0.0088	0.479	0.499	FALSE	FALSE	FALSE	ieu-a-1126	1	2387101	0.0071	228951	0.2103	Breast cancer (Combined Oncoarray; iCOGS; GWAS meta analysis) || id:ieu-a-1126	Breast cancer (Combined Oncoarray; iCOGS; GWAS meta analysis)	Breast cancer (Combined Oncoarray; iCOGS; GWAS meta analysis) || ||	TRUE	igd	1	2387101	0.0119	1.74e-08	77096	ieu-b-42	schizophrenia || id:ieu-b-42	TRUE	reported	igd	2	TRUE	0.000413472	31.8894
rs55775495	T	C	T	C	-0.068996	-0.0046	0.701	0.6535	FALSE	FALSE	FALSE	ieu-a-1126	2	198245965	0.0067	228951	0.498	Breast cancer (Combined Oncoarray; iCOGS; GWAS meta analysis) || id:ieu-a-1126	Breast cancer (Combined Oncoarray; iCOGS; GWAS meta analysis)	Breast cancer (Combined Oncoarray; iCOGS; GWAS meta analysis) || ||	TRUE	igd	2	198245965	0.0114	1.56e-09	77096	ieu-b-42	schizophrenia || id:ieu-b-42	TRUE	reported	igd	2	TRUE	0.000474898	36.6292
rs5995756	C	T	C	T	-0.072497	-0.0031	0.54	0.557	FALSE	FALSE	FALSE	ieu-a-1126	22	40000313	0.0063	228951	0.621901	Breast cancer (Combined Oncoarray; iCOGS; GWAS meta analysis) || id:ieu-a-1126	Breast cancer (Combined Oncoarray; iCOGS; GWAS meta analysis)	Breast cancer (Combined Oncoarray; iCOGS; GWAS meta analysis) || ||	TRUE	igd	22	40000313	0.0109	2.91e-11	77096	ieu-b-42	schizophrenia || id:ieu-b-42	TRUE	reported	igd	2	TRUE	0.000573464	44.236
rs6439649	T	G	T	G	0.070999	0.0153	0.562	0.5834	FALSE	FALSE	FALSE	ieu-a-1126	3	136371691	0.0063	228951	0.01573	Breast cancer (Combined Oncoarray; iCOGS; GWAS meta analysis) || id:ieu-a-1126	Breast cancer (Combined Oncoarray; iCOGS; GWAS meta analysis)	Breast cancer (Combined Oncoarray; iCOGS; GWAS meta analysis) || ||	TRUE	igd	3	136371691	0.0111	1.37e-10	77096	ieu-b-42	schizophrenia || id:ieu-b-42	TRUE	reported	igd	2	TRUE	0.000530391	40.9117
rs6704768	A	G	A	G	-0.0766	-0.0064	0.529	0.5606	FALSE	FALSE	FALSE	ieu-a-1126	2	233592501	0.0062	228951	0.3011	Breast cancer (Combined Oncoarray; iCOGS; GWAS meta analysis) || id:ieu-a-1126	Breast cancer (Combined Oncoarray; iCOGS; GWAS meta analysis)	Breast cancer (Combined Oncoarray; iCOGS; GWAS meta analysis) || ||	TRUE	igd	2	233592501	0.0109	2.06e-12	77096	ieu-b-42	schizophrenia || id:ieu-b-42	TRUE	reported	igd	2	TRUE	0.000640169	49.3848
rs72986630	T	C	T	C	0.1459	-0.0234	0.054	0.0629	FALSE	FALSE	FALSE	ieu-a-1126	19	11849736	0.0146	228951	0.1099	Breast cancer (Combined Oncoarray; iCOGS; GWAS meta analysis) || id:ieu-a-1126	Breast cancer (Combined Oncoarray; iCOGS; GWAS meta analysis)	Breast cancer (Combined Oncoarray; iCOGS; GWAS meta analysis) || ||	TRUE	igd	19	11849736	0.0266	4.12e-08	77096	ieu-b-42	schizophrenia || id:ieu-b-42	TRUE	reported	igd	2	TRUE	0.000390073	30.084
rs73036062	A	G	A	G	-0.089104	0.0019	0.21	0.2137	FALSE	FALSE	FALSE	ieu-a-1126	11	133828187	0.0081	228951	0.8172	Breast cancer (Combined Oncoarray; iCOGS; GWAS meta analysis) || id:ieu-a-1126	Breast cancer (Combined Oncoarray; iCOGS; GWAS meta analysis)	Breast cancer (Combined Oncoarray; iCOGS; GWAS meta analysis) || ||	TRUE	igd	11	133828187	0.0135	3.68e-11	77096	ieu-b-42	schizophrenia || id:ieu-b-42	TRUE	reported	igd	2	TRUE	0.000564741	43.5628
rs73191547	T	A	T	A	0.066899	-0.0069	0.286	0.3319	FALSE	TRUE	FALSE	ieu-a-1126	8	10033425	0.0071	228951	0.3297	Breast cancer (Combined Oncoarray; iCOGS; GWAS meta analysis) || id:ieu-a-1126	Breast cancer (Combined Oncoarray; iCOGS; GWAS meta analysis)	Breast cancer (Combined Oncoarray; iCOGS; GWAS meta analysis) || ||	TRUE	igd	8	10033425	0.0115	6.13e-09	77096	ieu-b-42	schizophrenia || id:ieu-b-42	TRUE	reported	igd	2	TRUE	0.000438754	33.8402
rs75968099	T	C	T	C	0.080104	-0.0097	0.351	0.3486	FALSE	FALSE	FALSE	ieu-a-1126	3	36858583	0.0069	228951	0.1599	Breast cancer (Combined Oncoarray; iCOGS; GWAS meta analysis) || id:ieu-a-1126	Breast cancer (Combined Oncoarray; iCOGS; GWAS meta analysis)	Breast cancer (Combined Oncoarray; iCOGS; GWAS meta analysis) || ||	TRUE	igd	3	36858583	0.0114	2.31e-12	77096	ieu-b-42	schizophrenia || id:ieu-b-42	TRUE	reported	igd	2	TRUE	0.000640013	49.3728
rs7601312	G	A	G	A	0.058997	0.0002	0.484	0.4829	FALSE	FALSE	FALSE	ieu-a-1126	2	229320093	0.0062	228951	0.9689	Breast cancer (Combined Oncoarray; iCOGS; GWAS meta analysis) || id:ieu-a-1126	Breast cancer (Combined Oncoarray; iCOGS; GWAS meta analysis)	Breast cancer (Combined Oncoarray; iCOGS; GWAS meta analysis) || ||	TRUE	igd	2	229320093	0.0108	4.67e-08	77096	ieu-b-42	schizophrenia || id:ieu-b-42	TRUE	reported	igd	2	TRUE	0.000386912	29.8402
rs760648	A	G	A	G	0.075803	-0.0076	0.416	0.4397	FALSE	FALSE	FALSE	ieu-a-1126	22	42571028	0.0064	228951	0.2365	Breast cancer (Combined Oncoarray; iCOGS; GWAS meta analysis) || id:ieu-a-1126	Breast cancer (Combined Oncoarray; iCOGS; GWAS meta analysis)	Breast cancer (Combined Oncoarray; iCOGS; GWAS meta analysis) || ||	TRUE	igd	22	42571028	0.0118	1.27e-10	77096	ieu-b-42	schizophrenia || id:ieu-b-42	TRUE	reported	igd	2	TRUE	0.000534989	41.2665
rs76355118	G	A	G	A	0.154399	0.0147	0.041	0.0442	FALSE	FALSE	FALSE	ieu-a-1126	2	149412005	0.0158	228951	0.3534	Breast cancer (Combined Oncoarray; iCOGS; GWAS meta analysis) || id:ieu-a-1126	Breast cancer (Combined Oncoarray; iCOGS; GWAS meta analysis)	Breast cancer (Combined Oncoarray; iCOGS; GWAS meta analysis) || ||	TRUE	igd	2	149412005	0.0278	2.78e-08	77096	ieu-b-42	schizophrenia || id:ieu-b-42	TRUE	reported	igd	2	TRUE	0.000399939	30.8452
rs77149735	A	G	A	G	0.284502	0.0266	0.016	0.0259	FALSE	FALSE	FALSE	ieu-a-1126	1	243555105	0.025	228951	0.2869	Breast cancer (Combined Oncoarray; iCOGS; GWAS meta analysis) || id:ieu-a-1126	Breast cancer (Combined Oncoarray; iCOGS; GWAS meta analysis)	Breast cancer (Combined Oncoarray; iCOGS; GWAS meta analysis) || ||	TRUE	igd	1	243555105	0.0485	4.4e-09	77096	ieu-b-42	schizophrenia || id:ieu-b-42	TRUE	reported	igd	2	TRUE	0.00044613	34.4093
rs7801375	G	A	G	A	0.083001	-0.0105	0.847	0.8398	FALSE	FALSE	FALSE	ieu-a-1126	7	131567263	0.009	228951	0.2387	Breast cancer (Combined Oncoarray; iCOGS; GWAS meta analysis) || id:ieu-a-1126	Breast cancer (Combined Oncoarray; iCOGS; GWAS meta analysis)	Breast cancer (Combined Oncoarray; iCOGS; GWAS meta analysis) || ||	TRUE	igd	7	131567263	0.015	2.88e-08	77096	ieu-b-42	schizophrenia || id:ieu-b-42	TRUE	reported	igd	2	TRUE	0.00039699	30.6177
rs7819570	T	G	T	G	0.076498	0.0085	0.207	0.1783	FALSE	FALSE	FALSE	ieu-a-1126	8	89588626	0.0081	228951	0.2931	Breast cancer (Combined Oncoarray; iCOGS; GWAS meta analysis) || id:ieu-a-1126	Breast cancer (Combined Oncoarray; iCOGS; GWAS meta analysis)	Breast cancer (Combined Oncoarray; iCOGS; GWAS meta analysis) || ||	TRUE	igd	8	89588626	0.014	4.47e-08	77096	ieu-b-42	schizophrenia || id:ieu-b-42	TRUE	reported	igd	2	TRUE	0.000387119	29.8561
rs783540	G	A	G	A	0.059899	0.0019	0.43	0.3819	FALSE	FALSE	FALSE	ieu-a-1126	15	83254708	0.0063	228951	0.7613	Breast cancer (Combined Oncoarray; iCOGS; GWAS meta analysis) || id:ieu-a-1126	Breast cancer (Combined Oncoarray; iCOGS; GWAS meta analysis)	Breast cancer (Combined Oncoarray; iCOGS; GWAS meta analysis) || ||	TRUE	igd	15	83254708	0.011	4.77e-08	77096	ieu-b-42	schizophrenia || id:ieu-b-42	TRUE	reported	igd	2	TRUE	0.000384463	29.6512
rs7893279	G	T	G	T	-0.1124	-0.0037	0.125	0.1112	FALSE	FALSE	FALSE	ieu-a-1126	10	18745105	0.0101	228951	0.716101	Breast cancer (Combined Oncoarray; iCOGS; GWAS meta analysis) || id:ieu-a-1126	Breast cancer (Combined Oncoarray; iCOGS; GWAS meta analysis)	Breast cancer (Combined Oncoarray; iCOGS; GWAS meta analysis) || ||	TRUE	igd	10	18745105	0.0175	1.24e-10	77096	ieu-b-42	schizophrenia || id:ieu-b-42	TRUE	reported	igd	2	TRUE	0.000534801	41.252
rs8055219	A	G	A	G	0.076998	-0.002	0.259	0.2323	FALSE	FALSE	FALSE	ieu-a-1126	16	13753384	0.0075	228951	0.7935	Breast cancer (Combined Oncoarray; iCOGS; GWAS meta analysis) || id:ieu-a-1126	Breast cancer (Combined Oncoarray; iCOGS; GWAS meta analysis)	Breast cancer (Combined Oncoarray; iCOGS; GWAS meta analysis) || ||	TRUE	igd	16	13753384	0.0127	1.45e-09	77096	ieu-b-42	schizophrenia || id:ieu-b-42	TRUE	reported	igd	2	TRUE	0.000476555	36.757
rs832190	T	C	T	C	-0.069897	-0.0156	0.613	0.6323	FALSE	FALSE	FALSE	ieu-a-1126	3	63842629	0.0064	228951	0.0151901	Breast cancer (Combined Oncoarray; iCOGS; GWAS meta analysis) || id:ieu-a-1126	Breast cancer (Combined Oncoarray; iCOGS; GWAS meta analysis)	Breast cancer (Combined Oncoarray; iCOGS; GWAS meta analysis) || ||	TRUE	igd	3	63842629	0.0113	5.73e-10	77096	ieu-b-42	schizophrenia || id:ieu-b-42	TRUE	reported	igd	2	TRUE	0.000496036	38.2603
rs9636107	G	A	G	A	0.079595	0.0023	0.497	0.4688	FALSE	FALSE	FALSE	ieu-a-1126	18	53200117	0.0062	228951	0.706401	Breast cancer (Combined Oncoarray; iCOGS; GWAS meta analysis) || id:ieu-a-1126	Breast cancer (Combined Oncoarray; iCOGS; GWAS meta analysis)	Breast cancer (Combined Oncoarray; iCOGS; GWAS meta analysis) || ||	TRUE	igd	18	53200117	0.0108	2.17e-13	77096	ieu-b-42	schizophrenia || id:ieu-b-42	TRUE	reported	igd	2	TRUE	0.000704022	54.3141
rs10108725	T	C	T	C	0.073204	0.006517	0.222	0.2044	FALSE	FALSE	FALSE	ieu-a-1120	8	4191202	0.01675	66450	0.6971	Ovarian cancer || id:ieu-a-1120	Ovarian cancer	Ovarian cancer || ||	TRUE	igd	8	4191202	0.0133	3.32e-08	77096	ieu-b-42	schizophrenia || id:ieu-b-42	TRUE	reported	igd	2	TRUE	0.000392793	30.2939
rs10791097	G	T	G	T	-0.0766	-0.006151	0.52	0.5444	FALSE	FALSE	FALSE	ieu-a-1120	11	130718630	0.01366	66450	0.6526	Ovarian cancer || id:ieu-a-1120	Ovarian cancer	Ovarian cancer || ||	TRUE	igd	11	130718630	0.0109	2.05e-12	77096	ieu-b-42	schizophrenia || id:ieu-b-42	TRUE	reported	igd	2	TRUE	0.000640169	49.3848
rs11027857	A	G	A	G	0.063998	0.007797	0.587	0.5016	FALSE	FALSE	FALSE	ieu-a-1120	11	24403620	0.01347	66450	0.5627	Ovarian cancer || id:ieu-a-1120	Ovarian cancer	Ovarian cancer || ||	TRUE	igd	11	24403620	0.0109	3.67e-09	77096	ieu-b-42	schizophrenia || id:ieu-b-42	TRUE	reported	igd	2	TRUE	0.000446945	34.4722
rs1106568	A	G	A	G	-0.069404	-0.01981	0.744	0.7643	FALSE	FALSE	FALSE	ieu-a-1120	4	176861301	0.01541	66450	0.1988	Ovarian cancer || id:ieu-a-1120	Ovarian cancer	Ovarian cancer || ||	TRUE	igd	4	176861301	0.0125	2.85e-08	77096	ieu-b-42	schizophrenia || id:ieu-b-42	TRUE	reported	igd	2	TRUE	0.000399709	30.8275
rs111294930	G	A	G	A	-0.087699	-0.004951	0.219	0.2836	FALSE	FALSE	FALSE	ieu-a-1120	5	152177121	0.01508	66450	0.742699	Ovarian cancer || id:ieu-a-1120	Ovarian cancer	Ovarian cancer || ||	TRUE	igd	5	152177121	0.0143	9.29e-10	77096	ieu-b-42	schizophrenia || id:ieu-b-42	TRUE	reported	igd	2	TRUE	0.000487611	37.6102
rs11139497	A	T	A	T	0.0656	0.0004927	0.336	0.3132	FALSE	TRUE	FALSE	ieu-a-1120	9	84739941	0.01437	66450	0.9726	Ovarian cancer || id:ieu-a-1120	Ovarian cancer	Ovarian cancer || ||	TRUE	igd	9	84739941	0.0118	2.65e-08	77096	ieu-b-42	schizophrenia || id:ieu-b-42	TRUE	reported	igd	2	TRUE	0.000400717	30.9053
rs11191419	A	T	A	T	-0.101601	-0.006921	0.334	0.3551	FALSE	TRUE	FALSE	ieu-a-1120	10	104612335	0.01388	66450	0.6181	Ovarian cancer || id:ieu-a-1120	Ovarian cancer	Ovarian cancer || ||	TRUE	igd	10	104612335	0.0118	6.69e-18	77096	ieu-b-42	schizophrenia || id:ieu-b-42	TRUE	reported	igd	2	TRUE	0.000960689	74.1346
rs11210892	A	G	A	G	-0.067797	-0.02042	0.652	0.6782	FALSE	FALSE	FALSE	ieu-a-1120	1	44100084	0.01447	66450	0.1582	Ovarian cancer || id:ieu-a-1120	Ovarian cancer	Ovarian cancer || ||	TRUE	igd	1	44100084	0.0115	3.42e-09	77096	ieu-b-42	schizophrenia || id:ieu-b-42	TRUE	reported	igd	2	TRUE	0.000450607	34.7547
rs113397282	C	T	C	T	-0.145	0.04222	0.153	0.06949	FALSE	FALSE	FALSE	ieu-a-1120	6	32488050	0.0398	66450	0.2888	Ovarian cancer || id:ieu-a-1120	Ovarian cancer	Ovarian cancer || ||	TRUE	igd	6	32488050	0.0176	1.8e-16	77096	ieu-b-42	schizophrenia || id:ieu-b-42	TRUE	reported	igd	2	TRUE	0.000879623	67.8734
rs11658257	C	G	C	G	-0.066204	0.01116	0.573	0.6709	FALSE	TRUE	TRUE	ieu-a-1120	17	17956459	0.01412	66450	0.4294	Ovarian cancer || id:ieu-a-1120	Ovarian cancer	Ovarian cancer || ||	TRUE	igd	17	17956459	0.0115	8.34e-09	77096	ieu-b-42	schizophrenia || id:ieu-b-42	TRUE	reported	igd	2	FALSE	0.000429689	33.1407
rs11682175	C	T	C	T	0.073496	-0.01191	0.439	0.4745	FALSE	FALSE	FALSE	ieu-a-1120	2	57987593	0.01325	66450	0.3686	Ovarian cancer || id:ieu-a-1120	Ovarian cancer	Ovarian cancer || ||	TRUE	igd	2	57987593	0.0109	1.58e-11	77096	ieu-b-42	schizophrenia || id:ieu-b-42	TRUE	reported	igd	2	TRUE	0.000589368	45.4635
rs11693094	T	C	T	C	-0.073603	-0.01114	0.429	0.465	FALSE	FALSE	FALSE	ieu-a-1120	2	185601420	0.01338	66450	0.4054	Ovarian cancer || id:ieu-a-1120	Ovarian cancer	Ovarian cancer || ||	TRUE	igd	2	185601420	0.011	2.17e-11	77096	ieu-b-42	schizophrenia || id:ieu-b-42	TRUE	reported	igd	2	TRUE	0.000580392	44.7708
rs11693528	G	C	G	C	0.102797	0.00585	0.185	0.1931	FALSE	TRUE	FALSE	ieu-a-1120	2	200736507	0.01702	66450	0.7311	Ovarian cancer || id:ieu-a-1120	Ovarian cancer	Ovarian cancer || ||	TRUE	igd	2	200736507	0.0136	4.73e-14	77096	ieu-b-42	schizophrenia || id:ieu-b-42	TRUE	reported	igd	2	TRUE	0.000740508	57.131
rs117074560	T	C	T	C	-0.156595	-0.05154	0.037	0.04563	FALSE	FALSE	FALSE	ieu-a-1120	6	96459651	0.03142	66450	0.101	Ovarian cancer || id:ieu-a-1120	Ovarian cancer	Ovarian cancer || ||	TRUE	igd	6	96459651	0.0277	1.66e-08	77096	ieu-b-42	schizophrenia || id:ieu-b-42	TRUE	reported	igd	2	TRUE	0.000414366	31.9584
rs11740474	T	A	T	A	0.062695	-0.01807	0.412	0.4309	FALSE	TRUE	TRUE	ieu-a-1120	5	153680747	0.01366	66450	0.1857	Ovarian cancer || id:ieu-a-1120	Ovarian cancer	Ovarian cancer || ||	TRUE	igd	5	153680747	0.0112	2e-08	77096	ieu-b-42	schizophrenia || id:ieu-b-42	TRUE	reported	igd	2	FALSE	0.000406276	31.3342
rs1191551	G	T	G	T	-0.071697	-0.03596	0.784	0.7701	FALSE	FALSE	FALSE	ieu-a-1120	14	30000405	0.01586	66450	0.0234002	Ovarian cancer || id:ieu-a-1120	Ovarian cancer	Ovarian cancer || ||	TRUE	igd	14	30000405	0.0131	4.21e-08	77096	ieu-b-42	schizophrenia || id:ieu-b-42	TRUE	reported	igd	2	TRUE	0.000388382	29.9535
rs12062861	A	G	A	G	-0.091096	-0.02057	0.175	0.1615	FALSE	FALSE	FALSE	ieu-a-1120	1	150017281	0.01812	66450	0.2562	Ovarian cancer || id:ieu-a-1120	Ovarian cancer	Ovarian cancer || ||	TRUE	igd	1	150017281	0.0149	9.66e-10	77096	ieu-b-42	schizophrenia || id:ieu-b-42	TRUE	reported	igd	2	TRUE	0.0004846	37.3779
rs1233578	G	A	G	A	-0.196397	0.03499	0.149	0.15	FALSE	FALSE	FALSE	ieu-a-1120	6	28712247	0.01876	66450	0.06221	Ovarian cancer || id:ieu-a-1120	Ovarian cancer	Ovarian cancer || ||	TRUE	igd	6	28712247	0.0164	6.17e-33	77096	ieu-b-42	schizophrenia || id:ieu-b-42	TRUE	reported	igd	2	TRUE	0.00185671	143.407
rs12691307	G	A	G	A	-0.071902	0.004219	0.478	0.5512	FALSE	FALSE	FALSE	ieu-a-1120	16	29939877	0.01328	66450	0.750699	Ovarian cancer || id:ieu-a-1120	Ovarian cancer	Ovarian cancer || ||	TRUE	igd	16	29939877	0.0113	2.03e-10	77096	ieu-b-42	schizophrenia || id:ieu-b-42	TRUE	reported	igd	2	TRUE	0.000524886	40.4868
rs12704290	A	G	A	G	-0.106105	-0.02087	0.131	0.1316	FALSE	FALSE	FALSE	ieu-a-1120	7	86427626	0.02007	66450	0.2984	Ovarian cancer || id:ieu-a-1120	Ovarian cancer	Ovarian cancer || ||	TRUE	igd	7	86427626	0.0168	2.59e-10	77096	ieu-b-42	schizophrenia || id:ieu-b-42	TRUE	reported	igd	2	TRUE	0.000517126	39.888
rs12887734	T	G	T	G	0.088304	0.01259	0.273	0.2955	FALSE	FALSE	FALSE	ieu-a-1120	14	104046834	0.01461	66450	0.3887	Ovarian cancer || id:ieu-a-1120	Ovarian cancer	Ovarian cancer || ||	TRUE	igd	14	104046834	0.0121	3.72e-13	77096	ieu-b-42	schizophrenia || id:ieu-b-42	TRUE	reported	igd	2	TRUE	0.000690332	53.2573
rs12932476	G	C	G	C	-0.059702	-0.00633	0.512	0.5188	FALSE	TRUE	TRUE	ieu-a-1120	16	63709630	0.01349	66450	0.6389	Ovarian cancer || id:ieu-a-1120	Ovarian cancer	Ovarian cancer || ||	TRUE	igd	16	63709630	0.0109	4.62e-08	77096	ieu-b-42	schizophrenia || id:ieu-b-42	TRUE	reported	igd	2	FALSE	0.000388977	29.9995
rs13240464	C	T	C	T	-0.080704	-0.005394	0.379	0.3317	FALSE	FALSE	FALSE	ieu-a-1120	7	110898915	0.01393	66450	0.698601	Ovarian cancer || id:ieu-a-1120	Ovarian cancer	Ovarian cancer || ||	TRUE	igd	7	110898915	0.0116	3.12e-12	77096	ieu-b-42	schizophrenia || id:ieu-b-42	TRUE	reported	igd	2	TRUE	0.000627436	48.402
rs13261481	G	T	G	T	-0.062402	0.0005887	0.591	0.6003	FALSE	FALSE	FALSE	ieu-a-1120	8	60701801	0.01376	66450	0.9659	Ovarian cancer || id:ieu-a-1120	Ovarian cancer	Ovarian cancer || ||	TRUE	igd	8	60701801	0.011	1.66e-08	77096	ieu-b-42	schizophrenia || id:ieu-b-42	TRUE	reported	igd	2	TRUE	0.000417252	32.1811
rs1339227	T	C	T	C	-0.063302	-0.005692	0.355	0.3492	FALSE	FALSE	FALSE	ieu-a-1120	6	73155701	0.01395	66450	0.6832	Ovarian cancer || id:ieu-a-1120	Ovarian cancer	Ovarian cancer || ||	TRUE	igd	6	73155701	0.0114	3.06e-08	77096	ieu-b-42	schizophrenia || id:ieu-b-42	TRUE	reported	igd	2	TRUE	0.000399779	30.8329
rs1498232	C	T	C	T	-0.072004	0.01365	0.697	0.7089	FALSE	FALSE	FALSE	ieu-a-1120	1	30433951	0.01459	66450	0.3497	Ovarian cancer || id:ieu-a-1120	Ovarian cancer	Ovarian cancer || ||	TRUE	igd	1	30433951	0.0118	1.21e-09	77096	ieu-b-42	schizophrenia || id:ieu-b-42	TRUE	reported	igd	2	TRUE	0.000482734	37.2339
rs1509378	G	A	G	A	-0.0692	0.01223	0.646	0.6537	FALSE	FALSE	FALSE	ieu-a-1120	2	22754466	0.01548	66450	0.4294	Ovarian cancer || id:ieu-a-1120	Ovarian cancer	Ovarian cancer || ||	TRUE	igd	2	22754466	0.0119	5.39e-09	77096	ieu-b-42	schizophrenia || id:ieu-b-42	TRUE	reported	igd	2	TRUE	0.000438426	33.8148
rs16867576	G	A	G	A	-0.095801	0.008604	0.12	0.1342	FALSE	FALSE	FALSE	ieu-a-1120	5	88746331	0.02058	66450	0.675899	Ovarian cancer || id:ieu-a-1120	Ovarian cancer	Ovarian cancer || ||	TRUE	igd	5	88746331	0.017	1.6e-08	77096	ieu-b-42	schizophrenia || id:ieu-b-42	TRUE	reported	igd	2	TRUE	0.000411748	31.7564
rs1702294	C	T	C	T	0.118401	0.005789	0.784	0.8021	FALSE	FALSE	FALSE	ieu-a-1120	1	98501984	0.0167	66450	0.7289	Ovarian cancer || id:ieu-a-1120	Ovarian cancer	Ovarian cancer || ||	TRUE	igd	1	98501984	0.0138	1.03e-17	77096	ieu-b-42	schizophrenia || id:ieu-b-42	TRUE	reported	igd	2	TRUE	0.000953907	73.6108
rs17108967	C	T	C	T	0.065296	0.009647	0.343	0.3535	FALSE	FALSE	FALSE	ieu-a-1120	14	71542168	0.01394	66450	0.4888	Ovarian cancer || id:ieu-a-1120	Ovarian cancer	Ovarian cancer || ||	TRUE	igd	14	71542168	0.0115	1.21e-08	77096	ieu-b-42	schizophrenia || id:ieu-b-42	TRUE	reported	igd	2	TRUE	0.000417988	32.2379
rs17194490	T	G	T	G	0.0966	0.01366	0.165	0.1724	FALSE	FALSE	FALSE	ieu-a-1120	3	2547786	0.01791	66450	0.4458	Ovarian cancer || id:ieu-a-1120	Ovarian cancer	Ovarian cancer || ||	TRUE	igd	3	2547786	0.0148	6.38e-11	77096	ieu-b-42	schizophrenia || id:ieu-b-42	TRUE	reported	igd	2	TRUE	0.00055228	42.601
rs186545906	A	G	A	G	-0.118795	0.001647	0.108	0.02908	FALSE	FALSE	FALSE	ieu-a-1120	6	32478432	0.04959	66450	0.9735	Ovarian cancer || id:ieu-a-1120	Ovarian cancer	Ovarian cancer || ||	TRUE	igd	6	32478432	0.0196	1.41e-09	77096	ieu-b-42	schizophrenia || id:ieu-b-42	TRUE	reported	igd	2	TRUE	0.000476261	36.7344
rs2053079	G	A	G	A	0.071797	0.02532	0.265	0.2178	FALSE	FALSE	FALSE	ieu-a-1120	19	30987423	0.01566	66450	0.1059	Ovarian cancer || id:ieu-a-1120	Ovarian cancer	Ovarian cancer || ||	TRUE	igd	19	30987423	0.0127	1.74e-08	77096	ieu-b-42	schizophrenia || id:ieu-b-42	TRUE	reported	igd	2	TRUE	0.000414375	31.9591
rs2103655	A	G	A	G	0.0766	0.0228	0.664	0.6919	FALSE	FALSE	FALSE	ieu-a-1120	20	37425958	0.01497	66450	0.1278	Ovarian cancer || id:ieu-a-1120	Ovarian cancer	Ovarian cancer || ||	TRUE	igd	20	37425958	0.0119	1.24e-10	77096	ieu-b-42	schizophrenia || id:ieu-b-42	TRUE	reported	igd	2	TRUE	0.000537154	41.4336
rs215411	A	T	A	T	0.0692	0.01531	0.327	0.3226	FALSE	TRUE	FALSE	ieu-a-1120	4	23423603	0.01418	66450	0.2803	Ovarian cancer || id:ieu-a-1120	Ovarian cancer	Ovarian cancer || ||	TRUE	igd	4	23423603	0.0115	1.68e-09	77096	ieu-b-42	schizophrenia || id:ieu-b-42	TRUE	reported	igd	2	TRUE	0.000469441	36.2081
rs2332700	G	C	G	C	-0.0771	-0.005166	0.756	0.7494	FALSE	TRUE	FALSE	ieu-a-1120	14	72417326	0.01569	66450	0.741899	Ovarian cancer || id:ieu-a-1120	Ovarian cancer	Ovarian cancer || ||	TRUE	igd	14	72417326	0.0125	7.38e-10	77096	ieu-b-42	schizophrenia || id:ieu-b-42	TRUE	reported	igd	2	TRUE	0.000493222	38.0432
rs2414718	A	G	A	G	0.069797	-0.009519	0.617	0.566	FALSE	FALSE	FALSE	ieu-a-1120	15	61863133	0.01342	66450	0.4781	Ovarian cancer || id:ieu-a-1120	Ovarian cancer	Ovarian cancer || ||	TRUE	igd	15	61863133	0.011	1.98e-10	77096	ieu-b-42	schizophrenia || id:ieu-b-42	TRUE	reported	igd	2	TRUE	0.000521951	40.2603
rs2514218	T	C	T	C	-0.072205	-0.01001	0.327	0.3534	FALSE	FALSE	FALSE	ieu-a-1120	11	113392994	0.01404	66450	0.4761	Ovarian cancer || id:ieu-a-1120	Ovarian cancer	Ovarian cancer || ||	TRUE	igd	11	113392994	0.0116	4.64e-10	77096	ieu-b-42	schizophrenia || id:ieu-b-42	TRUE	reported	igd	2	TRUE	0.000502306	38.7443
rs2535627	C	T	C	T	-0.070403	0.0187	0.503	0.4775	FALSE	FALSE	FALSE	ieu-a-1120	3	52845105	0.01325	66450	0.1581	Ovarian cancer || id:ieu-a-1120	Ovarian cancer	Ovarian cancer || ||	TRUE	igd	3	52845105	0.0109	1.17e-10	77096	ieu-b-42	schizophrenia || id:ieu-b-42	TRUE	reported	igd	2	TRUE	0.000540832	41.7175
rs2693698	G	A	G	A	0.061705	0.007654	0.551	0.5403	FALSE	FALSE	FALSE	ieu-a-1120	14	99719219	0.01336	66450	0.5668	Ovarian cancer || id:ieu-a-1120	Ovarian cancer	Ovarian cancer || ||	TRUE	igd	14	99719219	0.0111	2.99e-08	77096	ieu-b-42	schizophrenia || id:ieu-b-42	TRUE	reported	igd	2	TRUE	0.000400672	30.9018
rs28681284	T	C	T	C	-0.101601	-0.009884	0.214	0.2107	FALSE	FALSE	FALSE	ieu-a-1120	15	78908565	0.01609	66450	0.5391	Ovarian cancer || id:ieu-a-1120	Ovarian cancer	Ovarian cancer || ||	TRUE	igd	15	78908565	0.0141	6.35e-13	77096	ieu-b-42	schizophrenia || id:ieu-b-42	TRUE	reported	igd	2	TRUE	0.000673029	51.9214
rs2905432	A	G	A	G	-0.066001	-0.03363	0.671	0.6568	FALSE	FALSE	FALSE	ieu-a-1120	19	19484295	0.01384	66450	0.0151098	Ovarian cancer || id:ieu-a-1120	Ovarian cancer	Ovarian cancer || ||	TRUE	igd	19	19484295	0.0114	7.51e-09	77096	ieu-b-42	schizophrenia || id:ieu-b-42	TRUE	reported	igd	2	TRUE	0.000434581	33.5182
rs2909457	A	G	A	G	-0.059697	-0.001708	0.574	0.5571	FALSE	FALSE	FALSE	ieu-a-1120	2	162845855	0.01335	66450	0.8982	Ovarian cancer || id:ieu-a-1120	Ovarian cancer	Ovarian cancer || ||	TRUE	igd	2	162845855	0.0109	4.25e-08	77096	ieu-b-42	schizophrenia || id:ieu-b-42	TRUE	reported	igd	2	TRUE	0.000388912	29.9944
rs301797	A	C	A	C	0.066097	0.01477	0.322	0.3243	FALSE	FALSE	FALSE	ieu-a-1120	1	8487323	0.01451	66450	0.3089	Ovarian cancer || id:ieu-a-1120	Ovarian cancer	Ovarian cancer || ||	TRUE	igd	1	8487323	0.0116	1.2e-08	77096	ieu-b-42	schizophrenia || id:ieu-b-42	TRUE	reported	igd	2	TRUE	0.000420952	32.4666
rs34796896	A	G	A	G	-0.082198	0.008076	0.194	0.2102	FALSE	FALSE	FALSE	ieu-a-1120	3	180623255	0.01618	66450	0.6178	Ovarian cancer || id:ieu-a-1120	Ovarian cancer	Ovarian cancer || ||	TRUE	igd	3	180623255	0.0135	1.23e-09	77096	ieu-b-42	schizophrenia || id:ieu-b-42	TRUE	reported	igd	2	TRUE	0.000480634	37.0718
rs35225200	C	A	C	A	0.144795	0.05105	0.087	0.08331	FALSE	FALSE	FALSE	ieu-a-1120	4	103146888	0.02493	66450	0.0405602	Ovarian cancer || id:ieu-a-1120	Ovarian cancer	Ovarian cancer || ||	TRUE	igd	4	103146888	0.0203	9.56e-13	77096	ieu-b-42	schizophrenia || id:ieu-b-42	TRUE	reported	igd	2	TRUE	0.000659473	50.8749
rs35324223	G	A	G	A	0.091995	0.03574	0.181	0.1676	FALSE	FALSE	FALSE	ieu-a-1120	11	46402852	0.01772	66450	0.0436999	Ovarian cancer || id:ieu-a-1120	Ovarian cancer	Ovarian cancer || ||	TRUE	igd	11	46402852	0.0145	2.04e-10	77096	ieu-b-42	schizophrenia || id:ieu-b-42	TRUE	reported	igd	2	TRUE	0.000521836	40.2514
rs35998080	T	G	T	G	0.069004	0.007501	0.45	0.4297	FALSE	FALSE	FALSE	ieu-a-1120	1	73278615	0.01348	66450	0.577801	Ovarian cancer || id:ieu-a-1120	Ovarian cancer	Ovarian cancer || ||	TRUE	igd	1	73278615	0.0112	6.95e-10	77096	ieu-b-42	schizophrenia || id:ieu-b-42	TRUE	reported	igd	2	TRUE	0.000492115	37.9578
rs36068923	G	A	G	A	0.083501	0.02994	0.187	0.2023	FALSE	FALSE	FALSE	ieu-a-1120	8	111485761	0.0163	66450	0.0661698	Ovarian cancer || id:ieu-a-1120	Ovarian cancer	Ovarian cancer || ||	TRUE	igd	8	111485761	0.0134	4.14e-10	77096	ieu-b-42	schizophrenia || id:ieu-b-42	TRUE	reported	igd	2	TRUE	0.000503412	38.8296
rs3798869	A	G	A	G	-0.066802	-0.02194	0.464	0.4369	FALSE	FALSE	FALSE	ieu-a-1120	6	84328660	0.01359	66450	0.1066	Ovarian cancer || id:ieu-a-1120	Ovarian cancer	Ovarian cancer || ||	TRUE	igd	6	84328660	0.011	1.09e-09	77096	ieu-b-42	schizophrenia || id:ieu-b-42	TRUE	reported	igd	2	TRUE	0.000478139	36.8793
rs3849046	T	C	T	C	0.062496	0.02203	0.508	0.5373	FALSE	FALSE	FALSE	ieu-a-1120	5	137851192	0.0136	66450	0.1051	Ovarian cancer || id:ieu-a-1120	Ovarian cancer	Ovarian cancer || ||	TRUE	igd	5	137851192	0.0109	1.04e-08	77096	ieu-b-42	schizophrenia || id:ieu-b-42	TRUE	reported	igd	2	TRUE	0.000426221	32.8731
rs4129585	C	A	C	A	-0.079301	0.002633	0.558	0.5552	FALSE	FALSE	FALSE	ieu-a-1120	8	143312933	0.01339	66450	0.844	Ovarian cancer || id:ieu-a-1120	Ovarian cancer	Ovarian cancer || ||	TRUE	igd	8	143312933	0.0109	3.61e-13	77096	ieu-b-42	schizophrenia || id:ieu-b-42	TRUE	reported	igd	2	TRUE	0.000686079	52.9289
rs4391122	G	A	G	A	0.078005	-0.02221	0.462	0.4956	FALSE	FALSE	FALSE	ieu-a-1120	5	60598543	0.0132	66450	0.0924507	Ovarian cancer || id:ieu-a-1120	Ovarian cancer	Ovarian cancer || ||	TRUE	igd	5	60598543	0.0109	8.9e-13	77096	ieu-b-42	schizophrenia || id:ieu-b-42	TRUE	reported	igd	2	TRUE	0.000663853	51.213
rs4523957	T	G	T	G	0.069703	-0.007067	0.603	0.6221	FALSE	FALSE	FALSE	ieu-a-1120	17	2208899	0.0139	66450	0.611299	Ovarian cancer || id:ieu-a-1120	Ovarian cancer	Ovarian cancer || ||	TRUE	igd	17	2208899	0.0115	1.4e-09	77096	ieu-b-42	schizophrenia || id:ieu-b-42	TRUE	reported	igd	2	TRUE	0.000476287	36.7363
rs4648845	T	C	T	C	0.067201	-0.002019	0.479	0.5082	FALSE	FALSE	FALSE	ieu-a-1120	1	2387101	0.01412	66450	0.8863	Ovarian cancer || id:ieu-a-1120	Ovarian cancer	Ovarian cancer || ||	TRUE	igd	1	2387101	0.0119	1.74e-08	77096	ieu-b-42	schizophrenia || id:ieu-b-42	TRUE	reported	igd	2	TRUE	0.000413472	31.8894
rs4702	A	G	A	G	-0.080505	-0.02766	0.574	0.5571	FALSE	FALSE	FALSE	ieu-a-1120	15	91426560	0.01328	66450	0.0372598	Ovarian cancer || id:ieu-a-1120	Ovarian cancer	Ovarian cancer || ||	TRUE	igd	15	91426560	0.0115	2.62e-12	77096	ieu-b-42	schizophrenia || id:ieu-b-42	TRUE	reported	igd	2	TRUE	0.000635246	49.0048
rs55775495	T	C	T	C	-0.068996	-0.01175	0.701	0.6368	FALSE	FALSE	FALSE	ieu-a-1120	2	198245965	0.01415	66450	0.406	Ovarian cancer || id:ieu-a-1120	Ovarian cancer	Ovarian cancer || ||	TRUE	igd	2	198245965	0.0114	1.56e-09	77096	ieu-b-42	schizophrenia || id:ieu-b-42	TRUE	reported	igd	2	TRUE	0.000474898	36.6292
rs58120505	C	T	C	T	-0.082197	0.01406	0.412	0.4324	FALSE	FALSE	FALSE	ieu-a-1120	7	2029867	0.0134	66450	0.2939	Ovarian cancer || id:ieu-a-1120	Ovarian cancer	Ovarian cancer || ||	TRUE	igd	7	2029867	0.0111	1.26e-13	77096	ieu-b-42	schizophrenia || id:ieu-b-42	TRUE	reported	igd	2	TRUE	0.000710764	54.8346
rs5995756	C	T	C	T	-0.072497	0.002157	0.54	0.5666	FALSE	FALSE	FALSE	ieu-a-1120	22	40000313	0.01335	66450	0.8716	Ovarian cancer || id:ieu-a-1120	Ovarian cancer	Ovarian cancer || ||	TRUE	igd	22	40000313	0.0109	2.91e-11	77096	ieu-b-42	schizophrenia || id:ieu-b-42	TRUE	reported	igd	2	TRUE	0.000573464	44.236
rs6439649	T	G	T	G	0.070999	0.02517	0.562	0.5911	FALSE	FALSE	FALSE	ieu-a-1120	3	136371691	0.01352	66450	0.0626902	Ovarian cancer || id:ieu-a-1120	Ovarian cancer	Ovarian cancer || ||	TRUE	igd	3	136371691	0.0111	1.37e-10	77096	ieu-b-42	schizophrenia || id:ieu-b-42	TRUE	reported	igd	2	TRUE	0.000530391	40.9117
rs6704768	A	G	A	G	-0.0766	0.013	0.529	0.5641	FALSE	FALSE	FALSE	ieu-a-1120	2	233592501	0.01331	66450	0.3286	Ovarian cancer || id:ieu-a-1120	Ovarian cancer	Ovarian cancer || ||	TRUE	igd	2	233592501	0.0109	2.06e-12	77096	ieu-b-42	schizophrenia || id:ieu-b-42	TRUE	reported	igd	2	TRUE	0.000640169	49.3848
rs72986630	T	C	T	C	0.1459	-0.04881	0.054	0.06511	FALSE	FALSE	FALSE	ieu-a-1120	19	11849736	0.02941	66450	0.0969706	Ovarian cancer || id:ieu-a-1120	Ovarian cancer	Ovarian cancer || ||	TRUE	igd	19	11849736	0.0266	4.12e-08	77096	ieu-b-42	schizophrenia || id:ieu-b-42	TRUE	reported	igd	2	TRUE	0.000390073	30.084
rs73036062	A	G	A	G	-0.089104	-0.0007806	0.21	0.2056	FALSE	FALSE	FALSE	ieu-a-1120	11	133828187	0.01718	66450	0.9637	Ovarian cancer || id:ieu-a-1120	Ovarian cancer	Ovarian cancer || ||	TRUE	igd	11	133828187	0.0135	3.68e-11	77096	ieu-b-42	schizophrenia || id:ieu-b-42	TRUE	reported	igd	2	TRUE	0.000564741	43.5628
rs73191547	T	A	T	A	0.066899	0.01551	0.286	0.3245	FALSE	TRUE	FALSE	ieu-a-1120	8	10033425	0.01558	66450	0.3196	Ovarian cancer || id:ieu-a-1120	Ovarian cancer	Ovarian cancer || ||	TRUE	igd	8	10033425	0.0115	6.13e-09	77096	ieu-b-42	schizophrenia || id:ieu-b-42	TRUE	reported	igd	2	TRUE	0.000438754	33.8402
rs73229090	A	C	A	C	-0.0995	-0.01327	0.121	0.115	FALSE	FALSE	FALSE	ieu-a-1120	8	27442127	0.02157	66450	0.5384	Ovarian cancer || id:ieu-a-1120	Ovarian cancer	Ovarian cancer || ||	TRUE	igd	8	27442127	0.0177	1.95e-08	77096	ieu-b-42	schizophrenia || id:ieu-b-42	TRUE	reported	igd	2	TRUE	0.000409722	31.6001
rs75968099	T	C	T	C	0.080104	0.00255	0.351	0.3425	FALSE	FALSE	FALSE	ieu-a-1120	3	36858583	0.01416	66450	0.8571	Ovarian cancer || id:ieu-a-1120	Ovarian cancer	Ovarian cancer || ||	TRUE	igd	3	36858583	0.0114	2.31e-12	77096	ieu-b-42	schizophrenia || id:ieu-b-42	TRUE	reported	igd	2	TRUE	0.000640013	49.3728
rs7601312	G	A	G	A	0.058997	-0.01263	0.484	0.4656	FALSE	FALSE	FALSE	ieu-a-1120	2	229320093	0.01327	66450	0.3415	Ovarian cancer || id:ieu-a-1120	Ovarian cancer	Ovarian cancer || ||	TRUE	igd	2	229320093	0.0108	4.67e-08	77096	ieu-b-42	schizophrenia || id:ieu-b-42	TRUE	reported	igd	2	TRUE	0.000386912	29.8402
rs760648	A	G	A	G	0.075803	0.0284	0.416	0.4264	FALSE	FALSE	FALSE	ieu-a-1120	22	42571028	0.0136	66450	0.0367697	Ovarian cancer || id:ieu-a-1120	Ovarian cancer	Ovarian cancer || ||	TRUE	igd	22	42571028	0.0118	1.27e-10	77096	ieu-b-42	schizophrenia || id:ieu-b-42	TRUE	reported	igd	2	TRUE	0.000534989	41.2665
rs76355118	G	A	G	A	0.154399	0.02999	0.041	0.04443	FALSE	FALSE	FALSE	ieu-a-1120	2	149412005	0.03397	66450	0.3774	Ovarian cancer || id:ieu-a-1120	Ovarian cancer	Ovarian cancer || ||	TRUE	igd	2	149412005	0.0278	2.78e-08	77096	ieu-b-42	schizophrenia || id:ieu-b-42	TRUE	reported	igd	2	TRUE	0.000399939	30.8452
rs77149735	A	G	A	G	0.284502	0.001693	0.016	0.03202	FALSE	FALSE	FALSE	ieu-a-1120	1	243555105	0.05143	66450	0.9737	Ovarian cancer || id:ieu-a-1120	Ovarian cancer	Ovarian cancer || ||	TRUE	igd	1	243555105	0.0485	4.4e-09	77096	ieu-b-42	schizophrenia || id:ieu-b-42	TRUE	reported	igd	2	TRUE	0.00044613	34.4093
rs7801375	G	A	G	A	0.083001	-0.01509	0.847	0.8494	FALSE	FALSE	FALSE	ieu-a-1120	7	131567263	0.0186	66450	0.4172	Ovarian cancer || id:ieu-a-1120	Ovarian cancer	Ovarian cancer || ||	TRUE	igd	7	131567263	0.015	2.88e-08	77096	ieu-b-42	schizophrenia || id:ieu-b-42	TRUE	reported	igd	2	TRUE	0.00039699	30.6177
rs7819570	T	G	T	G	0.076498	0.02923	0.207	0.1808	FALSE	FALSE	FALSE	ieu-a-1120	8	89588626	0.01722	66450	0.0895303	Ovarian cancer || id:ieu-a-1120	Ovarian cancer	Ovarian cancer || ||	TRUE	igd	8	89588626	0.014	4.47e-08	77096	ieu-b-42	schizophrenia || id:ieu-b-42	TRUE	reported	igd	2	TRUE	0.000387119	29.8561
rs783540	G	A	G	A	0.059899	-0.0001075	0.43	0.3724	FALSE	FALSE	FALSE	ieu-a-1120	15	83254708	0.01347	66450	0.9936	Ovarian cancer || id:ieu-a-1120	Ovarian cancer	Ovarian cancer || ||	TRUE	igd	15	83254708	0.011	4.77e-08	77096	ieu-b-42	schizophrenia || id:ieu-b-42	TRUE	reported	igd	2	TRUE	0.000384463	29.6512
rs7893279	G	T	G	T	-0.1124	-0.03731	0.125	0.1095	FALSE	FALSE	FALSE	ieu-a-1120	10	18745105	0.02142	66450	0.0815493	Ovarian cancer || id:ieu-a-1120	Ovarian cancer	Ovarian cancer || ||	TRUE	igd	10	18745105	0.0175	1.24e-10	77096	ieu-b-42	schizophrenia || id:ieu-b-42	TRUE	reported	igd	2	TRUE	0.000534801	41.252
rs8055219	A	G	A	G	0.076998	-0.002108	0.259	0.2331	FALSE	FALSE	FALSE	ieu-a-1120	16	13753384	0.01577	66450	0.8936	Ovarian cancer || id:ieu-a-1120	Ovarian cancer	Ovarian cancer || ||	TRUE	igd	16	13753384	0.0127	1.45e-09	77096	ieu-b-42	schizophrenia || id:ieu-b-42	TRUE	reported	igd	2	TRUE	0.000476555	36.757
rs832190	T	C	T	C	-0.069897	-0.01245	0.613	0.6337	FALSE	FALSE	FALSE	ieu-a-1120	3	63842629	0.01361	66450	0.3602	Ovarian cancer || id:ieu-a-1120	Ovarian cancer	Ovarian cancer || ||	TRUE	igd	3	63842629	0.0113	5.73e-10	77096	ieu-b-42	schizophrenia || id:ieu-b-42	TRUE	reported	igd	2	TRUE	0.000496036	38.2603
rs9636107	G	A	G	A	0.079595	0.01449	0.497	0.4833	FALSE	FALSE	FALSE	ieu-a-1120	18	53200117	0.01322	66450	0.2729	Ovarian cancer || id:ieu-a-1120	Ovarian cancer	Ovarian cancer || ||	TRUE	igd	18	53200117	0.0108	2.17e-13	77096	ieu-b-42	schizophrenia || id:ieu-b-42	TRUE	reported	igd	2	TRUE	0.000704022	54.3141
rs1024582	G	A	G	A	-0.098904	0.122733	0.66	0.7158	FALSE	FALSE	FALSE	ieu-a-1082	12	2402246	0.09232	1187	0.1837	Thyroid cancer || id:ieu-a-1082	Thyroid cancer	Thyroid cancer || ||	TRUE	igd	12	2402246	0.0115	6.27e-18	77096	ieu-b-42	schizophrenia || id:ieu-b-42	TRUE	reported	igd	2	TRUE	0.000958481	73.9641
rs11027857	A	G	A	G	0.063998	0.118333	0.587	0.5152	FALSE	FALSE	FALSE	ieu-a-1082	11	24403620	0.08326	1187	0.1553	Thyroid cancer || id:ieu-a-1082	Thyroid cancer	Thyroid cancer || ||	TRUE	igd	11	24403620	0.0109	3.67e-09	77096	ieu-b-42	schizophrenia || id:ieu-b-42	TRUE	reported	igd	2	TRUE	0.000446945	34.4722
rs1106568	A	G	A	G	-0.069404	-0.0544882	0.744	0.7691	FALSE	FALSE	FALSE	ieu-a-1082	4	176861301	0.09917	1187	0.583201	Thyroid cancer || id:ieu-a-1082	Thyroid cancer	Thyroid cancer || ||	TRUE	igd	4	176861301	0.0125	2.85e-08	77096	ieu-b-42	schizophrenia || id:ieu-b-42	TRUE	reported	igd	2	TRUE	0.000399709	30.8275
rs111294930	G	A	G	A	-0.087699	0.0334348	0.219	0.2669	FALSE	FALSE	FALSE	ieu-a-1082	5	152251201	0.09429	1187	0.723501	Thyroid cancer || id:ieu-a-1082	Thyroid cancer	Thyroid cancer || ||	TRUE	igd	5	152177121	0.0143	9.29e-10	77096	ieu-b-42	schizophrenia || id:ieu-b-42	TRUE	reported	igd	2	TRUE	0.000487611	37.6102
rs11191419	A	T	A	T	-0.101601	-0.0323166	0.334	0.42	FALSE	TRUE	FALSE	ieu-a-1082	10	104628873	0.08426	1187	0.7011	Thyroid cancer || id:ieu-a-1082	Thyroid cancer	Thyroid cancer || ||	TRUE	igd	10	104612335	0.0118	6.69e-18	77096	ieu-b-42	schizophrenia || id:ieu-b-42	TRUE	reported	igd	2	TRUE	0.000960689	74.1346
rs11658257	C	G	C	G	-0.066204	0.0894872	0.573	0.6318	FALSE	TRUE	TRUE	ieu-a-1082	17	17987067	0.08612	1187	0.2985	Thyroid cancer || id:ieu-a-1082	Thyroid cancer	Thyroid cancer || ||	TRUE	igd	17	17956459	0.0115	8.34e-09	77096	ieu-b-42	schizophrenia || id:ieu-b-42	TRUE	reported	igd	2	FALSE	0.000429689	33.1407
rs11693528	G	C	G	C	0.102797	-0.0373904	0.185	0.1256	FALSE	TRUE	FALSE	ieu-a-1082	2	200769539	0.1253	1187	0.765701	Thyroid cancer || id:ieu-a-1082	Thyroid cancer	Thyroid cancer || ||	TRUE	igd	2	200736507	0.0136	4.73e-14	77096	ieu-b-42	schizophrenia || id:ieu-b-42	TRUE	reported	igd	2	TRUE	0.000740508	57.131
rs1191551	G	T	G	T	-0.071697	0.304625	0.784	0.8668	FALSE	FALSE	FALSE	ieu-a-1082	14	30001675	0.1212	1187	0.0117301	Thyroid cancer || id:ieu-a-1082	Thyroid cancer	Thyroid cancer || ||	TRUE	igd	14	30000405	0.0131	4.21e-08	77096	ieu-b-42	schizophrenia || id:ieu-b-42	TRUE	reported	igd	2	TRUE	0.000388382	29.9535
rs12062861	A	G	A	G	-0.091096	-0.118896	0.175	0.1741	FALSE	FALSE	FALSE	ieu-a-1082	1	150080265	0.1092	1187	0.2758	Thyroid cancer || id:ieu-a-1082	Thyroid cancer	Thyroid cancer || ||	TRUE	igd	1	150017281	0.0149	9.66e-10	77096	ieu-b-42	schizophrenia || id:ieu-b-42	TRUE	reported	igd	2	TRUE	0.0004846	37.3779
rs13240464	C	T	C	T	-0.080704	-0.00601807	0.379	0.3591	FALSE	FALSE	FALSE	ieu-a-1082	7	110949566	0.08678	1187	0.9446	Thyroid cancer || id:ieu-a-1082	Thyroid cancer	Thyroid cancer || ||	TRUE	igd	7	110898915	0.0116	3.12e-12	77096	ieu-b-42	schizophrenia || id:ieu-b-42	TRUE	reported	igd	2	TRUE	0.000627436	48.402
rs13261481	G	T	G	T	-0.062402	0.0148886	0.591	0.4709	FALSE	FALSE	FALSE	ieu-a-1082	8	60711404	0.08335	1187	0.8604	Thyroid cancer || id:ieu-a-1082	Thyroid cancer	Thyroid cancer || ||	TRUE	igd	8	60701801	0.011	1.66e-08	77096	ieu-b-42	schizophrenia || id:ieu-b-42	TRUE	reported	igd	2	TRUE	0.000417252	32.1811
rs1615350	T	C	T	C	-0.0851	-0.116004	0.734	0.7085	FALSE	FALSE	FALSE	ieu-a-1082	12	123719444	0.09196	1187	0.2084	Thyroid cancer || id:ieu-a-1082	Thyroid cancer	Thyroid cancer || ||	TRUE	igd	12	123650335	0.0123	4.26e-12	77096	ieu-b-42	schizophrenia || id:ieu-b-42	TRUE	reported	igd	2	TRUE	0.000620508	47.8672
rs1702294	C	T	C	T	0.118401	-0.0732505	0.784	0.8042	FALSE	FALSE	FALSE	ieu-a-1082	1	98502340	0.1053	1187	0.4883	Thyroid cancer || id:ieu-a-1082	Thyroid cancer	Thyroid cancer || ||	TRUE	igd	1	98501984	0.0138	1.03e-17	77096	ieu-b-42	schizophrenia || id:ieu-b-42	TRUE	reported	igd	2	TRUE	0.000953907	73.6108
rs17108967	C	T	C	T	0.065296	0.172271	0.343	0.4094	FALSE	FALSE	FALSE	ieu-a-1082	14	71601079	0.08491	1187	0.0424903	Thyroid cancer || id:ieu-a-1082	Thyroid cancer	Thyroid cancer || ||	TRUE	igd	14	71542168	0.0115	1.21e-08	77096	ieu-b-42	schizophrenia || id:ieu-b-42	TRUE	reported	igd	2	TRUE	0.000417988	32.2379
rs2053079	G	A	G	A	0.071797	0.10436	0.265	0.1883	FALSE	FALSE	FALSE	ieu-a-1082	19	30987423	0.1071	1187	0.3297	Thyroid cancer || id:ieu-a-1082	Thyroid cancer	Thyroid cancer || ||	TRUE	igd	19	30987423	0.0127	1.74e-08	77096	ieu-b-42	schizophrenia || id:ieu-b-42	TRUE	reported	igd	2	TRUE	0.000414375	31.9591
rs2103655	A	G	A	G	0.0766	-0.0178399	0.664	0.6445	FALSE	FALSE	FALSE	ieu-a-1082	20	37425958	0.08695	1187	0.8358	Thyroid cancer || id:ieu-a-1082	Thyroid cancer	Thyroid cancer || ||	TRUE	igd	20	37425958	0.0119	1.24e-10	77096	ieu-b-42	schizophrenia || id:ieu-b-42	TRUE	reported	igd	2	TRUE	0.000537154	41.4336
rs2514218	T	C	T	C	-0.072205	-0.0312843	0.327	0.4331	FALSE	FALSE	FALSE	ieu-a-1082	11	113392994	0.08414	1187	0.7103	Thyroid cancer || id:ieu-a-1082	Thyroid cancer	Thyroid cancer || ||	TRUE	igd	11	113392994	0.0116	4.64e-10	77096	ieu-b-42	schizophrenia || id:ieu-b-42	TRUE	reported	igd	2	TRUE	0.000502306	38.7443
rs2693698	G	A	G	A	0.061705	-0.001998	0.551	0.5067	FALSE	FALSE	FALSE	ieu-a-1082	14	99719219	0.08321	1187	0.98	Thyroid cancer || id:ieu-a-1082	Thyroid cancer	Thyroid cancer || ||	TRUE	igd	14	99719219	0.0111	2.99e-08	77096	ieu-b-42	schizophrenia || id:ieu-b-42	TRUE	reported	igd	2	TRUE	0.000400672	30.9018
rs2905432	A	G	A	G	-0.066001	0.0323166	0.671	0.6631	FALSE	FALSE	FALSE	ieu-a-1082	19	19611550	0.08814	1187	0.713899	Thyroid cancer || id:ieu-a-1082	Thyroid cancer	Thyroid cancer || ||	TRUE	igd	19	19484295	0.0114	7.51e-09	77096	ieu-b-42	schizophrenia || id:ieu-b-42	TRUE	reported	igd	2	TRUE	0.000434581	33.5182
rs301797	A	C	A	C	0.066097	0.00299551	0.322	0.2352	FALSE	FALSE	FALSE	ieu-a-1082	1	8488565	0.09815	1187	0.9716	Thyroid cancer || id:ieu-a-1082	Thyroid cancer	Thyroid cancer || ||	TRUE	igd	1	8487323	0.0116	1.2e-08	77096	ieu-b-42	schizophrenia || id:ieu-b-42	TRUE	reported	igd	2	TRUE	0.000420952	32.4666
rs34796896	A	G	A	G	-0.082198	-0.129312	0.194	0.2504	FALSE	FALSE	FALSE	ieu-a-1082	3	180713021	0.09564	1187	0.1762	Thyroid cancer || id:ieu-a-1082	Thyroid cancer	Thyroid cancer || ||	TRUE	igd	3	180623255	0.0135	1.23e-09	77096	ieu-b-42	schizophrenia || id:ieu-b-42	TRUE	reported	igd	2	TRUE	0.000480634	37.0718
rs35225200	C	A	C	A	0.144795	-0.00290421	0.087	0.09141	FALSE	FALSE	FALSE	ieu-a-1082	4	103188709	0.1443	1187	0.9837	Thyroid cancer || id:ieu-a-1082	Thyroid cancer	Thyroid cancer || ||	TRUE	igd	4	103146888	0.0203	9.56e-13	77096	ieu-b-42	schizophrenia || id:ieu-b-42	TRUE	reported	igd	2	TRUE	0.000659473	50.8749
rs35324223	G	A	G	A	0.091995	-0.0142003	0.181	0.1559	FALSE	FALSE	FALSE	ieu-a-1082	11	46622392	0.1146	1187	0.9014	Thyroid cancer || id:ieu-a-1082	Thyroid cancer	Thyroid cancer || ||	TRUE	igd	11	46402852	0.0145	2.04e-10	77096	ieu-b-42	schizophrenia || id:ieu-b-42	TRUE	reported	igd	2	TRUE	0.000521836	40.2514
rs3798869	A	G	A	G	-0.066802	-0.185366	0.464	0.3079	FALSE	FALSE	FALSE	ieu-a-1082	6	84354101	0.08974	1187	0.0387998	Thyroid cancer || id:ieu-a-1082	Thyroid cancer	Thyroid cancer || ||	TRUE	igd	6	84328660	0.011	1.09e-09	77096	ieu-b-42	schizophrenia || id:ieu-b-42	TRUE	reported	igd	2	TRUE	0.000478139	36.8793
rs4129585	C	A	C	A	-0.079301	-0.0401818	0.558	0.5505	FALSE	FALSE	FALSE	ieu-a-1082	8	143312933	0.08366	1187	0.6303	Thyroid cancer || id:ieu-a-1082	Thyroid cancer	Thyroid cancer || ||	TRUE	igd	8	143312933	0.0109	3.61e-13	77096	ieu-b-42	schizophrenia || id:ieu-b-42	TRUE	reported	igd	2	TRUE	0.000686079	52.9289
rs4648845	T	C	T	C	0.067201	0.0506931	0.479	0.4405	FALSE	FALSE	FALSE	ieu-a-1082	1	2387101	0.084	1187	0.5472	Thyroid cancer || id:ieu-a-1082	Thyroid cancer	Thyroid cancer || ||	TRUE	igd	1	2387101	0.0119	1.74e-08	77096	ieu-b-42	schizophrenia || id:ieu-b-42	TRUE	reported	igd	2	TRUE	0.000413472	31.8894
rs4702	A	G	A	G	-0.080505	-0.126811	0.574	0.4987	FALSE	FALSE	FALSE	ieu-a-1082	15	91426560	0.08339	1187	0.1282	Thyroid cancer || id:ieu-a-1082	Thyroid cancer	Thyroid cancer || ||	TRUE	igd	15	91426560	0.0115	2.62e-12	77096	ieu-b-42	schizophrenia || id:ieu-b-42	TRUE	reported	igd	2	TRUE	0.000635246	49.0048
rs55775495	T	C	T	C	-0.068996	0.0846868	0.701	0.7772	FALSE	FALSE	FALSE	ieu-a-1082	2	198345797	0.09963	1187	0.3951	Thyroid cancer || id:ieu-a-1082	Thyroid cancer	Thyroid cancer || ||	TRUE	igd	2	198245965	0.0114	1.56e-09	77096	ieu-b-42	schizophrenia || id:ieu-b-42	TRUE	reported	igd	2	TRUE	0.000474898	36.6292
rs5995756	C	T	C	T	-0.072497	-0.195567	0.54	0.5872	FALSE	FALSE	FALSE	ieu-a-1082	22	40000313	0.08485	1187	0.02093	Thyroid cancer || id:ieu-a-1082	Thyroid cancer	Thyroid cancer || ||	TRUE	igd	22	40000313	0.0109	2.91e-11	77096	ieu-b-42	schizophrenia || id:ieu-b-42	TRUE	reported	igd	2	TRUE	0.000573464	44.236
rs6439649	T	G	T	G	0.070999	0.0933222	0.562	0.6234	FALSE	FALSE	FALSE	ieu-a-1082	3	136377377	0.08573	1187	0.2763	Thyroid cancer || id:ieu-a-1082	Thyroid cancer	Thyroid cancer || ||	TRUE	igd	3	136371691	0.0111	1.37e-10	77096	ieu-b-42	schizophrenia || id:ieu-b-42	TRUE	reported	igd	2	TRUE	0.000530391	40.9117
rs6704768	A	G	A	G	-0.0766	-0.0592119	0.529	0.5662	FALSE	FALSE	FALSE	ieu-a-1082	2	233597196	0.08405	1187	0.4836	Thyroid cancer || id:ieu-a-1082	Thyroid cancer	Thyroid cancer || ||	TRUE	igd	2	233592501	0.0109	2.06e-12	77096	ieu-b-42	schizophrenia || id:ieu-b-42	TRUE	reported	igd	2	TRUE	0.000640169	49.3848
rs75968099	T	C	T	C	0.080104	0.0430595	0.351	0.3496	FALSE	FALSE	FALSE	ieu-a-1082	3	36862980	0.08771	1187	0.624701	Thyroid cancer || id:ieu-a-1082	Thyroid cancer	Thyroid cancer || ||	TRUE	igd	3	36858583	0.0114	2.31e-12	77096	ieu-b-42	schizophrenia || id:ieu-b-42	TRUE	reported	igd	2	TRUE	0.000640013	49.3728
rs7601312	G	A	G	A	0.058997	-0.064851	0.484	0.5278	FALSE	FALSE	FALSE	ieu-a-1082	2	229325525	0.08337	1187	0.4351	Thyroid cancer || id:ieu-a-1082	Thyroid cancer	Thyroid cancer || ||	TRUE	igd	2	229320093	0.0108	4.67e-08	77096	ieu-b-42	schizophrenia || id:ieu-b-42	TRUE	reported	igd	2	TRUE	0.000386912	29.8402
rs7819570	T	G	T	G	0.076498	0.0610951	0.207	0.2152	FALSE	FALSE	FALSE	ieu-a-1082	8	89615855	0.1015	1187	0.5465	Thyroid cancer || id:ieu-a-1082	Thyroid cancer	Thyroid cancer || ||	TRUE	igd	8	89588626	0.014	4.47e-08	77096	ieu-b-42	schizophrenia || id:ieu-b-42	TRUE	reported	igd	2	TRUE	0.000387119	29.8561
rs783540	G	A	G	A	0.059899	0.131905	0.43	0.4099	FALSE	FALSE	FALSE	ieu-a-1082	15	83318202	0.08481	1187	0.1197	Thyroid cancer || id:ieu-a-1082	Thyroid cancer	Thyroid cancer || ||	TRUE	igd	15	83254708	0.011	4.77e-08	77096	ieu-b-42	schizophrenia || id:ieu-b-42	TRUE	reported	igd	2	TRUE	0.000384463	29.6512
rs10108725	T	C	T	C	0.073204	0.0191161	0.222	NA	FALSE	FALSE	FALSE	ieu-a-822	8	4191202	0.0583346	3835	0.74267	Pancreatic cancer || id:ieu-a-822	Pancreatic cancer	Pancreatic cancer || ||	TRUE	igd	8	4191202	0.0133	3.32e-08	77096	ieu-b-42	schizophrenia || id:ieu-b-42	TRUE	reported	igd	2	TRUE	0.000392793	30.2939
rs1024582	G	A	G	A	-0.098904	-0.0146915	0.66	NA	FALSE	FALSE	FALSE	ieu-a-822	12	2408194	0.049994	3835	0.769005	Pancreatic cancer || id:ieu-a-822	Pancreatic cancer	Pancreatic cancer || ||	TRUE	igd	12	2402246	0.0115	6.27e-18	77096	ieu-b-42	schizophrenia || id:ieu-b-42	TRUE	reported	igd	2	TRUE	0.000958481	73.9641
rs10791097	G	T	G	T	-0.0766	-0.0224462	0.52	NA	FALSE	FALSE	FALSE	ieu-a-822	11	130718711	0.0478496	3835	0.639392	Pancreatic cancer || id:ieu-a-822	Pancreatic cancer	Pancreatic cancer || ||	TRUE	igd	11	130718630	0.0109	2.05e-12	77096	ieu-b-42	schizophrenia || id:ieu-b-42	TRUE	reported	igd	2	TRUE	0.000640169	49.3848
rs11027857	A	G	A	G	0.063998	-0.016267	0.587	NA	FALSE	FALSE	FALSE	ieu-a-822	11	24405921	0.0472713	3835	0.731235	Pancreatic cancer || id:ieu-a-822	Pancreatic cancer	Pancreatic cancer || ||	TRUE	igd	11	24403620	0.0109	3.67e-09	77096	ieu-b-42	schizophrenia || id:ieu-b-42	TRUE	reported	igd	2	TRUE	0.000446945	34.4722
rs1106568	A	G	A	G	-0.069404	-0.0185273	0.744	NA	FALSE	FALSE	FALSE	ieu-a-822	4	176861301	0.05623	3835	0.741727	Pancreatic cancer || id:ieu-a-822	Pancreatic cancer	Pancreatic cancer || ||	TRUE	igd	4	176861301	0.0125	2.85e-08	77096	ieu-b-42	schizophrenia || id:ieu-b-42	TRUE	reported	igd	2	TRUE	0.000399709	30.8275
rs11191419	A	T	A	T	-0.101601	-0.0490852	0.334	NA	FALSE	TRUE	TRUE	ieu-a-822	10	104618695	0.0501844	3835	0.328037	Pancreatic cancer || id:ieu-a-822	Pancreatic cancer	Pancreatic cancer || ||	TRUE	igd	10	104612335	0.0118	6.69e-18	77096	ieu-b-42	schizophrenia || id:ieu-b-42	TRUE	reported	igd	2	FALSE	0.000960689	74.1346
rs11210892	A	G	A	G	-0.067797	-0.0249853	0.652	NA	FALSE	FALSE	FALSE	ieu-a-822	1	44100084	0.0504488	3835	0.620029	Pancreatic cancer || id:ieu-a-822	Pancreatic cancer	Pancreatic cancer || ||	TRUE	igd	1	44100084	0.0115	3.42e-09	77096	ieu-b-42	schizophrenia || id:ieu-b-42	TRUE	reported	igd	2	TRUE	0.000450607	34.7547
rs11658257	C	G	C	G	-0.066204	-0.00219758	0.573	NA	FALSE	TRUE	TRUE	ieu-a-822	17	18029857	0.0511301	3835	0.966011	Pancreatic cancer || id:ieu-a-822	Pancreatic cancer	Pancreatic cancer || ||	TRUE	igd	17	17956459	0.0115	8.34e-09	77096	ieu-b-42	schizophrenia || id:ieu-b-42	TRUE	reported	igd	2	FALSE	0.000429689	33.1407
rs11682175	C	T	C	T	0.073496	-0.0294288	0.439	NA	FALSE	FALSE	FALSE	ieu-a-822	2	57987593	0.0480599	3835	0.53984	Pancreatic cancer || id:ieu-a-822	Pancreatic cancer	Pancreatic cancer || ||	TRUE	igd	2	57987593	0.0109	1.58e-11	77096	ieu-b-42	schizophrenia || id:ieu-b-42	TRUE	reported	igd	2	TRUE	0.000589368	45.4635
rs11693528	G	C	G	C	0.102797	-0.0191828	0.185	NA	FALSE	TRUE	TRUE	ieu-a-822	2	200751582	0.0605528	3835	0.751047	Pancreatic cancer || id:ieu-a-822	Pancreatic cancer	Pancreatic cancer || ||	TRUE	igd	2	200736507	0.0136	4.73e-14	77096	ieu-b-42	schizophrenia || id:ieu-b-42	TRUE	reported	igd	2	FALSE	0.000740508	57.131
rs1191551	G	T	G	T	-0.071697	0.0839252	0.784	NA	FALSE	FALSE	FALSE	ieu-a-822	14	30001675	0.0611431	3835	0.169495	Pancreatic cancer || id:ieu-a-822	Pancreatic cancer	Pancreatic cancer || ||	TRUE	igd	14	30000405	0.0131	4.21e-08	77096	ieu-b-42	schizophrenia || id:ieu-b-42	TRUE	reported	igd	2	TRUE	0.000388382	29.9535
rs12062861	A	G	A	G	-0.091096	0.015578	0.175	NA	FALSE	FALSE	FALSE	ieu-a-822	1	150143193	0.0647753	3835	0.809766	Pancreatic cancer || id:ieu-a-822	Pancreatic cancer	Pancreatic cancer || ||	TRUE	igd	1	150017281	0.0149	9.66e-10	77096	ieu-b-42	schizophrenia || id:ieu-b-42	TRUE	reported	igd	2	TRUE	0.0004846	37.3779
rs12887734	T	G	T	G	0.088304	-0.0104545	0.273	NA	FALSE	FALSE	FALSE	ieu-a-822	14	104092789	0.0522382	3835	0.84097	Pancreatic cancer || id:ieu-a-822	Pancreatic cancer	Pancreatic cancer || ||	TRUE	igd	14	104046834	0.0121	3.72e-13	77096	ieu-b-42	schizophrenia || id:ieu-b-42	TRUE	reported	igd	2	TRUE	0.000690332	53.2573
rs13240464	C	T	C	T	-0.080704	-0.0185714	0.379	NA	FALSE	FALSE	FALSE	ieu-a-822	7	111078912	0.0493527	3835	0.70675	Pancreatic cancer || id:ieu-a-822	Pancreatic cancer	Pancreatic cancer || ||	TRUE	igd	7	110898915	0.0116	3.12e-12	77096	ieu-b-42	schizophrenia || id:ieu-b-42	TRUE	reported	igd	2	TRUE	0.000627436	48.402
rs13261481	G	T	G	T	-0.062402	-0.0322736	0.591	NA	FALSE	FALSE	FALSE	ieu-a-822	8	60711404	0.0500595	3835	0.518808	Pancreatic cancer || id:ieu-a-822	Pancreatic cancer	Pancreatic cancer || ||	TRUE	igd	8	60701801	0.011	1.66e-08	77096	ieu-b-42	schizophrenia || id:ieu-b-42	TRUE	reported	igd	2	TRUE	0.000417252	32.1811
rs1615350	T	C	T	C	-0.0851	0.00863719	0.734	NA	FALSE	FALSE	FALSE	ieu-a-822	12	123719444	0.0557045	3835	0.876314	Pancreatic cancer || id:ieu-a-822	Pancreatic cancer	Pancreatic cancer || ||	TRUE	igd	12	123650335	0.0123	4.26e-12	77096	ieu-b-42	schizophrenia || id:ieu-b-42	TRUE	reported	igd	2	TRUE	0.000620508	47.8672
rs1702294	C	T	C	T	0.118401	0.145141	0.784	NA	FALSE	FALSE	FALSE	ieu-a-822	1	98502934	0.0597075	3835	0.0150062	Pancreatic cancer || id:ieu-a-822	Pancreatic cancer	Pancreatic cancer || ||	TRUE	igd	1	98501984	0.0138	1.03e-17	77096	ieu-b-42	schizophrenia || id:ieu-b-42	TRUE	reported	igd	2	TRUE	0.000953907	73.6108
rs17194490	T	G	T	G	0.0966	-0.0145047	0.165	NA	FALSE	FALSE	FALSE	ieu-a-822	3	2547786	0.0645347	3835	0.822173	Pancreatic cancer || id:ieu-a-822	Pancreatic cancer	Pancreatic cancer || ||	TRUE	igd	3	2547786	0.0148	6.38e-11	77096	ieu-b-42	schizophrenia || id:ieu-b-42	TRUE	reported	igd	2	TRUE	0.00055228	42.601
rs2053079	G	A	G	A	0.071797	0.0598714	0.265	NA	FALSE	FALSE	FALSE	ieu-a-822	19	30992639	0.0549418	3835	0.27594	Pancreatic cancer || id:ieu-a-822	Pancreatic cancer	Pancreatic cancer || ||	TRUE	igd	19	30987423	0.0127	1.74e-08	77096	ieu-b-42	schizophrenia || id:ieu-b-42	TRUE	reported	igd	2	TRUE	0.000414375	31.9591
rs2103655	A	G	A	G	0.0766	0.00040008	0.664	NA	FALSE	FALSE	FALSE	ieu-a-822	20	37453194	0.0502938	3835	0.994191	Pancreatic cancer || id:ieu-a-822	Pancreatic cancer	Pancreatic cancer || ||	TRUE	igd	20	37425958	0.0119	1.24e-10	77096	ieu-b-42	schizophrenia || id:ieu-b-42	TRUE	reported	igd	2	TRUE	0.000537154	41.4336
rs215411	A	T	A	T	0.0692	-0.103141	0.327	NA	FALSE	TRUE	TRUE	ieu-a-822	4	23424060	0.0508476	3835	0.0424923	Pancreatic cancer || id:ieu-a-822	Pancreatic cancer	Pancreatic cancer || ||	TRUE	igd	4	23423603	0.0115	1.68e-09	77096	ieu-b-42	schizophrenia || id:ieu-b-42	TRUE	reported	igd	2	FALSE	0.000469441	36.2081
rs2414718	A	G	A	G	0.069797	-0.040566	0.617	NA	FALSE	FALSE	FALSE	ieu-a-822	15	61863133	0.0482324	3835	0.400073	Pancreatic cancer || id:ieu-a-822	Pancreatic cancer	Pancreatic cancer || ||	TRUE	igd	15	61863133	0.011	1.98e-10	77096	ieu-b-42	schizophrenia || id:ieu-b-42	TRUE	reported	igd	2	TRUE	0.000521951	40.2603
rs2535627	C	T	C	T	-0.070403	-0.00581689	0.503	NA	FALSE	FALSE	FALSE	ieu-a-822	3	52845105	0.0471711	3835	0.901558	Pancreatic cancer || id:ieu-a-822	Pancreatic cancer	Pancreatic cancer || ||	TRUE	igd	3	52845105	0.0109	1.17e-10	77096	ieu-b-42	schizophrenia || id:ieu-b-42	TRUE	reported	igd	2	TRUE	0.000540832	41.7175
rs2693698	G	A	G	A	0.061705	0.0342809	0.551	NA	FALSE	FALSE	FALSE	ieu-a-822	14	99719219	0.048188	3835	0.476375	Pancreatic cancer || id:ieu-a-822	Pancreatic cancer	Pancreatic cancer || ||	TRUE	igd	14	99719219	0.0111	2.99e-08	77096	ieu-b-42	schizophrenia || id:ieu-b-42	TRUE	reported	igd	2	TRUE	0.000400672	30.9018
rs28681284	T	C	T	C	-0.101601	-0.0150121	0.214	NA	FALSE	FALSE	FALSE	ieu-a-822	15	78915245	0.0579609	3835	0.795482	Pancreatic cancer || id:ieu-a-822	Pancreatic cancer	Pancreatic cancer || ||	TRUE	igd	15	78908565	0.0141	6.35e-13	77096	ieu-b-42	schizophrenia || id:ieu-b-42	TRUE	reported	igd	2	TRUE	0.000673029	51.9214
rs2905432	A	G	A	G	-0.066001	0.0517144	0.671	NA	FALSE	FALSE	FALSE	ieu-a-822	19	19562332	0.0506893	3835	0.307868	Pancreatic cancer || id:ieu-a-822	Pancreatic cancer	Pancreatic cancer || ||	TRUE	igd	19	19484295	0.0114	7.51e-09	77096	ieu-b-42	schizophrenia || id:ieu-b-42	TRUE	reported	igd	2	TRUE	0.000434581	33.5182
rs301797	A	C	A	C	0.066097	0.0321767	0.322	NA	FALSE	FALSE	FALSE	ieu-a-822	1	8488565	0.0512958	3835	0.53069	Pancreatic cancer || id:ieu-a-822	Pancreatic cancer	Pancreatic cancer || ||	TRUE	igd	1	8487323	0.0116	1.2e-08	77096	ieu-b-42	schizophrenia || id:ieu-b-42	TRUE	reported	igd	2	TRUE	0.000420952	32.4666
rs34796896	A	G	A	G	-0.082198	0.0194104	0.194	NA	FALSE	FALSE	FALSE	ieu-a-822	3	180799879	0.0611258	3835	0.750587	Pancreatic cancer || id:ieu-a-822	Pancreatic cancer	Pancreatic cancer || ||	TRUE	igd	3	180623255	0.0135	1.23e-09	77096	ieu-b-42	schizophrenia || id:ieu-b-42	TRUE	reported	igd	2	TRUE	0.000480634	37.0718
rs35225200	C	A	C	A	0.144795	-0.104805	0.087	NA	FALSE	FALSE	FALSE	ieu-a-822	4	103188709	0.102706	3835	0.307157	Pancreatic cancer || id:ieu-a-822	Pancreatic cancer	Pancreatic cancer || ||	TRUE	igd	4	103146888	0.0203	9.56e-13	77096	ieu-b-42	schizophrenia || id:ieu-b-42	TRUE	reported	igd	2	TRUE	0.000659473	50.8749
rs35324223	G	A	G	A	0.091995	0.0710175	0.181	NA	FALSE	FALSE	FALSE	ieu-a-822	11	46491159	0.0651706	3835	0.275965	Pancreatic cancer || id:ieu-a-822	Pancreatic cancer	Pancreatic cancer || ||	TRUE	igd	11	46402852	0.0145	2.04e-10	77096	ieu-b-42	schizophrenia || id:ieu-b-42	TRUE	reported	igd	2	TRUE	0.000521836	40.2514
rs35998080	T	G	T	G	0.069004	0.0982151	0.45	NA	FALSE	FALSE	FALSE	ieu-a-822	1	73286806	0.0474267	3835	0.0382067	Pancreatic cancer || id:ieu-a-822	Pancreatic cancer	Pancreatic cancer || ||	TRUE	igd	1	73278615	0.0112	6.95e-10	77096	ieu-b-42	schizophrenia || id:ieu-b-42	TRUE	reported	igd	2	TRUE	0.000492115	37.9578
rs36068923	G	A	G	A	0.083501	-0.0203048	0.187	NA	FALSE	FALSE	FALSE	ieu-a-822	8	111547789	0.0588105	3835	0.729582	Pancreatic cancer || id:ieu-a-822	Pancreatic cancer	Pancreatic cancer || ||	TRUE	igd	8	111485761	0.0134	4.14e-10	77096	ieu-b-42	schizophrenia || id:ieu-b-42	TRUE	reported	igd	2	TRUE	0.000503412	38.8296
rs3798869	A	G	A	G	-0.066802	0.0932171	0.464	NA	FALSE	FALSE	FALSE	ieu-a-822	6	84398565	0.0483817	3835	0.0539026	Pancreatic cancer || id:ieu-a-822	Pancreatic cancer	Pancreatic cancer || ||	TRUE	igd	6	84328660	0.011	1.09e-09	77096	ieu-b-42	schizophrenia || id:ieu-b-42	TRUE	reported	igd	2	TRUE	0.000478139	36.8793
rs3849046	T	C	T	C	0.062496	0.034074	0.508	NA	FALSE	FALSE	FALSE	ieu-a-822	5	137851192	0.0480719	3835	0.478193	Pancreatic cancer || id:ieu-a-822	Pancreatic cancer	Pancreatic cancer || ||	TRUE	igd	5	137851192	0.0109	1.04e-08	77096	ieu-b-42	schizophrenia || id:ieu-b-42	TRUE	reported	igd	2	TRUE	0.000426221	32.8731
rs4129585	C	A	C	A	-0.079301	-0.0430595	0.558	NA	FALSE	FALSE	FALSE	ieu-a-822	8	143312933	0.0485539	3835	0.375295	Pancreatic cancer || id:ieu-a-822	Pancreatic cancer	Pancreatic cancer || ||	TRUE	igd	8	143312933	0.0109	3.61e-13	77096	ieu-b-42	schizophrenia || id:ieu-b-42	TRUE	reported	igd	2	TRUE	0.000686079	52.9289
rs4391122	G	A	G	A	0.078005	0.0195085	0.462	NA	FALSE	FALSE	FALSE	ieu-a-822	5	60642595	0.047214	3835	0.678949	Pancreatic cancer || id:ieu-a-822	Pancreatic cancer	Pancreatic cancer || ||	TRUE	igd	5	60598543	0.0109	8.9e-13	77096	ieu-b-42	schizophrenia || id:ieu-b-42	TRUE	reported	igd	2	TRUE	0.000663853	51.213
rs4648845	T	C	T	C	0.067201	0.0248051	0.479	NA	FALSE	FALSE	FALSE	ieu-a-822	1	2390588	0.0471599	3835	0.599006	Pancreatic cancer || id:ieu-a-822	Pancreatic cancer	Pancreatic cancer || ||	TRUE	igd	1	2387101	0.0119	1.74e-08	77096	ieu-b-42	schizophrenia || id:ieu-b-42	TRUE	reported	igd	2	TRUE	0.000413472	31.8894
rs4702	A	G	A	G	-0.080505	-0.138631	0.574	NA	FALSE	FALSE	FALSE	ieu-a-822	15	91426560	0.0483392	3835	0.0041061	Pancreatic cancer || id:ieu-a-822	Pancreatic cancer	Pancreatic cancer || ||	TRUE	igd	15	91426560	0.0115	2.62e-12	77096	ieu-b-42	schizophrenia || id:ieu-b-42	TRUE	reported	igd	2	TRUE	0.000635246	49.0048
rs55775495	T	C	T	C	-0.068996	-0.0236189	0.701	NA	FALSE	FALSE	FALSE	ieu-a-822	2	198478320	0.0510413	3835	0.643655	Pancreatic cancer || id:ieu-a-822	Pancreatic cancer	Pancreatic cancer || ||	TRUE	igd	2	198245965	0.0114	1.56e-09	77096	ieu-b-42	schizophrenia || id:ieu-b-42	TRUE	reported	igd	2	TRUE	0.000474898	36.6292
rs6439649	T	G	T	G	0.070999	-0.00876151	0.562	NA	FALSE	FALSE	FALSE	ieu-a-822	3	136489563	0.0478725	3835	0.854024	Pancreatic cancer || id:ieu-a-822	Pancreatic cancer	Pancreatic cancer || ||	TRUE	igd	3	136371691	0.0111	1.37e-10	77096	ieu-b-42	schizophrenia || id:ieu-b-42	TRUE	reported	igd	2	TRUE	0.000530391	40.9117
rs6704768	A	G	A	G	-0.0766	0.0426988	0.529	NA	FALSE	FALSE	FALSE	ieu-a-822	2	233597196	0.0475605	3835	0.369374	Pancreatic cancer || id:ieu-a-822	Pancreatic cancer	Pancreatic cancer || ||	TRUE	igd	2	233592501	0.0109	2.06e-12	77096	ieu-b-42	schizophrenia || id:ieu-b-42	TRUE	reported	igd	2	TRUE	0.000640169	49.3848
rs73036062	A	G	A	G	-0.089104	0.0445909	0.21	NA	FALSE	FALSE	FALSE	ieu-a-822	11	133840412	0.0571644	3835	0.435049	Pancreatic cancer || id:ieu-a-822	Pancreatic cancer	Pancreatic cancer || ||	TRUE	igd	11	133828187	0.0135	3.68e-11	77096	ieu-b-42	schizophrenia || id:ieu-b-42	TRUE	reported	igd	2	TRUE	0.000564741	43.5628
rs75968099	T	C	T	C	0.080104	0.0571362	0.351	NA	FALSE	FALSE	FALSE	ieu-a-822	3	36878970	0.0495546	3835	0.248659	Pancreatic cancer || id:ieu-a-822	Pancreatic cancer	Pancreatic cancer || ||	TRUE	igd	3	36858583	0.0114	2.31e-12	77096	ieu-b-42	schizophrenia || id:ieu-b-42	TRUE	reported	igd	2	TRUE	0.000640013	49.3728
rs7601312	G	A	G	A	0.058997	0.0280042	0.484	NA	FALSE	FALSE	FALSE	ieu-a-822	2	229324680	0.0475069	3835	0.554858	Pancreatic cancer || id:ieu-a-822	Pancreatic cancer	Pancreatic cancer || ||	TRUE	igd	2	229320093	0.0108	4.67e-08	77096	ieu-b-42	schizophrenia || id:ieu-b-42	TRUE	reported	igd	2	TRUE	0.000386912	29.8402
rs7819570	T	G	T	G	0.076498	-0.0144032	0.207	NA	FALSE	FALSE	FALSE	ieu-a-822	8	89615855	0.0646847	3835	0.823314	Pancreatic cancer || id:ieu-a-822	Pancreatic cancer	Pancreatic cancer || ||	TRUE	igd	8	89588626	0.014	4.47e-08	77096	ieu-b-42	schizophrenia || id:ieu-b-42	TRUE	reported	igd	2	TRUE	0.000387119	29.8561
rs783540	G	A	G	A	0.059899	0.0110388	0.43	NA	FALSE	FALSE	FALSE	ieu-a-822	15	83254708	0.0485974	3835	0.821048	Pancreatic cancer || id:ieu-a-822	Pancreatic cancer	Pancreatic cancer || ||	TRUE	igd	15	83254708	0.011	4.77e-08	77096	ieu-b-42	schizophrenia || id:ieu-b-42	TRUE	reported	igd	2	TRUE	0.000384463	29.6512
rs7893279	G	T	G	T	-0.1124	0.0485997	0.125	NA	FALSE	FALSE	FALSE	ieu-a-822	10	18745105	0.0741669	3835	0.512216	Pancreatic cancer || id:ieu-a-822	Pancreatic cancer	Pancreatic cancer || ||	TRUE	igd	10	18745105	0.0175	1.24e-10	77096	ieu-b-42	schizophrenia || id:ieu-b-42	TRUE	reported	igd	2	TRUE	0.000534801	41.252
rs10108725	T	C	T	C	0.073204	0.0334348	0.222	NA	FALSE	FALSE	FALSE	ieu-a-816	8	4191202	0.0540568	4881	0.5316	Neuroblastoma || id:ieu-a-816	Neuroblastoma	Neuroblastoma || ||	TRUE	igd	8	4191202	0.0133	3.32e-08	77096	ieu-b-42	schizophrenia || id:ieu-b-42	TRUE	reported	igd	2	TRUE	0.000392793	30.2939
rs1024582	G	A	G	A	-0.098904	-0.00995033	0.66	NA	FALSE	FALSE	FALSE	ieu-a-816	12	2408194	0.0455796	4881	0.8199	Neuroblastoma || id:ieu-a-816	Neuroblastoma	Neuroblastoma || ||	TRUE	igd	12	2402246	0.0115	6.27e-18	77096	ieu-b-42	schizophrenia || id:ieu-b-42	TRUE	reported	igd	2	TRUE	0.000958481	73.9641
rs10791097	G	T	G	T	-0.0766	0.0910194	0.52	NA	FALSE	FALSE	FALSE	ieu-a-816	11	130718711	0.0431439	4881	0.0350002	Neuroblastoma || id:ieu-a-816	Neuroblastoma	Neuroblastoma || ||	TRUE	igd	11	130718630	0.0109	2.05e-12	77096	ieu-b-42	schizophrenia || id:ieu-b-42	TRUE	reported	igd	2	TRUE	0.000640169	49.3848
rs11027857	A	G	A	G	0.063998	0.0307685	0.587	NA	FALSE	FALSE	FALSE	ieu-a-816	11	24405921	0.0429568	4881	0.4742	Neuroblastoma || id:ieu-a-816	Neuroblastoma	Neuroblastoma || ||	TRUE	igd	11	24403620	0.0109	3.67e-09	77096	ieu-b-42	schizophrenia || id:ieu-b-42	TRUE	reported	igd	2	TRUE	0.000446945	34.4722
rs1106568	A	G	A	G	-0.069404	-0.0446836	0.744	NA	FALSE	FALSE	FALSE	ieu-a-816	4	176861301	0.0505428	4881	0.3758	Neuroblastoma || id:ieu-a-816	Neuroblastoma	Neuroblastoma || ||	TRUE	igd	4	176861301	0.0125	2.85e-08	77096	ieu-b-42	schizophrenia || id:ieu-b-42	TRUE	reported	igd	2	TRUE	0.000399709	30.8275
rs11191419	A	T	A	T	-0.101601	-0.0256677	0.334	NA	FALSE	TRUE	TRUE	ieu-a-816	10	104618695	0.0448307	4881	0.568801	Neuroblastoma || id:ieu-a-816	Neuroblastoma	Neuroblastoma || ||	TRUE	igd	10	104612335	0.0118	6.69e-18	77096	ieu-b-42	schizophrenia || id:ieu-b-42	TRUE	reported	igd	2	FALSE	0.000960689	74.1346
rs11210892	A	G	A	G	-0.067797	0.00697561	0.652	NA	FALSE	FALSE	FALSE	ieu-a-816	1	44100084	0.0457887	4881	0.8859	Neuroblastoma || id:ieu-a-816	Neuroblastoma	Neuroblastoma || ||	TRUE	igd	1	44100084	0.0115	3.42e-09	77096	ieu-b-42	schizophrenia || id:ieu-b-42	TRUE	reported	igd	2	TRUE	0.000450607	34.7547
rs11658257	C	G	C	G	-0.066204	-0.001998	0.573	NA	FALSE	TRUE	TRUE	ieu-a-816	17	18029857	0.0459995	4881	0.9589	Neuroblastoma || id:ieu-a-816	Neuroblastoma	Neuroblastoma || ||	TRUE	igd	17	17956459	0.0115	8.34e-09	77096	ieu-b-42	schizophrenia || id:ieu-b-42	TRUE	reported	igd	2	FALSE	0.000429689	33.1407
rs11682175	C	T	C	T	0.073496	0.0502412	0.439	NA	FALSE	FALSE	FALSE	ieu-a-816	2	57987593	0.0431317	4881	0.2428	Neuroblastoma || id:ieu-a-816	Neuroblastoma	Neuroblastoma || ||	TRUE	igd	2	57987593	0.0109	1.58e-11	77096	ieu-b-42	schizophrenia || id:ieu-b-42	TRUE	reported	igd	2	TRUE	0.000589368	45.4635
rs11693528	G	C	G	C	0.102797	-0.0109399	0.185	NA	FALSE	TRUE	TRUE	ieu-a-816	2	200751582	0.0545264	4881	0.8414	Neuroblastoma || id:ieu-a-816	Neuroblastoma	Neuroblastoma || ||	TRUE	igd	2	200736507	0.0136	4.73e-14	77096	ieu-b-42	schizophrenia || id:ieu-b-42	TRUE	reported	igd	2	FALSE	0.000740508	57.131
rs1191551	G	T	G	T	-0.071697	-0.0535408	0.784	NA	FALSE	FALSE	FALSE	ieu-a-816	14	30001675	0.0533818	4881	0.3185	Neuroblastoma || id:ieu-a-816	Neuroblastoma	Neuroblastoma || ||	TRUE	igd	14	30000405	0.0131	4.21e-08	77096	ieu-b-42	schizophrenia || id:ieu-b-42	TRUE	reported	igd	2	TRUE	0.000388382	29.9535
rs12062861	A	G	A	G	-0.091096	0.0261387	0.175	NA	FALSE	FALSE	FALSE	ieu-a-816	1	150143193	0.0581831	4881	0.652299	Neuroblastoma || id:ieu-a-816	Neuroblastoma	Neuroblastoma || ||	TRUE	igd	1	150017281	0.0149	9.66e-10	77096	ieu-b-42	schizophrenia || id:ieu-b-42	TRUE	reported	igd	2	TRUE	0.0004846	37.3779
rs12887734	T	G	T	G	0.088304	0.0657877	0.273	NA	FALSE	FALSE	FALSE	ieu-a-816	14	104092789	0.0484896	4881	0.1723	Neuroblastoma || id:ieu-a-816	Neuroblastoma	Neuroblastoma || ||	TRUE	igd	14	104046834	0.0121	3.72e-13	77096	ieu-b-42	schizophrenia || id:ieu-b-42	TRUE	reported	igd	2	TRUE	0.000690332	53.2573
rs13240464	C	T	C	T	-0.080704	0.00230265	0.379	NA	FALSE	FALSE	FALSE	ieu-a-816	7	111078912	0.0452313	4881	0.96	Neuroblastoma || id:ieu-a-816	Neuroblastoma	Neuroblastoma || ||	TRUE	igd	7	110898915	0.0116	3.12e-12	77096	ieu-b-42	schizophrenia || id:ieu-b-42	TRUE	reported	igd	2	TRUE	0.000627436	48.402
rs13261481	G	T	G	T	-0.062402	0.0148886	0.591	NA	FALSE	FALSE	FALSE	ieu-a-816	8	60711404	0.0440886	4881	0.7322	Neuroblastoma || id:ieu-a-816	Neuroblastoma	Neuroblastoma || ||	TRUE	igd	8	60701801	0.011	1.66e-08	77096	ieu-b-42	schizophrenia || id:ieu-b-42	TRUE	reported	igd	2	TRUE	0.000417252	32.1811
rs1615350	T	C	T	C	-0.0851	0.08158	0.734	NA	FALSE	FALSE	FALSE	ieu-a-816	12	123719444	0.0484338	4881	0.0921001	Neuroblastoma || id:ieu-a-816	Neuroblastoma	Neuroblastoma || ||	TRUE	igd	12	123650335	0.0123	4.26e-12	77096	ieu-b-42	schizophrenia || id:ieu-b-42	TRUE	reported	igd	2	TRUE	0.000620508	47.8672
rs1702294	C	T	C	T	0.118401	-0.0180621	0.784	NA	FALSE	FALSE	FALSE	ieu-a-816	1	98502934	0.0555593	4881	0.7456	Neuroblastoma || id:ieu-a-816	Neuroblastoma	Neuroblastoma || ||	TRUE	igd	1	98501984	0.0138	1.03e-17	77096	ieu-b-42	schizophrenia || id:ieu-b-42	TRUE	reported	igd	2	TRUE	0.000953907	73.6108
rs17194490	T	G	T	G	0.0966	-0.0423857	0.165	NA	FALSE	FALSE	FALSE	ieu-a-816	3	2547786	0.0581446	4881	0.4667	Neuroblastoma || id:ieu-a-816	Neuroblastoma	Neuroblastoma || ||	TRUE	igd	3	2547786	0.0148	6.38e-11	77096	ieu-b-42	schizophrenia || id:ieu-b-42	TRUE	reported	igd	2	TRUE	0.00055228	42.601
rs2053079	G	A	G	A	0.071797	-0.0129162	0.265	NA	FALSE	FALSE	FALSE	ieu-a-816	19	30992639	0.0481662	4881	0.791099	Neuroblastoma || id:ieu-a-816	Neuroblastoma	Neuroblastoma || ||	TRUE	igd	19	30987423	0.0127	1.74e-08	77096	ieu-b-42	schizophrenia || id:ieu-b-42	TRUE	reported	igd	2	TRUE	0.000414375	31.9591
rs2103655	A	G	A	G	0.0766	-0.0188218	0.664	NA	FALSE	FALSE	FALSE	ieu-a-816	20	37453194	0.0454776	4881	0.6782	Neuroblastoma || id:ieu-a-816	Neuroblastoma	Neuroblastoma || ||	TRUE	igd	20	37425958	0.0119	1.24e-10	77096	ieu-b-42	schizophrenia || id:ieu-b-42	TRUE	reported	igd	2	TRUE	0.000537154	41.4336
rs215411	A	T	A	T	0.0692	0.0248051	0.327	NA	FALSE	TRUE	TRUE	ieu-a-816	4	23424060	0.0457276	4881	0.5874	Neuroblastoma || id:ieu-a-816	Neuroblastoma	Neuroblastoma || ||	TRUE	igd	4	23423603	0.0115	1.68e-09	77096	ieu-b-42	schizophrenia || id:ieu-b-42	TRUE	reported	igd	2	FALSE	0.000469441	36.2081
rs2414718	A	G	A	G	0.069797	0.0305292	0.617	NA	FALSE	FALSE	FALSE	ieu-a-816	15	61863133	0.0437542	4881	0.4893	Neuroblastoma || id:ieu-a-816	Neuroblastoma	Neuroblastoma || ||	TRUE	igd	15	61863133	0.011	1.98e-10	77096	ieu-b-42	schizophrenia || id:ieu-b-42	TRUE	reported	igd	2	TRUE	0.000521951	40.2603
rs2535627	C	T	C	T	-0.070403	0.00631993	0.503	NA	FALSE	FALSE	FALSE	ieu-a-816	3	52845105	0.0432962	4881	0.8842	Neuroblastoma || id:ieu-a-816	Neuroblastoma	Neuroblastoma || ||	TRUE	igd	3	52845105	0.0109	1.17e-10	77096	ieu-b-42	schizophrenia || id:ieu-b-42	TRUE	reported	igd	2	TRUE	0.000540832	41.7175
rs2693698	G	A	G	A	0.061705	0.0253178	0.551	NA	FALSE	FALSE	FALSE	ieu-a-816	14	99719219	0.043176	4881	0.5576	Neuroblastoma || id:ieu-a-816	Neuroblastoma	Neuroblastoma || ||	TRUE	igd	14	99719219	0.0111	2.99e-08	77096	ieu-b-42	schizophrenia || id:ieu-b-42	TRUE	reported	igd	2	TRUE	0.000400672	30.9018
rs28681284	T	C	T	C	-0.101601	0.0324672	0.214	NA	FALSE	FALSE	FALSE	ieu-a-816	15	78915245	0.0519011	4881	0.5271	Neuroblastoma || id:ieu-a-816	Neuroblastoma	Neuroblastoma || ||	TRUE	igd	15	78908565	0.0141	6.35e-13	77096	ieu-b-42	schizophrenia || id:ieu-b-42	TRUE	reported	igd	2	TRUE	0.000673029	51.9214
rs2905432	A	G	A	G	-0.066001	-0.0618754	0.671	NA	FALSE	FALSE	FALSE	ieu-a-816	19	19619542	0.0451234	4881	0.1695	Neuroblastoma || id:ieu-a-816	Neuroblastoma	Neuroblastoma || ||	TRUE	igd	19	19484295	0.0114	7.51e-09	77096	ieu-b-42	schizophrenia || id:ieu-b-42	TRUE	reported	igd	2	TRUE	0.000434581	33.5182
rs301797	A	C	A	C	0.066097	-0.0459289	0.322	NA	FALSE	FALSE	FALSE	ieu-a-816	1	8488565	0.0462794	4881	0.3166	Neuroblastoma || id:ieu-a-816	Neuroblastoma	Neuroblastoma || ||	TRUE	igd	1	8487323	0.0116	1.2e-08	77096	ieu-b-42	schizophrenia || id:ieu-b-42	TRUE	reported	igd	2	TRUE	0.000420952	32.4666
rs34796896	A	G	A	G	-0.082198	-0.136278	0.194	NA	FALSE	FALSE	FALSE	ieu-a-816	3	180799879	0.0532931	4881	0.01041	Neuroblastoma || id:ieu-a-816	Neuroblastoma	Neuroblastoma || ||	TRUE	igd	3	180623255	0.0135	1.23e-09	77096	ieu-b-42	schizophrenia || id:ieu-b-42	TRUE	reported	igd	2	TRUE	0.000480634	37.0718
rs35225200	C	A	C	A	0.144795	0.0285875	0.087	NA	FALSE	FALSE	FALSE	ieu-a-816	4	103188709	0.0763226	4881	0.7074	Neuroblastoma || id:ieu-a-816	Neuroblastoma	Neuroblastoma || ||	TRUE	igd	4	103146888	0.0203	9.56e-13	77096	ieu-b-42	schizophrenia || id:ieu-b-42	TRUE	reported	igd	2	TRUE	0.000659473	50.8749
rs35324223	G	A	G	A	0.091995	0.00796817	0.181	NA	FALSE	FALSE	FALSE	ieu-a-816	11	46491159	0.0575754	4881	0.8944	Neuroblastoma || id:ieu-a-816	Neuroblastoma	Neuroblastoma || ||	TRUE	igd	11	46402852	0.0145	2.04e-10	77096	ieu-b-42	schizophrenia || id:ieu-b-42	TRUE	reported	igd	2	TRUE	0.000521836	40.2514
rs35998080	T	G	T	G	0.069004	-0.102557	0.45	NA	FALSE	FALSE	FALSE	ieu-a-816	1	73286806	0.0432319	4881	0.0176401	Neuroblastoma || id:ieu-a-816	Neuroblastoma	Neuroblastoma || ||	TRUE	igd	1	73278615	0.0112	6.95e-10	77096	ieu-b-42	schizophrenia || id:ieu-b-42	TRUE	reported	igd	2	TRUE	0.000492115	37.9578
rs36068923	G	A	G	A	0.083501	-0.0459289	0.187	NA	FALSE	FALSE	FALSE	ieu-a-816	8	111547789	0.0539827	4881	0.3923	Neuroblastoma || id:ieu-a-816	Neuroblastoma	Neuroblastoma || ||	TRUE	igd	8	111485761	0.0134	4.14e-10	77096	ieu-b-42	schizophrenia || id:ieu-b-42	TRUE	reported	igd	2	TRUE	0.000503412	38.8296
rs3798869	A	G	A	G	-0.066802	0.0158733	0.464	NA	FALSE	FALSE	FALSE	ieu-a-816	6	84354101	0.0434202	4881	0.7171	Neuroblastoma || id:ieu-a-816	Neuroblastoma	Neuroblastoma || ||	TRUE	igd	6	84328660	0.011	1.09e-09	77096	ieu-b-42	schizophrenia || id:ieu-b-42	TRUE	reported	igd	2	TRUE	0.000478139	36.8793
rs3849046	T	C	T	C	0.062496	-0.0732161	0.508	NA	FALSE	FALSE	FALSE	ieu-a-816	5	137851192	0.0433341	4881	0.0905399	Neuroblastoma || id:ieu-a-816	Neuroblastoma	Neuroblastoma || ||	TRUE	igd	5	137851192	0.0109	1.04e-08	77096	ieu-b-42	schizophrenia || id:ieu-b-42	TRUE	reported	igd	2	TRUE	0.000426221	32.8731
rs4129585	C	A	C	A	-0.079301	0.0508723	0.558	NA	FALSE	FALSE	FALSE	ieu-a-816	8	143312933	0.0430895	4881	0.2385	Neuroblastoma || id:ieu-a-816	Neuroblastoma	Neuroblastoma || ||	TRUE	igd	8	143312933	0.0109	3.61e-13	77096	ieu-b-42	schizophrenia || id:ieu-b-42	TRUE	reported	igd	2	TRUE	0.000686079	52.9289
rs4391122	G	A	G	A	0.078005	0.0188218	0.462	NA	FALSE	FALSE	FALSE	ieu-a-816	5	60642595	0.0430742	4881	0.6591	Neuroblastoma || id:ieu-a-816	Neuroblastoma	Neuroblastoma || ||	TRUE	igd	5	60598543	0.0109	8.9e-13	77096	ieu-b-42	schizophrenia || id:ieu-b-42	TRUE	reported	igd	2	TRUE	0.000663853	51.213
rs4648845	T	C	T	C	0.067201	0.0501361	0.479	NA	FALSE	FALSE	FALSE	ieu-a-816	1	2390588	0.0431025	4881	0.2439	Neuroblastoma || id:ieu-a-816	Neuroblastoma	Neuroblastoma || ||	TRUE	igd	1	2387101	0.0119	1.74e-08	77096	ieu-b-42	schizophrenia || id:ieu-b-42	TRUE	reported	igd	2	TRUE	0.000413472	31.8894
rs4702	A	G	A	G	-0.080505	-0.00823381	0.574	NA	FALSE	FALSE	FALSE	ieu-a-816	15	91426560	0.0430633	4881	0.8496	Neuroblastoma || id:ieu-a-816	Neuroblastoma	Neuroblastoma || ||	TRUE	igd	15	91426560	0.0115	2.62e-12	77096	ieu-b-42	schizophrenia || id:ieu-b-42	TRUE	reported	igd	2	TRUE	0.000635246	49.0048
rs55775495	T	C	T	C	-0.068996	-0.0272684	0.701	NA	FALSE	FALSE	FALSE	ieu-a-816	2	198478320	0.0466351	4881	0.558799	Neuroblastoma || id:ieu-a-816	Neuroblastoma	Neuroblastoma || ||	TRUE	igd	2	198245965	0.0114	1.56e-09	77096	ieu-b-42	schizophrenia || id:ieu-b-42	TRUE	reported	igd	2	TRUE	0.000474898	36.6292
rs6439649	T	G	T	G	0.070999	0.0109399	0.562	NA	FALSE	FALSE	FALSE	ieu-a-816	3	136489563	0.0440043	4881	0.8016	Neuroblastoma || id:ieu-a-816	Neuroblastoma	Neuroblastoma || ||	TRUE	igd	3	136371691	0.0111	1.37e-10	77096	ieu-b-42	schizophrenia || id:ieu-b-42	TRUE	reported	igd	2	TRUE	0.000530391	40.9117
rs6704768	A	G	A	G	-0.0766	0.0324672	0.529	NA	FALSE	FALSE	FALSE	ieu-a-816	2	233597196	0.0431735	4881	0.4536	Neuroblastoma || id:ieu-a-816	Neuroblastoma	Neuroblastoma || ||	TRUE	igd	2	233592501	0.0109	2.06e-12	77096	ieu-b-42	schizophrenia || id:ieu-b-42	TRUE	reported	igd	2	TRUE	0.000640169	49.3848
rs73036062	A	G	A	G	-0.089104	0.0148886	0.21	NA	FALSE	FALSE	FALSE	ieu-a-816	11	133840412	0.0528229	4881	0.7732	Neuroblastoma || id:ieu-a-816	Neuroblastoma	Neuroblastoma || ||	TRUE	igd	11	133828187	0.0135	3.68e-11	77096	ieu-b-42	schizophrenia || id:ieu-b-42	TRUE	reported	igd	2	TRUE	0.000564741	43.5628
rs75968099	T	C	T	C	0.080104	-0.00498754	0.351	NA	FALSE	FALSE	FALSE	ieu-a-816	3	36878970	0.0459634	4881	0.9214	Neuroblastoma || id:ieu-a-816	Neuroblastoma	Neuroblastoma || ||	TRUE	igd	3	36858583	0.0114	2.31e-12	77096	ieu-b-42	schizophrenia || id:ieu-b-42	TRUE	reported	igd	2	TRUE	0.000640013	49.3728
rs7601312	G	A	G	A	0.058997	0.00498754	0.484	NA	FALSE	FALSE	FALSE	ieu-a-816	2	229324680	0.0429046	4881	0.9074	Neuroblastoma || id:ieu-a-816	Neuroblastoma	Neuroblastoma || ||	TRUE	igd	2	229320093	0.0108	4.67e-08	77096	ieu-b-42	schizophrenia || id:ieu-b-42	TRUE	reported	igd	2	TRUE	0.000386912	29.8402
rs7819570	T	G	T	G	0.076498	-0.00541463	0.207	NA	FALSE	FALSE	FALSE	ieu-a-816	8	89615855	0.0572971	4881	0.9241	Neuroblastoma || id:ieu-a-816	Neuroblastoma	Neuroblastoma || ||	TRUE	igd	8	89588626	0.014	4.47e-08	77096	ieu-b-42	schizophrenia || id:ieu-b-42	TRUE	reported	igd	2	TRUE	0.000387119	29.8561
rs783540	G	A	G	A	0.059899	-0.00498754	0.43	NA	FALSE	FALSE	FALSE	ieu-a-816	15	83254708	0.0444613	4881	0.9177	Neuroblastoma || id:ieu-a-816	Neuroblastoma	Neuroblastoma || ||	TRUE	igd	15	83254708	0.011	4.77e-08	77096	ieu-b-42	schizophrenia || id:ieu-b-42	TRUE	reported	igd	2	TRUE	0.000384463	29.6512
rs7893279	G	T	G	T	-0.1124	-0.0344014	0.125	NA	FALSE	FALSE	FALSE	ieu-a-816	10	18745105	0.0678096	4881	0.611899	Neuroblastoma || id:ieu-a-816	Neuroblastoma	Neuroblastoma || ||	TRUE	igd	10	18745105	0.0175	1.24e-10	77096	ieu-b-42	schizophrenia || id:ieu-b-42	TRUE	reported	igd	2	TRUE	0.000534801	41.252
rs10108725	T	C	T	C	0.073204	-0.746548	0.222	0.224983	FALSE	FALSE	FALSE	ieu-a-1057	8	4191202	0.344	899	0.0297002	Gallbladder cancer || id:ieu-a-1057	Gallbladder cancer	Gallbladder cancer || ||	TRUE	igd	8	4191202	0.0133	3.32e-08	77096	ieu-b-42	schizophrenia || id:ieu-b-42	TRUE	reported	igd	2	TRUE	0.000392793	30.2939
rs1024582	G	A	G	A	-0.098904	-0.674983	0.66	0.958632	FALSE	FALSE	FALSE	ieu-a-1057	12	2408194	0.459	899	0.1415	Gallbladder cancer || id:ieu-a-1057	Gallbladder cancer	Gallbladder cancer || ||	TRUE	igd	12	2402246	0.0115	6.27e-18	77096	ieu-b-42	schizophrenia || id:ieu-b-42	TRUE	reported	igd	2	TRUE	0.000958481	73.9641
rs10791097	G	T	G	T	-0.0766	-0.492254	0.52	0.514527	FALSE	FALSE	FALSE	ieu-a-1057	11	130718711	0.245	899	0.04458	Gallbladder cancer || id:ieu-a-1057	Gallbladder cancer	Gallbladder cancer || ||	TRUE	igd	11	130718630	0.0109	2.05e-12	77096	ieu-b-42	schizophrenia || id:ieu-b-42	TRUE	reported	igd	2	TRUE	0.000640169	49.3848
rs11027857	A	G	A	G	0.063998	-1.16155	0.587	0.0677197	FALSE	FALSE	FALSE	ieu-a-1057	11	24405921	0.741	899	0.1168	Gallbladder cancer || id:ieu-a-1057	Gallbladder cancer	Gallbladder cancer || ||	TRUE	igd	11	24403620	0.0109	3.67e-09	77096	ieu-b-42	schizophrenia || id:ieu-b-42	TRUE	reported	igd	2	TRUE	0.000446945	34.4722
rs1106568	A	G	A	G	-0.069404	0.24718	0.744	0.78228	FALSE	FALSE	FALSE	ieu-a-1057	4	176861301	0.302	899	0.4137	Gallbladder cancer || id:ieu-a-1057	Gallbladder cancer	Gallbladder cancer || ||	TRUE	igd	4	176861301	0.0125	2.85e-08	77096	ieu-b-42	schizophrenia || id:ieu-b-42	TRUE	reported	igd	2	TRUE	0.000399709	30.8275
rs11191419	A	T	A	T	-0.101601	-0.455706	0.334	0.415895	FALSE	TRUE	FALSE	ieu-a-1057	10	104618695	0.254	899	0.0717398	Gallbladder cancer || id:ieu-a-1057	Gallbladder cancer	Gallbladder cancer || ||	TRUE	igd	10	104612335	0.0118	6.69e-18	77096	ieu-b-42	schizophrenia || id:ieu-b-42	TRUE	reported	igd	2	TRUE	0.000960689	74.1346
rs11210892	A	G	A	G	-0.067797	0.277072	0.652	0.602736	FALSE	FALSE	FALSE	ieu-a-1057	1	44100084	0.234	899	0.2357	Gallbladder cancer || id:ieu-a-1057	Gallbladder cancer	Gallbladder cancer || ||	TRUE	igd	1	44100084	0.0115	3.42e-09	77096	ieu-b-42	schizophrenia || id:ieu-b-42	TRUE	reported	igd	2	TRUE	0.000450607	34.7547
rs11658257	C	G	C	G	-0.066204	0.553385	0.573	0.665022	FALSE	TRUE	TRUE	ieu-a-1057	17	18029857	0.273	898	0.0424199	Gallbladder cancer || id:ieu-a-1057	Gallbladder cancer	Gallbladder cancer || ||	TRUE	igd	17	17956459	0.0115	8.34e-09	77096	ieu-b-42	schizophrenia || id:ieu-b-42	TRUE	reported	igd	2	FALSE	0.000429689	33.1407
rs11682175	C	T	C	T	0.073496	0.0217615	0.439	0.44	FALSE	FALSE	FALSE	ieu-a-1057	2	57987593	0.232	899	0.9245	Gallbladder cancer || id:ieu-a-1057	Gallbladder cancer	Gallbladder cancer || ||	TRUE	igd	2	57987593	0.0109	1.58e-11	77096	ieu-b-42	schizophrenia || id:ieu-b-42	TRUE	reported	igd	2	TRUE	0.000589368	45.4635
rs11693528	G	C	G	C	0.102797	0.484892	0.185	0.213192	FALSE	TRUE	FALSE	ieu-a-1057	2	200751582	0.27	899	0.0720294	Gallbladder cancer || id:ieu-a-1057	Gallbladder cancer	Gallbladder cancer || ||	TRUE	igd	2	200736507	0.0136	4.73e-14	77096	ieu-b-42	schizophrenia || id:ieu-b-42	TRUE	reported	igd	2	TRUE	0.000740508	57.131
rs13240464	C	T	C	T	-0.080704	0.398986	0.379	0.593192	FALSE	FALSE	FALSE	ieu-a-1057	7	110904226	0.246	899	0.1054	Gallbladder cancer || id:ieu-a-1057	Gallbladder cancer	Gallbladder cancer || ||	TRUE	igd	7	110898915	0.0116	3.12e-12	77096	ieu-b-42	schizophrenia || id:ieu-b-42	TRUE	reported	igd	2	TRUE	0.000627436	48.402
rs13261481	G	T	G	T	-0.062402	-0.0962189	0.591	0.558176	FALSE	FALSE	FALSE	ieu-a-1057	8	60713412	0.23	899	0.673899	Gallbladder cancer || id:ieu-a-1057	Gallbladder cancer	Gallbladder cancer || ||	TRUE	igd	8	60701801	0.011	1.66e-08	77096	ieu-b-42	schizophrenia || id:ieu-b-42	TRUE	reported	igd	2	TRUE	0.000417252	32.1811
rs1615350	T	C	T	C	-0.0851	0.139262	0.734	0.780456	FALSE	FALSE	FALSE	ieu-a-1057	12	123719444	0.28	899	0.6194	Gallbladder cancer || id:ieu-a-1057	Gallbladder cancer	Gallbladder cancer || ||	TRUE	igd	12	123650335	0.0123	4.26e-12	77096	ieu-b-42	schizophrenia || id:ieu-b-42	TRUE	reported	igd	2	TRUE	0.000620508	47.8672
rs1702294	C	T	C	T	0.118401	-0.774266	0.784	0.978632	FALSE	FALSE	FALSE	ieu-a-1057	1	98528211	0.571	899	0.1751	Gallbladder cancer || id:ieu-a-1057	Gallbladder cancer	Gallbladder cancer || ||	TRUE	igd	1	98501984	0.0138	1.03e-17	77096	ieu-b-42	schizophrenia || id:ieu-b-42	TRUE	reported	igd	2	TRUE	0.000953907	73.6108
rs17194490	T	G	T	G	0.0966	0.198031	0.165	0.02	FALSE	FALSE	FALSE	ieu-a-1057	3	2547786	0.763	899	0.795	Gallbladder cancer || id:ieu-a-1057	Gallbladder cancer	Gallbladder cancer || ||	TRUE	igd	3	2547786	0.0148	6.38e-11	77096	ieu-b-42	schizophrenia || id:ieu-b-42	TRUE	reported	igd	2	TRUE	0.00055228	42.601
rs2053079	G	A	G	A	0.071797	0.510426	0.265	0.295017	FALSE	FALSE	FALSE	ieu-a-1057	19	30992639	0.237	899	0.0312903	Gallbladder cancer || id:ieu-a-1057	Gallbladder cancer	Gallbladder cancer || ||	TRUE	igd	19	30987423	0.0127	1.74e-08	77096	ieu-b-42	schizophrenia || id:ieu-b-42	TRUE	reported	igd	2	TRUE	0.000414375	31.9591
rs2103655	A	G	A	G	0.0766	-0.363253	0.664	0.65772	FALSE	FALSE	FALSE	ieu-a-1057	20	37453194	0.253	899	0.1506	Gallbladder cancer || id:ieu-a-1057	Gallbladder cancer	Gallbladder cancer || ||	TRUE	igd	20	37425958	0.0119	1.24e-10	77096	ieu-b-42	schizophrenia || id:ieu-b-42	TRUE	reported	igd	2	TRUE	0.000537154	41.4336
rs215411	A	T	A	T	0.0692	-0.169603	0.327	0.178632	FALSE	TRUE	FALSE	ieu-a-1057	4	23424060	0.327	899	0.6041	Gallbladder cancer || id:ieu-a-1057	Gallbladder cancer	Gallbladder cancer || ||	TRUE	igd	4	23423603	0.0115	1.68e-09	77096	ieu-b-42	schizophrenia || id:ieu-b-42	TRUE	reported	igd	2	TRUE	0.000469441	36.2081
rs2414718	A	G	A	G	0.069797	0.470004	0.617	0.624561	FALSE	FALSE	FALSE	ieu-a-1057	15	61863133	0.251	899	0.0608597	Gallbladder cancer || id:ieu-a-1057	Gallbladder cancer	Gallbladder cancer || ||	TRUE	igd	15	61863133	0.011	1.98e-10	77096	ieu-b-42	schizophrenia || id:ieu-b-42	TRUE	reported	igd	2	TRUE	0.000521951	40.2603
rs2535627	C	T	C	T	-0.070403	0.154317	0.503	0.543192	FALSE	FALSE	FALSE	ieu-a-1057	3	52845105	0.237	899	0.513499	Gallbladder cancer || id:ieu-a-1057	Gallbladder cancer	Gallbladder cancer || ||	TRUE	igd	3	52845105	0.0109	1.17e-10	77096	ieu-b-42	schizophrenia || id:ieu-b-42	TRUE	reported	igd	2	TRUE	0.000540832	41.7175
rs2693698	G	A	G	A	0.061705	-0.27079	0.551	0.949544	FALSE	FALSE	FALSE	ieu-a-1057	14	99719219	0.508	899	0.5933	Gallbladder cancer || id:ieu-a-1057	Gallbladder cancer	Gallbladder cancer || ||	TRUE	igd	14	99719219	0.0111	2.99e-08	77096	ieu-b-42	schizophrenia || id:ieu-b-42	TRUE	reported	igd	2	TRUE	0.000400672	30.9018
rs28681284	T	C	T	C	-0.101601	0.0725707	0.214	0.530912	FALSE	FALSE	FALSE	ieu-a-1057	15	78915245	0.227	899	0.747901	Gallbladder cancer || id:ieu-a-1057	Gallbladder cancer	Gallbladder cancer || ||	TRUE	igd	15	78908565	0.0141	6.35e-13	77096	ieu-b-42	schizophrenia || id:ieu-b-42	TRUE	reported	igd	2	TRUE	0.000673029	51.9214
rs2905432	A	G	A	G	-0.066001	0.126698	0.671	0.710456	FALSE	FALSE	FALSE	ieu-a-1057	19	19619542	0.263	899	0.6292	Gallbladder cancer || id:ieu-a-1057	Gallbladder cancer	Gallbladder cancer || ||	TRUE	igd	19	19484295	0.0114	7.51e-09	77096	ieu-b-42	schizophrenia || id:ieu-b-42	TRUE	reported	igd	2	TRUE	0.000434581	33.5182
rs301797	A	C	A	C	0.066097	-0.590591	0.322	0.11772	FALSE	FALSE	FALSE	ieu-a-1057	1	8488565	0.439	899	0.1785	Gallbladder cancer || id:ieu-a-1057	Gallbladder cancer	Gallbladder cancer || ||	TRUE	igd	1	8487323	0.0116	1.2e-08	77096	ieu-b-42	schizophrenia || id:ieu-b-42	TRUE	reported	igd	2	TRUE	0.000420952	32.4666
rs34796896	A	G	A	G	-0.082198	-0.0449974	0.194	0.0695439	FALSE	FALSE	FALSE	ieu-a-1057	3	180647410	0.482	899	0.9256	Gallbladder cancer || id:ieu-a-1057	Gallbladder cancer	Gallbladder cancer || ||	TRUE	igd	3	180623255	0.0135	1.23e-09	77096	ieu-b-42	schizophrenia || id:ieu-b-42	TRUE	reported	igd	2	TRUE	0.000480634	37.0718
rs35324223	G	A	G	A	0.091995	0.803346	0.181	0.0413682	FALSE	FALSE	FALSE	ieu-a-1057	11	46513249	0.465	899	0.0842908	Gallbladder cancer || id:ieu-a-1057	Gallbladder cancer	Gallbladder cancer || ||	TRUE	igd	11	46402852	0.0145	2.04e-10	77096	ieu-b-42	schizophrenia || id:ieu-b-42	TRUE	reported	igd	2	TRUE	0.000521836	40.2514
rs35998080	T	G	T	G	0.069004	0.202124	0.45	0.12228	FALSE	FALSE	FALSE	ieu-a-1057	1	73286806	0.306	899	0.5077	Gallbladder cancer || id:ieu-a-1057	Gallbladder cancer	Gallbladder cancer || ||	TRUE	igd	1	73278615	0.0112	6.95e-10	77096	ieu-b-42	schizophrenia || id:ieu-b-42	TRUE	reported	igd	2	TRUE	0.000492115	37.9578
rs36068923	G	A	G	A	0.083501	0.0256677	0.187	0.169544	FALSE	FALSE	FALSE	ieu-a-1057	8	111547789	0.318	899	0.9362	Gallbladder cancer || id:ieu-a-1057	Gallbladder cancer	Gallbladder cancer || ||	TRUE	igd	8	111485761	0.0134	4.14e-10	77096	ieu-b-42	schizophrenia || id:ieu-b-42	TRUE	reported	igd	2	TRUE	0.000503412	38.8296
rs3798869	A	G	A	G	-0.066802	-0.134675	0.464	0.399088	FALSE	FALSE	FALSE	ieu-a-1057	6	84354101	0.242	899	0.5797	Gallbladder cancer || id:ieu-a-1057	Gallbladder cancer	Gallbladder cancer || ||	TRUE	igd	6	84328660	0.011	1.09e-09	77096	ieu-b-42	schizophrenia || id:ieu-b-42	TRUE	reported	igd	2	TRUE	0.000478139	36.8793
rs3849046	T	C	T	C	0.062496	-0.289016	0.508	0.158632	FALSE	FALSE	FALSE	ieu-a-1057	5	137851192	0.339	899	0.3933	Gallbladder cancer || id:ieu-a-1057	Gallbladder cancer	Gallbladder cancer || ||	TRUE	igd	5	137851192	0.0109	1.04e-08	77096	ieu-b-42	schizophrenia || id:ieu-b-42	TRUE	reported	igd	2	TRUE	0.000426221	32.8731
rs4129585	C	A	C	A	-0.079301	0.0171462	0.558	0.809555	FALSE	FALSE	FALSE	ieu-a-1057	8	143312933	0.286	898	0.9522	Gallbladder cancer || id:ieu-a-1057	Gallbladder cancer	Gallbladder cancer || ||	TRUE	igd	8	143312933	0.0109	3.61e-13	77096	ieu-b-42	schizophrenia || id:ieu-b-42	TRUE	reported	igd	2	TRUE	0.000686079	52.9289
rs4391122	G	A	G	A	0.078005	0.00995033	0.462	0.140456	FALSE	FALSE	FALSE	ieu-a-1057	5	60642595	0.336	899	0.9754	Gallbladder cancer || id:ieu-a-1057	Gallbladder cancer	Gallbladder cancer || ||	TRUE	igd	5	60598543	0.0109	8.9e-13	77096	ieu-b-42	schizophrenia || id:ieu-b-42	TRUE	reported	igd	2	TRUE	0.000663853	51.213
rs4648845	T	C	T	C	0.067201	-0.293416	0.479	0.878176	FALSE	FALSE	FALSE	ieu-a-1057	1	2390588	0.33	899	0.3736	Gallbladder cancer || id:ieu-a-1057	Gallbladder cancer	Gallbladder cancer || ||	TRUE	igd	1	2387101	0.0119	1.74e-08	77096	ieu-b-42	schizophrenia || id:ieu-b-42	TRUE	reported	igd	2	TRUE	0.000413472	31.8894
rs4702	A	G	A	G	-0.080505	0.0563803	0.574	0.499544	FALSE	FALSE	FALSE	ieu-a-1057	15	91426560	0.236	899	0.8108	Gallbladder cancer || id:ieu-a-1057	Gallbladder cancer	Gallbladder cancer || ||	TRUE	igd	15	91426560	0.0115	2.62e-12	77096	ieu-b-42	schizophrenia || id:ieu-b-42	TRUE	reported	igd	2	TRUE	0.000635246	49.0048
rs55775495	T	C	T	C	-0.068996	-0.172271	0.701	0.52772	FALSE	FALSE	FALSE	ieu-a-1057	2	198478320	0.233	899	0.4593	Gallbladder cancer || id:ieu-a-1057	Gallbladder cancer	Gallbladder cancer || ||	TRUE	igd	2	198245965	0.0114	1.56e-09	77096	ieu-b-42	schizophrenia || id:ieu-b-42	TRUE	reported	igd	2	TRUE	0.000474898	36.6292
rs6439649	T	G	T	G	0.070999	-0.240798	0.562	0.188632	FALSE	FALSE	FALSE	ieu-a-1057	3	136489563	0.318	899	0.4492	Gallbladder cancer || id:ieu-a-1057	Gallbladder cancer	Gallbladder cancer || ||	TRUE	igd	3	136371691	0.0111	1.37e-10	77096	ieu-b-42	schizophrenia || id:ieu-b-42	TRUE	reported	igd	2	TRUE	0.000530391	40.9117
rs6704768	A	G	A	G	-0.0766	-0.0171462	0.529	0.409544	FALSE	FALSE	FALSE	ieu-a-1057	2	233597196	0.236	899	0.9414	Gallbladder cancer || id:ieu-a-1057	Gallbladder cancer	Gallbladder cancer || ||	TRUE	igd	2	233592501	0.0109	2.06e-12	77096	ieu-b-42	schizophrenia || id:ieu-b-42	TRUE	reported	igd	2	TRUE	0.000640169	49.3848
rs75968099	T	C	T	C	0.080104	-0.142716	0.351	0.129544	FALSE	FALSE	FALSE	ieu-a-1057	3	36878970	0.355	899	0.686501	Gallbladder cancer || id:ieu-a-1057	Gallbladder cancer	Gallbladder cancer || ||	TRUE	igd	3	36858583	0.0114	2.31e-12	77096	ieu-b-42	schizophrenia || id:ieu-b-42	TRUE	reported	igd	2	TRUE	0.000640013	49.3728
rs7601312	G	A	G	A	0.058997	-0.517515	0.484	0.375439	FALSE	FALSE	FALSE	ieu-a-1057	2	229324680	0.257	899	0.0438299	Gallbladder cancer || id:ieu-a-1057	Gallbladder cancer	Gallbladder cancer || ||	TRUE	igd	2	229320093	0.0108	4.67e-08	77096	ieu-b-42	schizophrenia || id:ieu-b-42	TRUE	reported	igd	2	TRUE	0.000386912	29.8402
rs7819570	T	G	T	G	0.076498	-0.234457	0.207	0.0795439	FALSE	FALSE	FALSE	ieu-a-1057	8	89615855	0.433	899	0.588	Gallbladder cancer || id:ieu-a-1057	Gallbladder cancer	Gallbladder cancer || ||	TRUE	igd	8	89588626	0.014	4.47e-08	77096	ieu-b-42	schizophrenia || id:ieu-b-42	TRUE	reported	igd	2	TRUE	0.000387119	29.8561
rs783540	G	A	G	A	0.059899	-0.149282	0.43	0.507717	FALSE	FALSE	FALSE	ieu-a-1057	15	83254708	0.231	898	0.517101	Gallbladder cancer || id:ieu-a-1057	Gallbladder cancer	Gallbladder cancer || ||	TRUE	igd	15	83254708	0.011	4.77e-08	77096	ieu-b-42	schizophrenia || id:ieu-b-42	TRUE	reported	igd	2	TRUE	0.000384463	29.6512
rs7893279	G	T	G	T	-0.1124	0.276115	0.125	0.100912	FALSE	FALSE	FALSE	ieu-a-1057	10	18745105	0.371	899	0.4569	Gallbladder cancer || id:ieu-a-1057	Gallbladder cancer	Gallbladder cancer || ||	TRUE	igd	10	18745105	0.0175	1.24e-10	77096	ieu-b-42	schizophrenia || id:ieu-b-42	TRUE	reported	igd	2	TRUE	0.000534801	41.252
rs10108725	T	C	T	C	0.073204	0.169247	0.222	0.749	FALSE	FALSE	FALSE	ieu-a-1013	8	4191202	0.0538638	6794	0.00165211	Glioma || id:ieu-a-1013	Glioma	Glioma || ||	TRUE	igd	8	4191202	0.0133	3.32e-08	77096	ieu-b-42	schizophrenia || id:ieu-b-42	TRUE	reported	igd	2	TRUE	0.000392793	30.2939
rs1024582	G	A	G	A	-0.098904	-0.0131866	0.66	0.357	FALSE	FALSE	FALSE	ieu-a-1013	12	2408194	0.0458452	6808	0.773469	Glioma || id:ieu-a-1013	Glioma	Glioma || ||	TRUE	igd	12	2402246	0.0115	6.27e-18	77096	ieu-b-42	schizophrenia || id:ieu-b-42	TRUE	reported	igd	2	TRUE	0.000958481	73.9641
rs10791097	G	T	G	T	-0.0766	0.02137	0.52	0.457	FALSE	FALSE	FALSE	ieu-a-1013	11	130718711	0.043994	6809	0.627053	Glioma || id:ieu-a-1013	Glioma	Glioma || ||	TRUE	igd	11	130718630	0.0109	2.05e-12	77096	ieu-b-42	schizophrenia || id:ieu-b-42	TRUE	reported	igd	2	TRUE	0.000640169	49.3848
rs1106568	A	G	A	G	-0.069404	0.0320799	0.744	0.26	FALSE	FALSE	FALSE	ieu-a-1013	4	176861301	0.0501685	6806	0.522754	Glioma || id:ieu-a-1013	Glioma	Glioma || ||	TRUE	igd	4	176861301	0.0125	2.85e-08	77096	ieu-b-42	schizophrenia || id:ieu-b-42	TRUE	reported	igd	2	TRUE	0.000399709	30.8275
rs11191419	A	T	A	T	-0.101601	0.00757127	0.334	0.341	FALSE	TRUE	FALSE	ieu-a-1013	10	104618695	0.045942	6805	0.869394	Glioma || id:ieu-a-1013	Glioma	Glioma || ||	TRUE	igd	10	104612335	0.0118	6.69e-18	77096	ieu-b-42	schizophrenia || id:ieu-b-42	TRUE	reported	igd	2	TRUE	0.000960689	74.1346
rs11210892	A	G	A	G	-0.067797	0.0156765	0.652	0.323	FALSE	FALSE	FALSE	ieu-a-1013	1	44100084	0.0462951	6806	0.734328	Glioma || id:ieu-a-1013	Glioma	Glioma || ||	TRUE	igd	1	44100084	0.0115	3.42e-09	77096	ieu-b-42	schizophrenia || id:ieu-b-42	TRUE	reported	igd	2	TRUE	0.000450607	34.7547
rs11658257	C	G	C	G	-0.066204	0.0491902	0.573	0.677	FALSE	TRUE	TRUE	ieu-a-1013	17	18029857	0.0473619	6802	0.29872	Glioma || id:ieu-a-1013	Glioma	Glioma || ||	TRUE	igd	17	17956459	0.0115	8.34e-09	77096	ieu-b-42	schizophrenia || id:ieu-b-42	TRUE	reported	igd	2	FALSE	0.000429689	33.1407
rs11682175	C	T	C	T	0.073496	-0.0398936	0.439	0.553	FALSE	FALSE	FALSE	ieu-a-1013	2	57987593	0.0440446	6794	0.36532	Glioma || id:ieu-a-1013	Glioma	Glioma || ||	TRUE	igd	2	57987593	0.0109	1.58e-11	77096	ieu-b-42	schizophrenia || id:ieu-b-42	TRUE	reported	igd	2	TRUE	0.000589368	45.4635
rs12062861	A	G	A	G	-0.091096	0.12262	0.175	0.839	FALSE	FALSE	FALSE	ieu-a-1013	1	150106226	0.0590136	6778	0.0377146	Glioma || id:ieu-a-1013	Glioma	Glioma || ||	TRUE	igd	1	150017281	0.0149	9.66e-10	77096	ieu-b-42	schizophrenia || id:ieu-b-42	TRUE	reported	igd	2	TRUE	0.0004846	37.3779
rs12887734	T	G	T	G	0.088304	0.0261387	0.273	0.668	FALSE	FALSE	FALSE	ieu-a-1013	14	104092789	0.0480596	6671	0.586293	Glioma || id:ieu-a-1013	Glioma	Glioma || ||	TRUE	igd	14	104046834	0.0121	3.72e-13	77096	ieu-b-42	schizophrenia || id:ieu-b-42	TRUE	reported	igd	2	TRUE	0.000690332	53.2573
rs13240464	C	T	C	T	-0.080704	-0.028879	0.379	0.667	FALSE	FALSE	FALSE	ieu-a-1013	7	111078912	0.0467278	6806	0.53701	Glioma || id:ieu-a-1013	Glioma	Glioma || ||	TRUE	igd	7	110898915	0.0116	3.12e-12	77096	ieu-b-42	schizophrenia || id:ieu-b-42	TRUE	reported	igd	2	TRUE	0.000627436	48.402
rs1615350	T	C	T	C	-0.0851	0.0443996	0.734	0.24	FALSE	FALSE	FALSE	ieu-a-1013	12	123719444	0.0511351	6800	0.385009	Glioma || id:ieu-a-1013	Glioma	Glioma || ||	TRUE	igd	12	123650335	0.0123	4.26e-12	77096	ieu-b-42	schizophrenia || id:ieu-b-42	TRUE	reported	igd	2	TRUE	0.000620508	47.8672
rs1702294	C	T	C	T	0.118401	-0.00793137	0.784	0.223	FALSE	FALSE	FALSE	ieu-a-1013	1	98502934	0.0592127	6085	0.893384	Glioma || id:ieu-a-1013	Glioma	Glioma || ||	TRUE	igd	1	98501984	0.0138	1.03e-17	77096	ieu-b-42	schizophrenia || id:ieu-b-42	TRUE	reported	igd	2	TRUE	0.000953907	73.6108
rs17194490	T	G	T	G	0.0966	-0.086728	0.165	0.845	FALSE	FALSE	FALSE	ieu-a-1013	3	2547786	0.0593513	6799	0.143802	Glioma || id:ieu-a-1013	Glioma	Glioma || ||	TRUE	igd	3	2547786	0.0148	6.38e-11	77096	ieu-b-42	schizophrenia || id:ieu-b-42	TRUE	reported	igd	2	TRUE	0.00055228	42.601
rs2053079	G	A	G	A	0.071797	0.0244976	0.265	0.717	FALSE	FALSE	FALSE	ieu-a-1013	19	30992639	0.0487586	6810	0.615459	Glioma || id:ieu-a-1013	Glioma	Glioma || ||	TRUE	igd	19	30987423	0.0127	1.74e-08	77096	ieu-b-42	schizophrenia || id:ieu-b-42	TRUE	reported	igd	2	TRUE	0.000414375	31.9591
rs2103655	A	G	A	G	0.0766	-0.0184695	0.664	0.332	FALSE	FALSE	FALSE	ieu-a-1013	20	37453194	0.0469423	6806	0.694287	Glioma || id:ieu-a-1013	Glioma	Glioma || ||	TRUE	igd	20	37425958	0.0119	1.24e-10	77096	ieu-b-42	schizophrenia || id:ieu-b-42	TRUE	reported	igd	2	TRUE	0.000537154	41.4336
rs215411	A	T	A	T	0.0692	-0.00160128	0.327	0.353	FALSE	TRUE	FALSE	ieu-a-1013	4	23424060	0.0460068	6805	0.972322	Glioma || id:ieu-a-1013	Glioma	Glioma || ||	TRUE	igd	4	23423603	0.0115	1.68e-09	77096	ieu-b-42	schizophrenia || id:ieu-b-42	TRUE	reported	igd	2	TRUE	0.000469441	36.2081
rs2535627	C	T	C	T	-0.070403	0.0169427	0.503	0.51	FALSE	FALSE	FALSE	ieu-a-1013	3	52845105	0.0435879	6798	0.697219	Glioma || id:ieu-a-1013	Glioma	Glioma || ||	TRUE	igd	3	52845105	0.0109	1.17e-10	77096	ieu-b-42	schizophrenia || id:ieu-b-42	TRUE	reported	igd	2	TRUE	0.000540832	41.7175
rs2693698	G	A	G	A	0.061705	0.0118298	0.551	0.45	FALSE	FALSE	FALSE	ieu-a-1013	14	99719219	0.0439377	6809	0.787827	Glioma || id:ieu-a-1013	Glioma	Glioma || ||	TRUE	igd	14	99719219	0.0111	2.99e-08	77096	ieu-b-42	schizophrenia || id:ieu-b-42	TRUE	reported	igd	2	TRUE	0.000400672	30.9018
rs28681284	T	C	T	C	-0.101601	-0.00019998	0.214	0.771	FALSE	FALSE	FALSE	ieu-a-1013	15	78915245	0.0525501	6811	0.996646	Glioma || id:ieu-a-1013	Glioma	Glioma || ||	TRUE	igd	15	78908565	0.0141	6.35e-13	77096	ieu-b-42	schizophrenia || id:ieu-b-42	TRUE	reported	igd	2	TRUE	0.000673029	51.9214
rs2905432	A	G	A	G	-0.066001	0.016267	0.671	0.319	FALSE	FALSE	FALSE	ieu-a-1013	19	19562332	0.0456171	6810	0.720767	Glioma || id:ieu-a-1013	Glioma	Glioma || ||	TRUE	igd	19	19484295	0.0114	7.51e-09	77096	ieu-b-42	schizophrenia || id:ieu-b-42	TRUE	reported	igd	2	TRUE	0.000434581	33.5182
rs301797	A	C	A	C	0.066097	0.0230639	0.322	0.657	FALSE	FALSE	FALSE	ieu-a-1013	1	8488565	0.046115	6794	0.617402	Glioma || id:ieu-a-1013	Glioma	Glioma || ||	TRUE	igd	1	8487323	0.0116	1.2e-08	77096	ieu-b-42	schizophrenia || id:ieu-b-42	TRUE	reported	igd	2	TRUE	0.000420952	32.4666
rs34796896	A	G	A	G	-0.082198	0.0829469	0.194	0.808	FALSE	FALSE	FALSE	ieu-a-1013	3	180647410	0.0544701	6810	0.127628	Glioma || id:ieu-a-1013	Glioma	Glioma || ||	TRUE	igd	3	180623255	0.0135	1.23e-09	77096	ieu-b-42	schizophrenia || id:ieu-b-42	TRUE	reported	igd	2	TRUE	0.000480634	37.0718
rs35225200	C	A	C	A	0.144795	0.037079	0.087	0.949	FALSE	FALSE	FALSE	ieu-a-1013	4	103188709	0.0907164	6808	0.683078	Glioma || id:ieu-a-1013	Glioma	Glioma || ||	TRUE	igd	4	103146888	0.0203	9.56e-13	77096	ieu-b-42	schizophrenia || id:ieu-b-42	TRUE	reported	igd	2	TRUE	0.000659473	50.8749
rs35324223	G	A	G	A	0.091995	0.138343	0.181	0.842	FALSE	FALSE	FALSE	ieu-a-1013	11	46491159	0.0609992	6758	0.0231958	Glioma || id:ieu-a-1013	Glioma	Glioma || ||	TRUE	igd	11	46402852	0.0145	2.04e-10	77096	ieu-b-42	schizophrenia || id:ieu-b-42	TRUE	reported	igd	2	TRUE	0.000521836	40.2514
rs36068923	G	A	G	A	0.083501	0.0312843	0.187	0.803	FALSE	FALSE	FALSE	ieu-a-1013	8	111547789	0.0552999	6805	0.571319	Glioma || id:ieu-a-1013	Glioma	Glioma || ||	TRUE	igd	8	111485761	0.0134	4.14e-10	77096	ieu-b-42	schizophrenia || id:ieu-b-42	TRUE	reported	igd	2	TRUE	0.000503412	38.8296
rs3798869	A	G	A	G	-0.066802	0.00270365	0.464	0.552	FALSE	FALSE	FALSE	ieu-a-1013	6	84398565	0.0435078	6808	0.950558	Glioma || id:ieu-a-1013	Glioma	Glioma || ||	TRUE	igd	6	84328660	0.011	1.09e-09	77096	ieu-b-42	schizophrenia || id:ieu-b-42	TRUE	reported	igd	2	TRUE	0.000478139	36.8793
rs3849046	T	C	T	C	0.062496	0.0455468	0.508	0.43	FALSE	FALSE	FALSE	ieu-a-1013	5	137851192	0.0441567	6765	0.301773	Glioma || id:ieu-a-1013	Glioma	Glioma || ||	TRUE	igd	5	137851192	0.0109	1.04e-08	77096	ieu-b-42	schizophrenia || id:ieu-b-42	TRUE	reported	igd	2	TRUE	0.000426221	32.8731
rs4129585	C	A	C	A	-0.079301	0.0600598	0.558	0.43	FALSE	FALSE	FALSE	ieu-a-1013	8	143312933	0.0440061	6805	0.172602	Glioma || id:ieu-a-1013	Glioma	Glioma || ||	TRUE	igd	8	143312933	0.0109	3.61e-13	77096	ieu-b-42	schizophrenia || id:ieu-b-42	TRUE	reported	igd	2	TRUE	0.000686079	52.9289
rs4391122	G	A	G	A	0.078005	-0.0711106	0.462	0.521	FALSE	FALSE	FALSE	ieu-a-1013	5	60642595	0.0440206	6811	0.106266	Glioma || id:ieu-a-1013	Glioma	Glioma || ||	TRUE	igd	5	60598543	0.0109	8.9e-13	77096	ieu-b-42	schizophrenia || id:ieu-b-42	TRUE	reported	igd	2	TRUE	0.000663853	51.213
rs4648845	T	C	T	C	0.067201	-0.0476159	0.479	0.474	FALSE	FALSE	FALSE	ieu-a-1013	1	2390588	0.0432915	6762	0.270843	Glioma || id:ieu-a-1013	Glioma	Glioma || ||	TRUE	igd	1	2387101	0.0119	1.74e-08	77096	ieu-b-42	schizophrenia || id:ieu-b-42	TRUE	reported	igd	2	TRUE	0.000413472	31.8894
rs4702	A	G	A	G	-0.080505	-0.016231	0.574	0.45	FALSE	FALSE	FALSE	ieu-a-1013	15	91426560	0.0438408	6807	0.711536	Glioma || id:ieu-a-1013	Glioma	Glioma || ||	TRUE	igd	15	91426560	0.0115	2.62e-12	77096	ieu-b-42	schizophrenia || id:ieu-b-42	TRUE	reported	igd	2	TRUE	0.000635246	49.0048
rs55775495	T	C	T	C	-0.068996	0.0390284	0.701	0.355	FALSE	FALSE	FALSE	ieu-a-1013	2	198478320	0.0466942	6811	0.403067	Glioma || id:ieu-a-1013	Glioma	Glioma || ||	TRUE	igd	2	198245965	0.0114	1.56e-09	77096	ieu-b-42	schizophrenia || id:ieu-b-42	TRUE	reported	igd	2	TRUE	0.000474898	36.6292
rs6439649	T	G	T	G	0.070999	-0.0393647	0.562	0.419	FALSE	FALSE	FALSE	ieu-a-1013	3	136489563	0.0446261	6807	0.378215	Glioma || id:ieu-a-1013	Glioma	Glioma || ||	TRUE	igd	3	136371691	0.0111	1.37e-10	77096	ieu-b-42	schizophrenia || id:ieu-b-42	TRUE	reported	igd	2	TRUE	0.000530391	40.9117
rs6704768	A	G	A	G	-0.0766	0.0348844	0.529	0.47	FALSE	FALSE	FALSE	ieu-a-1013	2	233597196	0.0441898	6805	0.429839	Glioma || id:ieu-a-1013	Glioma	Glioma || ||	TRUE	igd	2	233592501	0.0109	2.06e-12	77096	ieu-b-42	schizophrenia || id:ieu-b-42	TRUE	reported	igd	2	TRUE	0.000640169	49.3848
rs73036062	A	G	A	G	-0.089104	0.020611	0.21	0.751	FALSE	FALSE	FALSE	ieu-a-1013	11	133840412	0.052173	6806	0.693493	Glioma || id:ieu-a-1013	Glioma	Glioma || ||	TRUE	igd	11	133828187	0.0135	3.68e-11	77096	ieu-b-42	schizophrenia || id:ieu-b-42	TRUE	reported	igd	2	TRUE	0.000564741	43.5628
rs75968099	T	C	T	C	0.080104	0.0564645	0.351	0.638	FALSE	FALSE	FALSE	ieu-a-1013	3	36862980	0.0528382	4950	0.285125	Glioma || id:ieu-a-1013	Glioma	Glioma || ||	TRUE	igd	3	36858583	0.0114	2.31e-12	77096	ieu-b-42	schizophrenia || id:ieu-b-42	TRUE	reported	igd	2	TRUE	0.000640013	49.3728
rs783540	G	A	G	A	0.059899	0.0100503	0.43	0.605	FALSE	FALSE	FALSE	ieu-a-1013	15	83254708	0.0447557	6768	0.821787	Glioma || id:ieu-a-1013	Glioma	Glioma || ||	TRUE	igd	15	83254708	0.011	4.77e-08	77096	ieu-b-42	schizophrenia || id:ieu-b-42	TRUE	reported	igd	2	TRUE	0.000384463	29.6512
rs7893279	G	T	G	T	-0.1124	0.148964	0.125	0.878	FALSE	FALSE	FALSE	ieu-a-1013	10	18745105	0.0697472	6811	0.0325627	Glioma || id:ieu-a-1013	Glioma	Glioma || ||	TRUE	igd	10	18745105	0.0175	1.24e-10	77096	ieu-b-42	schizophrenia || id:ieu-b-42	TRUE	reported	igd	2	TRUE	0.000534801	41.252
rs10108725	T	C	T	C	0.073204	-0.0298635	0.222	0.214573	FALSE	FALSE	FALSE	ieu-a-966	8	4191202	0.021071	27209	0.178249	Lung cancer || id:ieu-a-966	Lung cancer	Lung cancer || ||	TRUE	igd	8	4191202	0.0133	3.32e-08	77096	ieu-b-42	schizophrenia || id:ieu-b-42	TRUE	reported	igd	2	TRUE	0.000392793	30.2939
rs1024582	G	A	G	A	-0.098904	-0.0107678	0.66	0.658091	FALSE	FALSE	FALSE	ieu-a-966	12	2402246	0.019044	27209	0.574876	Lung cancer || id:ieu-a-966	Lung cancer	Lung cancer || ||	TRUE	igd	12	2402246	0.0115	6.27e-18	77096	ieu-b-42	schizophrenia || id:ieu-b-42	TRUE	reported	igd	2	TRUE	0.000958481	73.9641
rs10791097	G	T	G	T	-0.0766	-0.0118456	0.52	0.536924	FALSE	FALSE	FALSE	ieu-a-966	11	130718630	0.018055	27209	0.514296	Lung cancer || id:ieu-a-966	Lung cancer	Lung cancer || ||	TRUE	igd	11	130718630	0.0109	2.05e-12	77096	ieu-b-42	schizophrenia || id:ieu-b-42	TRUE	reported	igd	2	TRUE	0.000640169	49.3848
rs11027857	A	G	A	G	0.063998	-0.00244601	0.587	0.5118	FALSE	FALSE	FALSE	ieu-a-966	11	24403620	0.017786	27209	0.892233	Lung cancer || id:ieu-a-966	Lung cancer	Lung cancer || ||	TRUE	igd	11	24403620	0.0109	3.67e-09	77096	ieu-b-42	schizophrenia || id:ieu-b-42	TRUE	reported	igd	2	TRUE	0.000446945	34.4722
rs1106568	A	G	A	G	-0.069404	0.0183982	0.744	0.761574	FALSE	FALSE	FALSE	ieu-a-966	4	176861301	0.020337	27209	0.384279	Lung cancer || id:ieu-a-966	Lung cancer	Lung cancer || ||	TRUE	igd	4	176861301	0.0125	2.85e-08	77096	ieu-b-42	schizophrenia || id:ieu-b-42	TRUE	reported	igd	2	TRUE	0.000399709	30.8275
rs111294930	G	A	G	A	-0.087699	-0.0046508	0.219	0.219328	FALSE	FALSE	FALSE	ieu-a-966	5	152177121	0.023772	27209	0.849184	Lung cancer || id:ieu-a-966	Lung cancer	Lung cancer || ||	TRUE	igd	5	152177121	0.0143	9.29e-10	77096	ieu-b-42	schizophrenia || id:ieu-b-42	TRUE	reported	igd	2	TRUE	0.000487611	37.6102
rs11139497	A	T	A	T	0.0656	0.0283134	0.336	0.321269	FALSE	TRUE	FALSE	ieu-a-966	9	84739941	0.019899	27209	0.151035	Lung cancer || id:ieu-a-966	Lung cancer	Lung cancer || ||	TRUE	igd	9	84739941	0.0118	2.65e-08	77096	ieu-b-42	schizophrenia || id:ieu-b-42	TRUE	reported	igd	2	TRUE	0.000400717	30.9053
rs11191419	A	T	A	T	-0.101601	-0.00415361	0.334	0.347076	FALSE	TRUE	FALSE	ieu-a-966	10	104612335	0.01932	27209	0.833654	Lung cancer || id:ieu-a-966	Lung cancer	Lung cancer || ||	TRUE	igd	10	104612335	0.0118	6.69e-18	77096	ieu-b-42	schizophrenia || id:ieu-b-42	TRUE	reported	igd	2	TRUE	0.000960689	74.1346
rs11210892	A	G	A	G	-0.067797	-0.013753	0.652	0.676714	FALSE	FALSE	FALSE	ieu-a-966	1	44100084	0.019183	27209	0.475655	Lung cancer || id:ieu-a-966	Lung cancer	Lung cancer || ||	TRUE	igd	1	44100084	0.0115	3.42e-09	77096	ieu-b-42	schizophrenia || id:ieu-b-42	TRUE	reported	igd	2	TRUE	0.000450607	34.7547
rs11658257	C	G	C	G	-0.066204	-0.00460239	0.573	0.636693	FALSE	TRUE	TRUE	ieu-a-966	17	17958402	0.019349	27209	0.814655	Lung cancer || id:ieu-a-966	Lung cancer	Lung cancer || ||	TRUE	igd	17	17956459	0.0115	8.34e-09	77096	ieu-b-42	schizophrenia || id:ieu-b-42	TRUE	reported	igd	2	FALSE	0.000429689	33.1407
rs11682175	C	T	C	T	0.073496	-0.0133274	0.439	0.4663	FALSE	FALSE	FALSE	ieu-a-966	2	57987593	0.017573	27209	0.462204	Lung cancer || id:ieu-a-966	Lung cancer	Lung cancer || ||	TRUE	igd	2	57987593	0.0109	1.58e-11	77096	ieu-b-42	schizophrenia || id:ieu-b-42	TRUE	reported	igd	2	TRUE	0.000589368	45.4635
rs11693094	T	C	T	C	-0.073603	0.00384759	0.429	0.444594	FALSE	FALSE	FALSE	ieu-a-966	2	185601420	0.018044	27209	0.833444	Lung cancer || id:ieu-a-966	Lung cancer	Lung cancer || ||	TRUE	igd	2	185601420	0.011	2.17e-11	77096	ieu-b-42	schizophrenia || id:ieu-b-42	TRUE	reported	igd	2	TRUE	0.000580392	44.7708
rs11693528	G	C	G	C	0.102797	0.0346613	0.185	0.197195	FALSE	TRUE	FALSE	ieu-a-966	2	200736507	0.02313	27209	0.129206	Lung cancer || id:ieu-a-966	Lung cancer	Lung cancer || ||	TRUE	igd	2	200736507	0.0136	4.73e-14	77096	ieu-b-42	schizophrenia || id:ieu-b-42	TRUE	reported	igd	2	TRUE	0.000740508	57.131
rs117074560	T	C	T	C	-0.156595	-0.00823078	0.037	0.0492236	FALSE	FALSE	FALSE	ieu-a-966	6	96459651	0.043567	27209	0.85777	Lung cancer || id:ieu-a-966	Lung cancer	Lung cancer || ||	TRUE	igd	6	96459651	0.0277	1.66e-08	77096	ieu-b-42	schizophrenia || id:ieu-b-42	TRUE	reported	igd	2	TRUE	0.000414366	31.9584
rs11740474	T	A	T	A	0.062695	-0.00479347	0.412	0.354587	FALSE	TRUE	FALSE	ieu-a-966	5	153685149	0.018418	27209	0.799252	Lung cancer || id:ieu-a-966	Lung cancer	Lung cancer || ||	TRUE	igd	5	153680747	0.0112	2e-08	77096	ieu-b-42	schizophrenia || id:ieu-b-42	TRUE	reported	igd	2	TRUE	0.000406276	31.3342
rs1191551	G	T	G	T	-0.071697	-0.00157975	0.784	0.769106	FALSE	FALSE	FALSE	ieu-a-966	14	30000405	0.021445	27209	0.942391	Lung cancer || id:ieu-a-966	Lung cancer	Lung cancer || ||	TRUE	igd	14	30000405	0.0131	4.21e-08	77096	ieu-b-42	schizophrenia || id:ieu-b-42	TRUE	reported	igd	2	TRUE	0.000388382	29.9535
rs12062861	A	G	A	G	-0.091096	0.029115	0.175	0.16179	FALSE	FALSE	FALSE	ieu-a-966	1	150017281	0.024812	27209	0.238242	Lung cancer || id:ieu-a-966	Lung cancer	Lung cancer || ||	TRUE	igd	1	150017281	0.0149	9.66e-10	77096	ieu-b-42	schizophrenia || id:ieu-b-42	TRUE	reported	igd	2	TRUE	0.0004846	37.3779
rs12691307	G	A	G	A	-0.071902	-0.0120837	0.478	0.48977	FALSE	FALSE	FALSE	ieu-a-966	16	29939877	0.018994	27209	0.52739	Lung cancer || id:ieu-a-966	Lung cancer	Lung cancer || ||	TRUE	igd	16	29939877	0.0113	2.03e-10	77096	ieu-b-42	schizophrenia || id:ieu-b-42	TRUE	reported	igd	2	TRUE	0.000524886	40.4868
rs12704290	A	G	A	G	-0.106105	-0.0326596	0.131	0.127783	FALSE	FALSE	FALSE	ieu-a-966	7	86427626	0.026084	27209	0.23815	Lung cancer || id:ieu-a-966	Lung cancer	Lung cancer || ||	TRUE	igd	7	86427626	0.0168	2.59e-10	77096	ieu-b-42	schizophrenia || id:ieu-b-42	TRUE	reported	igd	2	TRUE	0.000517126	39.888
rs12887734	T	G	T	G	0.088304	0.0310926	0.273	0.290472	FALSE	FALSE	FALSE	ieu-a-966	14	104046834	0.02071	27209	0.128997	Lung cancer || id:ieu-a-966	Lung cancer	Lung cancer || ||	TRUE	igd	14	104046834	0.0121	3.72e-13	77096	ieu-b-42	schizophrenia || id:ieu-b-42	TRUE	reported	igd	2	TRUE	0.000690332	53.2573
rs12932476	G	C	G	C	-0.059702	0.00943436	0.512	0.511662	FALSE	TRUE	TRUE	ieu-a-966	16	63712719	0.017973	27209	0.609618	Lung cancer || id:ieu-a-966	Lung cancer	Lung cancer || ||	TRUE	igd	16	63709630	0.0109	4.62e-08	77096	ieu-b-42	schizophrenia || id:ieu-b-42	TRUE	reported	igd	2	FALSE	0.000388977	29.9995
rs13240464	C	T	C	T	-0.080704	0.00242905	0.379	0.347023	FALSE	FALSE	FALSE	ieu-a-966	7	110898915	0.018766	27209	0.898651	Lung cancer || id:ieu-a-966	Lung cancer	Lung cancer || ||	TRUE	igd	7	110898915	0.0116	3.12e-12	77096	ieu-b-42	schizophrenia || id:ieu-b-42	TRUE	reported	igd	2	TRUE	0.000627436	48.402
rs13261481	G	T	G	T	-0.062402	0.0186111	0.591	0.594929	FALSE	FALSE	FALSE	ieu-a-966	8	60701801	0.017899	27209	0.316204	Lung cancer || id:ieu-a-966	Lung cancer	Lung cancer || ||	TRUE	igd	8	60701801	0.011	1.66e-08	77096	ieu-b-42	schizophrenia || id:ieu-b-42	TRUE	reported	igd	2	TRUE	0.000417252	32.1811
rs1339227	T	C	T	C	-0.063302	-0.0194744	0.355	0.353003	FALSE	FALSE	FALSE	ieu-a-966	6	73155701	0.018349	27209	0.306931	Lung cancer || id:ieu-a-966	Lung cancer	Lung cancer || ||	TRUE	igd	6	73155701	0.0114	3.06e-08	77096	ieu-b-42	schizophrenia || id:ieu-b-42	TRUE	reported	igd	2	TRUE	0.000399779	30.8329
rs1498232	C	T	C	T	-0.072004	0.00427513	0.697	0.705404	FALSE	FALSE	FALSE	ieu-a-966	1	30433951	0.019365	27209	0.829279	Lung cancer || id:ieu-a-966	Lung cancer	Lung cancer || ||	TRUE	igd	1	30433951	0.0118	1.21e-09	77096	ieu-b-42	schizophrenia || id:ieu-b-42	TRUE	reported	igd	2	TRUE	0.000482734	37.2339
rs1509378	G	A	G	A	-0.0692	-0.0103394	0.646	0.6545	FALSE	FALSE	FALSE	ieu-a-966	2	22754466	0.020655	27209	0.620207	Lung cancer || id:ieu-a-966	Lung cancer	Lung cancer || ||	TRUE	igd	2	22754466	0.0119	5.39e-09	77096	ieu-b-42	schizophrenia || id:ieu-b-42	TRUE	reported	igd	2	TRUE	0.000438426	33.8148
rs1615350	T	C	T	C	-0.0851	-0.000355937	0.734	0.74755	FALSE	FALSE	FALSE	ieu-a-966	12	123650335	0.020614	27209	0.986508	Lung cancer || id:ieu-a-966	Lung cancer	Lung cancer || ||	TRUE	igd	12	123650335	0.0123	4.26e-12	77096	ieu-b-42	schizophrenia || id:ieu-b-42	TRUE	reported	igd	2	TRUE	0.000620508	47.8672
rs16867576	G	A	G	A	-0.095801	-0.033014	0.12	0.121285	FALSE	FALSE	FALSE	ieu-a-966	5	88746331	0.026729	27209	0.245062	Lung cancer || id:ieu-a-966	Lung cancer	Lung cancer || ||	TRUE	igd	5	88746331	0.017	1.6e-08	77096	ieu-b-42	schizophrenia || id:ieu-b-42	TRUE	reported	igd	2	TRUE	0.000411748	31.7564
rs1702294	C	T	C	T	0.118401	0.0118034	0.784	0.792299	FALSE	FALSE	FALSE	ieu-a-966	1	98501984	0.021508	27209	0.595646	Lung cancer || id:ieu-a-966	Lung cancer	Lung cancer || ||	TRUE	igd	1	98501984	0.0138	1.03e-17	77096	ieu-b-42	schizophrenia || id:ieu-b-42	TRUE	reported	igd	2	TRUE	0.000953907	73.6108
rs17108967	C	T	C	T	0.065296	0.0230317	0.343	0.343762	FALSE	FALSE	FALSE	ieu-a-966	14	71542168	0.019251	27209	0.22952	Lung cancer || id:ieu-a-966	Lung cancer	Lung cancer || ||	TRUE	igd	14	71542168	0.0115	1.21e-08	77096	ieu-b-42	schizophrenia || id:ieu-b-42	TRUE	reported	igd	2	TRUE	0.000417988	32.2379
rs17194490	T	G	T	G	0.0966	-0.0211205	0.165	0.165312	FALSE	FALSE	FALSE	ieu-a-966	3	2547786	0.023516	27209	0.390628	Lung cancer || id:ieu-a-966	Lung cancer	Lung cancer || ||	TRUE	igd	3	2547786	0.0148	6.38e-11	77096	ieu-b-42	schizophrenia || id:ieu-b-42	TRUE	reported	igd	2	TRUE	0.00055228	42.601
rs2053079	G	A	G	A	0.071797	-0.0130903	0.265	0.228608	FALSE	FALSE	FALSE	ieu-a-966	19	30987423	0.020971	27209	0.546405	Lung cancer || id:ieu-a-966	Lung cancer	Lung cancer || ||	TRUE	igd	19	30987423	0.0127	1.74e-08	77096	ieu-b-42	schizophrenia || id:ieu-b-42	TRUE	reported	igd	2	TRUE	0.000414375	31.9591
rs2103655	A	G	A	G	0.0766	0.00370385	0.664	0.692543	FALSE	FALSE	FALSE	ieu-a-966	20	37425958	0.018884	27209	0.847914	Lung cancer || id:ieu-a-966	Lung cancer	Lung cancer || ||	TRUE	igd	20	37425958	0.0119	1.24e-10	77096	ieu-b-42	schizophrenia || id:ieu-b-42	TRUE	reported	igd	2	TRUE	0.000537154	41.4336
rs215411	A	T	A	T	0.0692	-0.0372513	0.327	0.340416	FALSE	TRUE	FALSE	ieu-a-966	4	23423603	0.01826	27209	0.0537774	Lung cancer || id:ieu-a-966	Lung cancer	Lung cancer || ||	TRUE	igd	4	23423603	0.0115	1.68e-09	77096	ieu-b-42	schizophrenia || id:ieu-b-42	TRUE	reported	igd	2	TRUE	0.000469441	36.2081
rs2332700	G	C	G	C	-0.0771	-0.0198418	0.756	0.749829	FALSE	TRUE	FALSE	ieu-a-966	14	72417326	0.020933	27209	0.343475	Lung cancer || id:ieu-a-966	Lung cancer	Lung cancer || ||	TRUE	igd	14	72417326	0.0125	7.38e-10	77096	ieu-b-42	schizophrenia || id:ieu-b-42	TRUE	reported	igd	2	TRUE	0.000493222	38.0432
rs2414718	A	G	A	G	0.069797	0.00617402	0.617	0.583369	FALSE	FALSE	FALSE	ieu-a-966	15	61863133	0.017876	27209	0.735992	Lung cancer || id:ieu-a-966	Lung cancer	Lung cancer || ||	TRUE	igd	15	61863133	0.011	1.98e-10	77096	ieu-b-42	schizophrenia || id:ieu-b-42	TRUE	reported	igd	2	TRUE	0.000521951	40.2603
rs2514218	T	C	T	C	-0.072205	-0.0136031	0.327	0.34329	FALSE	FALSE	FALSE	ieu-a-966	11	113392994	0.018866	27209	0.485272	Lung cancer || id:ieu-a-966	Lung cancer	Lung cancer || ||	TRUE	igd	11	113392994	0.0116	4.64e-10	77096	ieu-b-42	schizophrenia || id:ieu-b-42	TRUE	reported	igd	2	TRUE	0.000502306	38.7443
rs2535627	C	T	C	T	-0.070403	-0.00840321	0.503	0.478593	FALSE	FALSE	FALSE	ieu-a-966	3	52845105	0.017655	27209	0.642896	Lung cancer || id:ieu-a-966	Lung cancer	Lung cancer || ||	TRUE	igd	3	52845105	0.0109	1.17e-10	77096	ieu-b-42	schizophrenia || id:ieu-b-42	TRUE	reported	igd	2	TRUE	0.000540832	41.7175
rs2693698	G	A	G	A	0.061705	0.0460596	0.551	0.549223	FALSE	FALSE	FALSE	ieu-a-966	14	99719219	0.017094	27209	0.0114969	Lung cancer || id:ieu-a-966	Lung cancer	Lung cancer || ||	TRUE	igd	14	99719219	0.0111	2.99e-08	77096	ieu-b-42	schizophrenia || id:ieu-b-42	TRUE	reported	igd	2	TRUE	0.000400672	30.9018
rs28681284	T	C	T	C	-0.101601	-0.260559	0.214	0.192091	FALSE	FALSE	FALSE	ieu-a-966	15	78908565	0.017956	27209	9.44e-28	Lung cancer || id:ieu-a-966	Lung cancer	Lung cancer || ||	TRUE	igd	15	78908565	0.0141	6.35e-13	77096	ieu-b-42	schizophrenia || id:ieu-b-42	TRUE	reported	igd	2	TRUE	0.000673029	51.9214
rs2905432	A	G	A	G	-0.066001	-0.0302983	0.671	0.644466	FALSE	FALSE	FALSE	ieu-a-966	19	19484295	0.019934	27209	0.12433	Lung cancer || id:ieu-a-966	Lung cancer	Lung cancer || ||	TRUE	igd	19	19484295	0.0114	7.51e-09	77096	ieu-b-42	schizophrenia || id:ieu-b-42	TRUE	reported	igd	2	TRUE	0.000434581	33.5182
rs2909457	A	G	A	G	-0.059697	0.00254925	0.574	0.561395	FALSE	FALSE	FALSE	ieu-a-966	2	162845855	0.018003	27209	0.889638	Lung cancer || id:ieu-a-966	Lung cancer	Lung cancer || ||	TRUE	igd	2	162845855	0.0109	4.25e-08	77096	ieu-b-42	schizophrenia || id:ieu-b-42	TRUE	reported	igd	2	TRUE	0.000388912	29.9944
rs301797	A	C	A	C	0.066097	-0.00519949	0.322	0.312915	FALSE	FALSE	FALSE	ieu-a-966	1	8487323	0.01912	27209	0.7907	Lung cancer || id:ieu-a-966	Lung cancer	Lung cancer || ||	TRUE	igd	1	8487323	0.0116	1.2e-08	77096	ieu-b-42	schizophrenia || id:ieu-b-42	TRUE	reported	igd	2	TRUE	0.000420952	32.4666
rs34796896	A	G	A	G	-0.082198	-0.0222292	0.194	0.211588	FALSE	FALSE	FALSE	ieu-a-966	3	180623255	0.021459	27209	0.321577	Lung cancer || id:ieu-a-966	Lung cancer	Lung cancer || ||	TRUE	igd	3	180623255	0.0135	1.23e-09	77096	ieu-b-42	schizophrenia || id:ieu-b-42	TRUE	reported	igd	2	TRUE	0.000480634	37.0718
rs35225200	C	A	C	A	0.144795	0.0391774	0.087	0.0889353	FALSE	FALSE	FALSE	ieu-a-966	4	103146888	0.034513	27209	0.253561	Lung cancer || id:ieu-a-966	Lung cancer	Lung cancer || ||	TRUE	igd	4	103146888	0.0203	9.56e-13	77096	ieu-b-42	schizophrenia || id:ieu-b-42	TRUE	reported	igd	2	TRUE	0.000659473	50.8749
rs35324223	G	A	G	A	0.091995	0.0226867	0.181	0.171709	FALSE	FALSE	FALSE	ieu-a-966	11	46402852	0.024559	27209	0.356219	Lung cancer || id:ieu-a-966	Lung cancer	Lung cancer || ||	TRUE	igd	11	46402852	0.0145	2.04e-10	77096	ieu-b-42	schizophrenia || id:ieu-b-42	TRUE	reported	igd	2	TRUE	0.000521836	40.2514
rs35998080	T	G	T	G	0.069004	0.0124482	0.45	0.432367	FALSE	FALSE	FALSE	ieu-a-966	1	73278615	0.018722	27209	0.508644	Lung cancer || id:ieu-a-966	Lung cancer	Lung cancer || ||	TRUE	igd	1	73278615	0.0112	6.95e-10	77096	ieu-b-42	schizophrenia || id:ieu-b-42	TRUE	reported	igd	2	TRUE	0.000492115	37.9578
rs36068923	G	A	G	A	0.083501	-0.0366712	0.187	0.199891	FALSE	FALSE	FALSE	ieu-a-966	8	111485761	0.021491	27209	0.107678	Lung cancer || id:ieu-a-966	Lung cancer	Lung cancer || ||	TRUE	igd	8	111485761	0.0134	4.14e-10	77096	ieu-b-42	schizophrenia || id:ieu-b-42	TRUE	reported	igd	2	TRUE	0.000503412	38.8296
rs3798869	A	G	A	G	-0.066802	0.0199595	0.464	0.439245	FALSE	FALSE	FALSE	ieu-a-966	6	84328660	0.018279	27209	0.273819	Lung cancer || id:ieu-a-966	Lung cancer	Lung cancer || ||	TRUE	igd	6	84328660	0.011	1.09e-09	77096	ieu-b-42	schizophrenia || id:ieu-b-42	TRUE	reported	igd	2	TRUE	0.000478139	36.8793
rs3849046	T	C	T	C	0.062496	-0.0259426	0.508	0.55237	FALSE	FALSE	FALSE	ieu-a-966	5	137851192	0.018529	27209	0.158142	Lung cancer || id:ieu-a-966	Lung cancer	Lung cancer || ||	TRUE	igd	5	137851192	0.0109	1.04e-08	77096	ieu-b-42	schizophrenia || id:ieu-b-42	TRUE	reported	igd	2	TRUE	0.000426221	32.8731
rs4129585	C	A	C	A	-0.079301	-0.0250389	0.558	0.560657	FALSE	FALSE	FALSE	ieu-a-966	8	143312933	0.018388	27209	0.170205	Lung cancer || id:ieu-a-966	Lung cancer	Lung cancer || ||	TRUE	igd	8	143312933	0.0109	3.61e-13	77096	ieu-b-42	schizophrenia || id:ieu-b-42	TRUE	reported	igd	2	TRUE	0.000686079	52.9289
rs4391122	G	A	G	A	0.078005	-0.00820425	0.462	0.492149	FALSE	FALSE	FALSE	ieu-a-966	5	60598543	0.018627	27209	0.662863	Lung cancer || id:ieu-a-966	Lung cancer	Lung cancer || ||	TRUE	igd	5	60598543	0.0109	8.9e-13	77096	ieu-b-42	schizophrenia || id:ieu-b-42	TRUE	reported	igd	2	TRUE	0.000663853	51.213
rs4523957	T	G	T	G	0.069703	-0.00403684	0.603	0.628198	FALSE	FALSE	FALSE	ieu-a-966	17	2208899	0.018989	27209	0.834074	Lung cancer || id:ieu-a-966	Lung cancer	Lung cancer || ||	TRUE	igd	17	2208899	0.0115	1.4e-09	77096	ieu-b-42	schizophrenia || id:ieu-b-42	TRUE	reported	igd	2	TRUE	0.000476287	36.7363
rs4648845	T	C	T	C	0.067201	0.0138635	0.479	0.492801	FALSE	FALSE	FALSE	ieu-a-966	1	2387101	0.019289	27209	0.474581	Lung cancer || id:ieu-a-966	Lung cancer	Lung cancer || ||	TRUE	igd	1	2387101	0.0119	1.74e-08	77096	ieu-b-42	schizophrenia || id:ieu-b-42	TRUE	reported	igd	2	TRUE	0.000413472	31.8894
rs4702	A	G	A	G	-0.080505	-0.0113197	0.574	0.545721	FALSE	FALSE	FALSE	ieu-a-966	15	91426560	0.017996	27209	0.531997	Lung cancer || id:ieu-a-966	Lung cancer	Lung cancer || ||	TRUE	igd	15	91426560	0.0115	2.62e-12	77096	ieu-b-42	schizophrenia || id:ieu-b-42	TRUE	reported	igd	2	TRUE	0.000635246	49.0048
rs4766428	T	C	T	C	0.069395	0.0211263	0.459	0.432854	FALSE	FALSE	FALSE	ieu-a-966	12	110723245	0.019537	27209	0.278517	Lung cancer || id:ieu-a-966	Lung cancer	Lung cancer || ||	TRUE	igd	12	110723245	0.0112	6.12e-10	77096	ieu-b-42	schizophrenia || id:ieu-b-42	TRUE	reported	igd	2	TRUE	0.000497705	38.3892
rs55775495	T	C	T	C	-0.068996	-0.00426788	0.701	0.649143	FALSE	FALSE	FALSE	ieu-a-966	2	198245965	0.01905	27209	0.825261	Lung cancer || id:ieu-a-966	Lung cancer	Lung cancer || ||	TRUE	igd	2	198245965	0.0114	1.56e-09	77096	ieu-b-42	schizophrenia || id:ieu-b-42	TRUE	reported	igd	2	TRUE	0.000474898	36.6292
rs58120505	C	T	C	T	-0.082197	0.0181022	0.412	0.414486	FALSE	FALSE	FALSE	ieu-a-966	7	2029867	0.018697	27209	0.333027	Lung cancer || id:ieu-a-966	Lung cancer	Lung cancer || ||	TRUE	igd	7	2029867	0.0111	1.26e-13	77096	ieu-b-42	schizophrenia || id:ieu-b-42	TRUE	reported	igd	2	TRUE	0.000710764	54.8346
rs5995756	C	T	C	T	-0.072497	-0.000293957	0.54	0.550378	FALSE	FALSE	FALSE	ieu-a-966	22	40000313	0.017844	27209	0.987073	Lung cancer || id:ieu-a-966	Lung cancer	Lung cancer || ||	TRUE	igd	22	40000313	0.0109	2.91e-11	77096	ieu-b-42	schizophrenia || id:ieu-b-42	TRUE	reported	igd	2	TRUE	0.000573464	44.236
rs6439649	T	G	T	G	0.070999	-0.00418921	0.562	0.588183	FALSE	FALSE	FALSE	ieu-a-966	3	136371691	0.018108	27209	0.819496	Lung cancer || id:ieu-a-966	Lung cancer	Lung cancer || ||	TRUE	igd	3	136371691	0.0111	1.37e-10	77096	ieu-b-42	schizophrenia || id:ieu-b-42	TRUE	reported	igd	2	TRUE	0.000530391	40.9117
rs6704768	A	G	A	G	-0.0766	-0.0163506	0.529	0.561371	FALSE	FALSE	FALSE	ieu-a-966	2	233592501	0.018179	27209	0.369129	Lung cancer || id:ieu-a-966	Lung cancer	Lung cancer || ||	TRUE	igd	2	233592501	0.0109	2.06e-12	77096	ieu-b-42	schizophrenia || id:ieu-b-42	TRUE	reported	igd	2	TRUE	0.000640169	49.3848
rs72986630	T	C	T	C	0.1459	0.0249843	0.054	0.060955	FALSE	FALSE	FALSE	ieu-a-966	19	11849736	0.046563	27209	0.599417	Lung cancer || id:ieu-a-966	Lung cancer	Lung cancer || ||	TRUE	igd	19	11849736	0.0266	4.12e-08	77096	ieu-b-42	schizophrenia || id:ieu-b-42	TRUE	reported	igd	2	TRUE	0.000390073	30.084
rs73036062	A	G	A	G	-0.089104	0.0224824	0.21	0.2084	FALSE	FALSE	FALSE	ieu-a-966	11	133828187	0.022386	27209	0.314899	Lung cancer || id:ieu-a-966	Lung cancer	Lung cancer || ||	TRUE	igd	11	133828187	0.0135	3.68e-11	77096	ieu-b-42	schizophrenia || id:ieu-b-42	TRUE	reported	igd	2	TRUE	0.000564741	43.5628
rs73191547	T	A	T	A	0.066899	0.0234089	0.286	0.330267	FALSE	TRUE	FALSE	ieu-a-966	8	10033425	0.019583	27209	0.229908	Lung cancer || id:ieu-a-966	Lung cancer	Lung cancer || ||	TRUE	igd	8	10033425	0.0115	6.13e-09	77096	ieu-b-42	schizophrenia || id:ieu-b-42	TRUE	reported	igd	2	TRUE	0.000438754	33.8402
rs73229090	A	C	A	C	-0.0995	-0.0860002	0.121	0.112874	FALSE	FALSE	FALSE	ieu-a-966	8	27442127	0.026594	27209	0.00396196	Lung cancer || id:ieu-a-966	Lung cancer	Lung cancer || ||	TRUE	igd	8	27442127	0.0177	1.95e-08	77096	ieu-b-42	schizophrenia || id:ieu-b-42	TRUE	reported	igd	2	TRUE	0.000409722	31.6001
rs75968099	T	C	T	C	0.080104	-0.00106857	0.351	0.346823	FALSE	FALSE	FALSE	ieu-a-966	3	36858583	0.018743	27209	0.955407	Lung cancer || id:ieu-a-966	Lung cancer	Lung cancer || ||	TRUE	igd	3	36858583	0.0114	2.31e-12	77096	ieu-b-42	schizophrenia || id:ieu-b-42	TRUE	reported	igd	2	TRUE	0.000640013	49.3728
rs7601312	G	A	G	A	0.058997	-0.00122575	0.484	0.479088	FALSE	FALSE	FALSE	ieu-a-966	2	229320093	0.018037	27209	0.946827	Lung cancer || id:ieu-a-966	Lung cancer	Lung cancer || ||	TRUE	igd	2	229320093	0.0108	4.67e-08	77096	ieu-b-42	schizophrenia || id:ieu-b-42	TRUE	reported	igd	2	TRUE	0.000386912	29.8402
rs760648	A	G	A	G	0.075803	0.00420913	0.416	0.404493	FALSE	FALSE	FALSE	ieu-a-966	22	42571028	0.019689	27209	0.833242	Lung cancer || id:ieu-a-966	Lung cancer	Lung cancer || ||	TRUE	igd	22	42571028	0.0118	1.27e-10	77096	ieu-b-42	schizophrenia || id:ieu-b-42	TRUE	reported	igd	2	TRUE	0.000534989	41.2665
rs76355118	G	A	G	A	0.154399	0.0154254	0.041	0.048101	FALSE	FALSE	FALSE	ieu-a-966	2	149412005	0.045174	27209	0.740323	Lung cancer || id:ieu-a-966	Lung cancer	Lung cancer || ||	TRUE	igd	2	149412005	0.0278	2.78e-08	77096	ieu-b-42	schizophrenia || id:ieu-b-42	TRUE	reported	igd	2	TRUE	0.000399939	30.8452
rs7801375	G	A	G	A	0.083001	0.00702361	0.847	0.847948	FALSE	FALSE	FALSE	ieu-a-966	7	131567263	0.02427	27209	0.779144	Lung cancer || id:ieu-a-966	Lung cancer	Lung cancer || ||	TRUE	igd	7	131567263	0.015	2.88e-08	77096	ieu-b-42	schizophrenia || id:ieu-b-42	TRUE	reported	igd	2	TRUE	0.00039699	30.6177
rs7819570	T	G	T	G	0.076498	0.0115283	0.207	0.194171	FALSE	FALSE	FALSE	ieu-a-966	8	89588626	0.022929	27209	0.619055	Lung cancer || id:ieu-a-966	Lung cancer	Lung cancer || ||	TRUE	igd	8	89588626	0.014	4.47e-08	77096	ieu-b-42	schizophrenia || id:ieu-b-42	TRUE	reported	igd	2	TRUE	0.000387119	29.8561
rs783540	G	A	G	A	0.059899	0.0511217	0.43	0.384058	FALSE	FALSE	FALSE	ieu-a-966	15	83254708	0.019179	27209	0.005886	Lung cancer || id:ieu-a-966	Lung cancer	Lung cancer || ||	TRUE	igd	15	83254708	0.011	4.77e-08	77096	ieu-b-42	schizophrenia || id:ieu-b-42	TRUE	reported	igd	2	TRUE	0.000384463	29.6512
rs7893279	G	T	G	T	-0.1124	0.0310606	0.125	0.112197	FALSE	FALSE	FALSE	ieu-a-966	10	18745105	0.028604	27209	0.275942	Lung cancer || id:ieu-a-966	Lung cancer	Lung cancer || ||	TRUE	igd	10	18745105	0.0175	1.24e-10	77096	ieu-b-42	schizophrenia || id:ieu-b-42	TRUE	reported	igd	2	TRUE	0.000534801	41.252
rs8055219	A	G	A	G	0.076998	-0.0443605	0.259	0.239148	FALSE	FALSE	FALSE	ieu-a-966	16	13753384	0.019969	27209	0.0374248	Lung cancer || id:ieu-a-966	Lung cancer	Lung cancer || ||	TRUE	igd	16	13753384	0.0127	1.45e-09	77096	ieu-b-42	schizophrenia || id:ieu-b-42	TRUE	reported	igd	2	TRUE	0.000476555	36.757
rs832190	T	C	T	C	-0.069897	-0.0373642	0.613	0.625853	FALSE	FALSE	FALSE	ieu-a-966	3	63842629	0.019219	27209	0.0475773	Lung cancer || id:ieu-a-966	Lung cancer	Lung cancer || ||	TRUE	igd	3	63842629	0.0113	5.73e-10	77096	ieu-b-42	schizophrenia || id:ieu-b-42	TRUE	reported	igd	2	TRUE	0.000496036	38.2603
rs9636107	G	A	G	A	0.079595	0.0353517	0.497	0.486923	FALSE	FALSE	FALSE	ieu-a-966	18	53200117	0.01835	27209	0.0498942	Lung cancer || id:ieu-a-966	Lung cancer	Lung cancer || ||	TRUE	igd	18	53200117	0.0108	2.17e-13	77096	ieu-b-42	schizophrenia || id:ieu-b-42	TRUE	reported	igd	2	TRUE	0.000704022	54.3141
rs10108725	T	C	T	C	0.073204	0.0068	0.222	0.2186	FALSE	FALSE	FALSE	ieu-b-85	8	4191202	0.01	140254	0.4996	Prostate cancer || id:ieu-b-85	Prostate cancer	Prostate cancer || ||	TRUE	igd	8	4191202	0.0133	3.32e-08	77096	ieu-b-42	schizophrenia || id:ieu-b-42	TRUE	reported	igd	2	TRUE	0.000392793	30.2939
rs1024582	G	A	G	A	-0.098904	-0.0136	0.66	0.6759	FALSE	FALSE	FALSE	ieu-b-85	12	2402246	0.009	140254	0.1323	Prostate cancer || id:ieu-b-85	Prostate cancer	Prostate cancer || ||	TRUE	igd	12	2402246	0.0115	6.27e-18	77096	ieu-b-42	schizophrenia || id:ieu-b-42	TRUE	reported	igd	2	TRUE	0.000958481	73.9641
rs10791097	G	T	G	T	-0.0766	-0.0138	0.52	0.5406	FALSE	FALSE	FALSE	ieu-b-85	11	130718630	0.0084	140254	0.0994397	Prostate cancer || id:ieu-b-85	Prostate cancer	Prostate cancer || ||	TRUE	igd	11	130718630	0.0109	2.05e-12	77096	ieu-b-42	schizophrenia || id:ieu-b-42	TRUE	reported	igd	2	TRUE	0.000640169	49.3848
rs11027857	A	G	A	G	0.063998	-0.011	0.587	0.5223	FALSE	FALSE	FALSE	ieu-b-85	11	24403620	0.0084	140254	0.1873	Prostate cancer || id:ieu-b-85	Prostate cancer	Prostate cancer || ||	TRUE	igd	11	24403620	0.0109	3.67e-09	77096	ieu-b-42	schizophrenia || id:ieu-b-42	TRUE	reported	igd	2	TRUE	0.000446945	34.4722
rs1106568	A	G	A	G	-0.069404	-0.0124	0.744	0.7574	FALSE	FALSE	FALSE	ieu-b-85	4	176861301	0.0093	140254	0.1841	Prostate cancer || id:ieu-b-85	Prostate cancer	Prostate cancer || ||	TRUE	igd	4	176861301	0.0125	2.85e-08	77096	ieu-b-42	schizophrenia || id:ieu-b-42	TRUE	reported	igd	2	TRUE	0.000399709	30.8275
rs111294930	G	A	G	A	-0.087699	0.0206	0.219	0.2838	FALSE	FALSE	FALSE	ieu-b-85	5	152177121	0.0089	140254	0.0200498	Prostate cancer || id:ieu-b-85	Prostate cancer	Prostate cancer || ||	TRUE	igd	5	152177121	0.0143	9.29e-10	77096	ieu-b-42	schizophrenia || id:ieu-b-42	TRUE	reported	igd	2	TRUE	0.000487611	37.6102
rs11139497	A	T	A	T	0.0656	-0.0174	0.336	0.3154	FALSE	TRUE	FALSE	ieu-b-85	9	84739941	0.0089	140254	0.0495097	Prostate cancer || id:ieu-b-85	Prostate cancer	Prostate cancer || ||	TRUE	igd	9	84739941	0.0118	2.65e-08	77096	ieu-b-42	schizophrenia || id:ieu-b-42	TRUE	reported	igd	2	TRUE	0.000400717	30.9053
rs11191419	A	T	A	T	-0.101601	-0.0237	0.334	0.3499	FALSE	TRUE	FALSE	ieu-b-85	10	104612335	0.0084	140254	0.00489903	Prostate cancer || id:ieu-b-85	Prostate cancer	Prostate cancer || ||	TRUE	igd	10	104612335	0.0118	6.69e-18	77096	ieu-b-42	schizophrenia || id:ieu-b-42	TRUE	reported	igd	2	TRUE	0.000960689	74.1346
rs11210892	A	G	A	G	-0.067797	0.03	0.652	0.6751	FALSE	FALSE	FALSE	ieu-b-85	1	44100084	0.0086	140254	0.000516797	Prostate cancer || id:ieu-b-85	Prostate cancer	Prostate cancer || ||	TRUE	igd	1	44100084	0.0115	3.42e-09	77096	ieu-b-42	schizophrenia || id:ieu-b-42	TRUE	reported	igd	2	TRUE	0.000450607	34.7547
rs113397282	C	T	C	T	-0.145	0.0235	0.153	0.066	FALSE	FALSE	FALSE	ieu-b-85	6	32488050	0.0224	140254	0.2949	Prostate cancer || id:ieu-b-85	Prostate cancer	Prostate cancer || ||	TRUE	igd	6	32488050	0.0176	1.8e-16	77096	ieu-b-42	schizophrenia || id:ieu-b-42	TRUE	reported	igd	2	TRUE	0.000879623	67.8734
rs11658257	C	G	C	G	-0.066204	-0.0302	0.573	0.6783	FALSE	TRUE	TRUE	ieu-b-85	17	17956459	0.0084	140254	0.000348401	Prostate cancer || id:ieu-b-85	Prostate cancer	Prostate cancer || ||	TRUE	igd	17	17956459	0.0115	8.34e-09	77096	ieu-b-42	schizophrenia || id:ieu-b-42	TRUE	reported	igd	2	FALSE	0.000429689	33.1407
rs11682175	C	T	C	T	0.073496	0.0178	0.439	0.4667	FALSE	FALSE	FALSE	ieu-b-85	2	57987593	0.008	140254	0.0262597	Prostate cancer || id:ieu-b-85	Prostate cancer	Prostate cancer || ||	TRUE	igd	2	57987593	0.0109	1.58e-11	77096	ieu-b-42	schizophrenia || id:ieu-b-42	TRUE	reported	igd	2	TRUE	0.000589368	45.4635
rs11693094	T	C	T	C	-0.073603	-0.007	0.429	0.4606	FALSE	FALSE	FALSE	ieu-b-85	2	185601420	0.0081	140254	0.3863	Prostate cancer || id:ieu-b-85	Prostate cancer	Prostate cancer || ||	TRUE	igd	2	185601420	0.011	2.17e-11	77096	ieu-b-42	schizophrenia || id:ieu-b-42	TRUE	reported	igd	2	TRUE	0.000580392	44.7708
rs11693528	G	C	G	C	0.102797	0.0244	0.185	0.1893	FALSE	TRUE	FALSE	ieu-b-85	2	200736507	0.0102	140254	0.0165798	Prostate cancer || id:ieu-b-85	Prostate cancer	Prostate cancer || ||	TRUE	igd	2	200736507	0.0136	4.73e-14	77096	ieu-b-42	schizophrenia || id:ieu-b-42	TRUE	reported	igd	2	TRUE	0.000740508	57.131
rs117074560	T	C	T	C	-0.156595	-0.0467	0.037	0.0511	FALSE	FALSE	FALSE	ieu-b-85	6	96459651	0.0194	140254	0.0162499	Prostate cancer || id:ieu-b-85	Prostate cancer	Prostate cancer || ||	TRUE	igd	6	96459651	0.0277	1.66e-08	77096	ieu-b-42	schizophrenia || id:ieu-b-42	TRUE	reported	igd	2	TRUE	0.000414366	31.9584
rs11740474	T	A	T	A	0.062695	-0.0035	0.412	0.4173	FALSE	TRUE	FALSE	ieu-b-85	5	153680747	0.0083	140254	0.672901	Prostate cancer || id:ieu-b-85	Prostate cancer	Prostate cancer || ||	TRUE	igd	5	153680747	0.0112	2e-08	77096	ieu-b-42	schizophrenia || id:ieu-b-42	TRUE	reported	igd	2	TRUE	0.000406276	31.3342
rs1191551	G	T	G	T	-0.071697	-0.0079	0.784	0.7718	FALSE	FALSE	FALSE	ieu-b-85	14	30000405	0.0096	140254	0.4132	Prostate cancer || id:ieu-b-85	Prostate cancer	Prostate cancer || ||	TRUE	igd	14	30000405	0.0131	4.21e-08	77096	ieu-b-42	schizophrenia || id:ieu-b-42	TRUE	reported	igd	2	TRUE	0.000388382	29.9535
rs12062861	A	G	A	G	-0.091096	0.0398	0.175	0.1569	FALSE	FALSE	FALSE	ieu-b-85	1	150017281	0.0111	140254	0.000334203	Prostate cancer || id:ieu-b-85	Prostate cancer	Prostate cancer || ||	TRUE	igd	1	150017281	0.0149	9.66e-10	77096	ieu-b-42	schizophrenia || id:ieu-b-42	TRUE	reported	igd	2	TRUE	0.0004846	37.3779
rs1233578	G	A	G	A	-0.196397	-0.0538	0.149	0.1402	FALSE	FALSE	FALSE	ieu-b-85	6	28712247	0.0115	140254	3.15e-06	Prostate cancer || id:ieu-b-85	Prostate cancer	Prostate cancer || ||	TRUE	igd	6	28712247	0.0164	6.17e-33	77096	ieu-b-42	schizophrenia || id:ieu-b-42	TRUE	reported	igd	2	TRUE	0.00185671	143.407
rs12691307	G	A	G	A	-0.071902	-0.0296	0.478	0.5427	FALSE	FALSE	FALSE	ieu-b-85	16	29939877	0.0082	140254	0.000325897	Prostate cancer || id:ieu-b-85	Prostate cancer	Prostate cancer || ||	TRUE	igd	16	29939877	0.0113	2.03e-10	77096	ieu-b-42	schizophrenia || id:ieu-b-42	TRUE	reported	igd	2	TRUE	0.000524886	40.4868
rs12704290	A	G	A	G	-0.106105	0.0185	0.131	0.1228	FALSE	FALSE	FALSE	ieu-b-85	7	86427626	0.0122	140254	0.1304	Prostate cancer || id:ieu-b-85	Prostate cancer	Prostate cancer || ||	TRUE	igd	7	86427626	0.0168	2.59e-10	77096	ieu-b-42	schizophrenia || id:ieu-b-42	TRUE	reported	igd	2	TRUE	0.000517126	39.888
rs12826178	T	G	T	G	-0.168206	0.0147	0.073	0.0754	FALSE	FALSE	FALSE	ieu-b-85	12	57622371	0.0158	140254	0.3527	Prostate cancer || id:ieu-b-85	Prostate cancer	Prostate cancer || ||	TRUE	igd	12	57622371	0.0244	5.7e-12	77096	ieu-b-42	schizophrenia || id:ieu-b-42	TRUE	reported	igd	2	TRUE	0.000616033	47.5217
rs12887734	T	G	T	G	0.088304	0.0218	0.273	0.2877	FALSE	FALSE	FALSE	ieu-b-85	14	104046834	0.0087	140254	0.0122501	Prostate cancer || id:ieu-b-85	Prostate cancer	Prostate cancer || ||	TRUE	igd	14	104046834	0.0121	3.72e-13	77096	ieu-b-42	schizophrenia || id:ieu-b-42	TRUE	reported	igd	2	TRUE	0.000690332	53.2573
rs12932476	G	C	G	C	-0.059702	-0.0239	0.512	0.5216	FALSE	TRUE	TRUE	ieu-b-85	16	63709630	0.0083	140254	0.00400304	Prostate cancer || id:ieu-b-85	Prostate cancer	Prostate cancer || ||	TRUE	igd	16	63709630	0.0109	4.62e-08	77096	ieu-b-42	schizophrenia || id:ieu-b-42	TRUE	reported	igd	2	FALSE	0.000388977	29.9995
rs13240464	C	T	C	T	-0.080704	-0.0041	0.379	0.3348	FALSE	FALSE	FALSE	ieu-b-85	7	110898915	0.0086	140254	0.6278	Prostate cancer || id:ieu-b-85	Prostate cancer	Prostate cancer || ||	TRUE	igd	7	110898915	0.0116	3.12e-12	77096	ieu-b-42	schizophrenia || id:ieu-b-42	TRUE	reported	igd	2	TRUE	0.000627436	48.402
rs13261481	G	T	G	T	-0.062402	0.0055	0.591	0.5965	FALSE	FALSE	FALSE	ieu-b-85	8	60701801	0.0086	140254	0.5214	Prostate cancer || id:ieu-b-85	Prostate cancer	Prostate cancer || ||	TRUE	igd	8	60701801	0.011	1.66e-08	77096	ieu-b-42	schizophrenia || id:ieu-b-42	TRUE	reported	igd	2	TRUE	0.000417252	32.1811
rs1339227	T	C	T	C	-0.063302	-0.0076	0.355	0.3607	FALSE	FALSE	FALSE	ieu-b-85	6	73155701	0.0084	140254	0.366	Prostate cancer || id:ieu-b-85	Prostate cancer	Prostate cancer || ||	TRUE	igd	6	73155701	0.0114	3.06e-08	77096	ieu-b-42	schizophrenia || id:ieu-b-42	TRUE	reported	igd	2	TRUE	0.000399779	30.8329
rs1498232	C	T	C	T	-0.072004	0.0062	0.697	0.6867	FALSE	FALSE	FALSE	ieu-b-85	1	30433951	0.0089	140254	0.4859	Prostate cancer || id:ieu-b-85	Prostate cancer	Prostate cancer || ||	TRUE	igd	1	30433951	0.0118	1.21e-09	77096	ieu-b-42	schizophrenia || id:ieu-b-42	TRUE	reported	igd	2	TRUE	0.000482734	37.2339
rs1509378	G	A	G	A	-0.0692	0.0091	0.646	0.6444	FALSE	FALSE	FALSE	ieu-b-85	2	22754466	0.009	140254	0.3153	Prostate cancer || id:ieu-b-85	Prostate cancer	Prostate cancer || ||	TRUE	igd	2	22754466	0.0119	5.39e-09	77096	ieu-b-42	schizophrenia || id:ieu-b-42	TRUE	reported	igd	2	TRUE	0.000438426	33.8148
rs1615350	T	C	T	C	-0.0851	-0.0065	0.734	0.7511	FALSE	FALSE	FALSE	ieu-b-85	12	123650335	0.0094	140254	0.4871	Prostate cancer || id:ieu-b-85	Prostate cancer	Prostate cancer || ||	TRUE	igd	12	123650335	0.0123	4.26e-12	77096	ieu-b-42	schizophrenia || id:ieu-b-42	TRUE	reported	igd	2	TRUE	0.000620508	47.8672
rs16867576	G	A	G	A	-0.095801	0.0053	0.12	0.1269	FALSE	FALSE	FALSE	ieu-b-85	5	88746331	0.0127	140254	0.6751	Prostate cancer || id:ieu-b-85	Prostate cancer	Prostate cancer || ||	TRUE	igd	5	88746331	0.017	1.6e-08	77096	ieu-b-42	schizophrenia || id:ieu-b-42	TRUE	reported	igd	2	TRUE	0.000411748	31.7564
rs1702294	C	T	C	T	0.118401	0.005	0.784	0.7988	FALSE	FALSE	FALSE	ieu-b-85	1	98501984	0.0101	140254	0.6188	Prostate cancer || id:ieu-b-85	Prostate cancer	Prostate cancer || ||	TRUE	igd	1	98501984	0.0138	1.03e-17	77096	ieu-b-42	schizophrenia || id:ieu-b-42	TRUE	reported	igd	2	TRUE	0.000953907	73.6108
rs17108967	C	T	C	T	0.065296	-0.0069	0.343	0.3385	FALSE	FALSE	FALSE	ieu-b-85	14	71542168	0.0086	140254	0.4258	Prostate cancer || id:ieu-b-85	Prostate cancer	Prostate cancer || ||	TRUE	igd	14	71542168	0.0115	1.21e-08	77096	ieu-b-42	schizophrenia || id:ieu-b-42	TRUE	reported	igd	2	TRUE	0.000417988	32.2379
rs17194490	T	G	T	G	0.0966	-0.0057	0.165	0.1599	FALSE	FALSE	FALSE	ieu-b-85	3	2547786	0.0112	140254	0.6087	Prostate cancer || id:ieu-b-85	Prostate cancer	Prostate cancer || ||	TRUE	igd	3	2547786	0.0148	6.38e-11	77096	ieu-b-42	schizophrenia || id:ieu-b-42	TRUE	reported	igd	2	TRUE	0.00055228	42.601
rs186545906	A	G	A	G	-0.118795	0.0035	0.108	0.0315	FALSE	FALSE	FALSE	ieu-b-85	6	32478432	0.0313	140254	0.9102	Prostate cancer || id:ieu-b-85	Prostate cancer	Prostate cancer || ||	TRUE	igd	6	32478432	0.0196	1.41e-09	77096	ieu-b-42	schizophrenia || id:ieu-b-42	TRUE	reported	igd	2	TRUE	0.000476261	36.7344
rs2053079	G	A	G	A	0.071797	0.004	0.265	0.2427	FALSE	FALSE	FALSE	ieu-b-85	19	30987423	0.0093	140254	0.6648	Prostate cancer || id:ieu-b-85	Prostate cancer	Prostate cancer || ||	TRUE	igd	19	30987423	0.0127	1.74e-08	77096	ieu-b-42	schizophrenia || id:ieu-b-42	TRUE	reported	igd	2	TRUE	0.000414375	31.9591
rs2103655	A	G	A	G	0.0766	-0.0097	0.664	0.6971	FALSE	FALSE	FALSE	ieu-b-85	20	37425958	0.0094	140254	0.3012	Prostate cancer || id:ieu-b-85	Prostate cancer	Prostate cancer || ||	TRUE	igd	20	37425958	0.0119	1.24e-10	77096	ieu-b-42	schizophrenia || id:ieu-b-42	TRUE	reported	igd	2	TRUE	0.000537154	41.4336
rs215411	A	T	A	T	0.0692	-0.0051	0.327	0.332	FALSE	TRUE	FALSE	ieu-b-85	4	23423603	0.0087	140254	0.559399	Prostate cancer || id:ieu-b-85	Prostate cancer	Prostate cancer || ||	TRUE	igd	4	23423603	0.0115	1.68e-09	77096	ieu-b-42	schizophrenia || id:ieu-b-42	TRUE	reported	igd	2	TRUE	0.000469441	36.2081
rs2332700	G	C	G	C	-0.0771	0.0011	0.756	0.7495	FALSE	TRUE	FALSE	ieu-b-85	14	72417326	0.0094	140254	0.9046	Prostate cancer || id:ieu-b-85	Prostate cancer	Prostate cancer || ||	TRUE	igd	14	72417326	0.0125	7.38e-10	77096	ieu-b-42	schizophrenia || id:ieu-b-42	TRUE	reported	igd	2	TRUE	0.000493222	38.0432
rs2414718	A	G	A	G	0.069797	0.0058	0.617	0.585	FALSE	FALSE	FALSE	ieu-b-85	15	61863133	0.0081	140254	0.4749	Prostate cancer || id:ieu-b-85	Prostate cancer	Prostate cancer || ||	TRUE	igd	15	61863133	0.011	1.98e-10	77096	ieu-b-42	schizophrenia || id:ieu-b-42	TRUE	reported	igd	2	TRUE	0.000521951	40.2603
rs2514218	T	C	T	C	-0.072205	-0.0163	0.327	0.3418	FALSE	FALSE	FALSE	ieu-b-85	11	113392994	0.0087	140254	0.0609298	Prostate cancer || id:ieu-b-85	Prostate cancer	Prostate cancer || ||	TRUE	igd	11	113392994	0.0116	4.64e-10	77096	ieu-b-42	schizophrenia || id:ieu-b-42	TRUE	reported	igd	2	TRUE	0.000502306	38.7443
rs2535627	C	T	C	T	-0.070403	-0.0074	0.503	0.4777	FALSE	FALSE	FALSE	ieu-b-85	3	52845105	0.0079	140254	0.3484	Prostate cancer || id:ieu-b-85	Prostate cancer	Prostate cancer || ||	TRUE	igd	3	52845105	0.0109	1.17e-10	77096	ieu-b-42	schizophrenia || id:ieu-b-42	TRUE	reported	igd	2	TRUE	0.000540832	41.7175
rs2693698	G	A	G	A	0.061705	-0.0197	0.551	0.5536	FALSE	FALSE	FALSE	ieu-b-85	14	99719219	0.0082	140254	0.0163099	Prostate cancer || id:ieu-b-85	Prostate cancer	Prostate cancer || ||	TRUE	igd	14	99719219	0.0111	2.99e-08	77096	ieu-b-42	schizophrenia || id:ieu-b-42	TRUE	reported	igd	2	TRUE	0.000400672	30.9018
rs28681284	T	C	T	C	-0.101601	-0.007	0.214	0.215	FALSE	FALSE	FALSE	ieu-b-85	15	78908565	0.0098	140254	0.4788	Prostate cancer || id:ieu-b-85	Prostate cancer	Prostate cancer || ||	TRUE	igd	15	78908565	0.0141	6.35e-13	77096	ieu-b-42	schizophrenia || id:ieu-b-42	TRUE	reported	igd	2	TRUE	0.000673029	51.9214
rs2905432	A	G	A	G	-0.066001	-0.031	0.671	0.6468	FALSE	FALSE	FALSE	ieu-b-85	19	19484295	0.0085	140254	0.000263299	Prostate cancer || id:ieu-b-85	Prostate cancer	Prostate cancer || ||	TRUE	igd	19	19484295	0.0114	7.51e-09	77096	ieu-b-42	schizophrenia || id:ieu-b-42	TRUE	reported	igd	2	TRUE	0.000434581	33.5182
rs2909457	A	G	A	G	-0.059697	0.012	0.574	0.5625	FALSE	FALSE	FALSE	ieu-b-85	2	162845855	0.0081	140254	0.1378	Prostate cancer || id:ieu-b-85	Prostate cancer	Prostate cancer || ||	TRUE	igd	2	162845855	0.0109	4.25e-08	77096	ieu-b-42	schizophrenia || id:ieu-b-42	TRUE	reported	igd	2	TRUE	0.000388912	29.9944
rs301797	A	C	A	C	0.066097	0.0008	0.322	0.3221	FALSE	FALSE	FALSE	ieu-b-85	1	8487323	0.009	140254	0.9297	Prostate cancer || id:ieu-b-85	Prostate cancer	Prostate cancer || ||	TRUE	igd	1	8487323	0.0116	1.2e-08	77096	ieu-b-42	schizophrenia || id:ieu-b-42	TRUE	reported	igd	2	TRUE	0.000420952	32.4666
rs34796896	A	G	A	G	-0.082198	0.0113	0.194	0.2028	FALSE	FALSE	FALSE	ieu-b-85	3	180623255	0.01	140254	0.2624	Prostate cancer || id:ieu-b-85	Prostate cancer	Prostate cancer || ||	TRUE	igd	3	180623255	0.0135	1.23e-09	77096	ieu-b-42	schizophrenia || id:ieu-b-42	TRUE	reported	igd	2	TRUE	0.000480634	37.0718
rs35225200	C	A	C	A	0.144795	-0.0057	0.087	0.0753	FALSE	FALSE	FALSE	ieu-b-85	4	103146888	0.0159	140254	0.721601	Prostate cancer || id:ieu-b-85	Prostate cancer	Prostate cancer || ||	TRUE	igd	4	103146888	0.0203	9.56e-13	77096	ieu-b-42	schizophrenia || id:ieu-b-42	TRUE	reported	igd	2	TRUE	0.000659473	50.8749
rs35324223	G	A	G	A	0.091995	-0.0233	0.181	0.1663	FALSE	FALSE	FALSE	ieu-b-85	11	46402852	0.0109	140254	0.0326099	Prostate cancer || id:ieu-b-85	Prostate cancer	Prostate cancer || ||	TRUE	igd	11	46402852	0.0145	2.04e-10	77096	ieu-b-42	schizophrenia || id:ieu-b-42	TRUE	reported	igd	2	TRUE	0.000521836	40.2514
rs35998080	T	G	T	G	0.069004	0.0086	0.45	0.4446	FALSE	FALSE	FALSE	ieu-b-85	1	73278615	0.0082	140254	0.2951	Prostate cancer || id:ieu-b-85	Prostate cancer	Prostate cancer || ||	TRUE	igd	1	73278615	0.0112	6.95e-10	77096	ieu-b-42	schizophrenia || id:ieu-b-42	TRUE	reported	igd	2	TRUE	0.000492115	37.9578
rs36068923	G	A	G	A	0.083501	0.0015	0.187	0.1988	FALSE	FALSE	FALSE	ieu-b-85	8	111485761	0.01	140254	0.8831	Prostate cancer || id:ieu-b-85	Prostate cancer	Prostate cancer || ||	TRUE	igd	8	111485761	0.0134	4.14e-10	77096	ieu-b-42	schizophrenia || id:ieu-b-42	TRUE	reported	igd	2	TRUE	0.000503412	38.8296
rs3798869	A	G	A	G	-0.066802	0.0101	0.464	0.4392	FALSE	FALSE	FALSE	ieu-b-85	6	84328660	0.0083	140254	0.2254	Prostate cancer || id:ieu-b-85	Prostate cancer	Prostate cancer || ||	TRUE	igd	6	84328660	0.011	1.09e-09	77096	ieu-b-42	schizophrenia || id:ieu-b-42	TRUE	reported	igd	2	TRUE	0.000478139	36.8793
rs3849046	T	C	T	C	0.062496	-0.0102	0.508	0.5442	FALSE	FALSE	FALSE	ieu-b-85	5	137851192	0.0084	140254	0.2272	Prostate cancer || id:ieu-b-85	Prostate cancer	Prostate cancer || ||	TRUE	igd	5	137851192	0.0109	1.04e-08	77096	ieu-b-42	schizophrenia || id:ieu-b-42	TRUE	reported	igd	2	TRUE	0.000426221	32.8731
rs4129585	C	A	C	A	-0.079301	0.0199	0.558	0.563	FALSE	FALSE	FALSE	ieu-b-85	8	143312933	0.0081	140254	0.01388	Prostate cancer || id:ieu-b-85	Prostate cancer	Prostate cancer || ||	TRUE	igd	8	143312933	0.0109	3.61e-13	77096	ieu-b-42	schizophrenia || id:ieu-b-42	TRUE	reported	igd	2	TRUE	0.000686079	52.9289
rs4391122	G	A	G	A	0.078005	0.0011	0.462	0.4894	FALSE	FALSE	FALSE	ieu-b-85	5	60598543	0.0081	140254	0.892	Prostate cancer || id:ieu-b-85	Prostate cancer	Prostate cancer || ||	TRUE	igd	5	60598543	0.0109	8.9e-13	77096	ieu-b-42	schizophrenia || id:ieu-b-42	TRUE	reported	igd	2	TRUE	0.000663853	51.213
rs4523957	T	G	T	G	0.069703	0.0011	0.603	0.6223	FALSE	FALSE	FALSE	ieu-b-85	17	2208899	0.0084	140254	0.8961	Prostate cancer || id:ieu-b-85	Prostate cancer	Prostate cancer || ||	TRUE	igd	17	2208899	0.0115	1.4e-09	77096	ieu-b-42	schizophrenia || id:ieu-b-42	TRUE	reported	igd	2	TRUE	0.000476287	36.7363
rs4648845	T	C	T	C	0.067201	0.0045	0.479	0.5039	FALSE	FALSE	FALSE	ieu-b-85	1	2387101	0.0089	140254	0.6169	Prostate cancer || id:ieu-b-85	Prostate cancer	Prostate cancer || ||	TRUE	igd	1	2387101	0.0119	1.74e-08	77096	ieu-b-42	schizophrenia || id:ieu-b-42	TRUE	reported	igd	2	TRUE	0.000413472	31.8894
rs4702	A	G	A	G	-0.080505	-0.0179	0.574	0.5554	FALSE	FALSE	FALSE	ieu-b-85	15	91426560	0.0081	140254	0.02688	Prostate cancer || id:ieu-b-85	Prostate cancer	Prostate cancer || ||	TRUE	igd	15	91426560	0.0115	2.62e-12	77096	ieu-b-42	schizophrenia || id:ieu-b-42	TRUE	reported	igd	2	TRUE	0.000635246	49.0048
rs4766428	T	C	T	C	0.069395	0.0182	0.459	0.4403	FALSE	FALSE	FALSE	ieu-b-85	12	110723245	0.0084	140254	0.02913	Prostate cancer || id:ieu-b-85	Prostate cancer	Prostate cancer || ||	TRUE	igd	12	110723245	0.0112	6.12e-10	77096	ieu-b-42	schizophrenia || id:ieu-b-42	TRUE	reported	igd	2	TRUE	0.000497705	38.3892
rs55775495	T	C	T	C	-0.068996	0.0037	0.701	0.6443	FALSE	FALSE	FALSE	ieu-b-85	2	198245965	0.0088	140254	0.672699	Prostate cancer || id:ieu-b-85	Prostate cancer	Prostate cancer || ||	TRUE	igd	2	198245965	0.0114	1.56e-09	77096	ieu-b-42	schizophrenia || id:ieu-b-42	TRUE	reported	igd	2	TRUE	0.000474898	36.6292
rs58120505	C	T	C	T	-0.082197	0.021	0.412	0.4078	FALSE	FALSE	FALSE	ieu-b-85	7	2029867	0.0083	140254	0.01148	Prostate cancer || id:ieu-b-85	Prostate cancer	Prostate cancer || ||	TRUE	igd	7	2029867	0.0111	1.26e-13	77096	ieu-b-42	schizophrenia || id:ieu-b-42	TRUE	reported	igd	2	TRUE	0.000710764	54.8346
rs5995756	C	T	C	T	-0.072497	0.0018	0.54	0.5547	FALSE	FALSE	FALSE	ieu-b-85	22	40000313	0.0081	140254	0.8209	Prostate cancer || id:ieu-b-85	Prostate cancer	Prostate cancer || ||	TRUE	igd	22	40000313	0.0109	2.91e-11	77096	ieu-b-42	schizophrenia || id:ieu-b-42	TRUE	reported	igd	2	TRUE	0.000573464	44.236
rs6439649	T	G	T	G	0.070999	-0.0177	0.562	0.5819	FALSE	FALSE	FALSE	ieu-b-85	3	136371691	0.0082	140254	0.0307298	Prostate cancer || id:ieu-b-85	Prostate cancer	Prostate cancer || ||	TRUE	igd	3	136371691	0.0111	1.37e-10	77096	ieu-b-42	schizophrenia || id:ieu-b-42	TRUE	reported	igd	2	TRUE	0.000530391	40.9117
rs6704768	A	G	A	G	-0.0766	-0.0207	0.529	0.5597	FALSE	FALSE	FALSE	ieu-b-85	2	233592501	0.008	140254	0.00929501	Prostate cancer || id:ieu-b-85	Prostate cancer	Prostate cancer || ||	TRUE	igd	2	233592501	0.0109	2.06e-12	77096	ieu-b-42	schizophrenia || id:ieu-b-42	TRUE	reported	igd	2	TRUE	0.000640169	49.3848
rs72986630	T	C	T	C	0.1459	-0.0093	0.054	0.0623	FALSE	FALSE	FALSE	ieu-b-85	19	11849736	0.0184	140254	0.6136	Prostate cancer || id:ieu-b-85	Prostate cancer	Prostate cancer || ||	TRUE	igd	19	11849736	0.0266	4.12e-08	77096	ieu-b-42	schizophrenia || id:ieu-b-42	TRUE	reported	igd	2	TRUE	0.000390073	30.084
rs73036062	A	G	A	G	-0.089104	0.0044	0.21	0.2169	FALSE	FALSE	FALSE	ieu-b-85	11	133828187	0.0104	140254	0.670199	Prostate cancer || id:ieu-b-85	Prostate cancer	Prostate cancer || ||	TRUE	igd	11	133828187	0.0135	3.68e-11	77096	ieu-b-42	schizophrenia || id:ieu-b-42	TRUE	reported	igd	2	TRUE	0.000564741	43.5628
rs73191547	T	A	T	A	0.066899	0.0165	0.286	0.3253	FALSE	TRUE	FALSE	ieu-b-85	8	10033425	0.0088	140254	0.0598605	Prostate cancer || id:ieu-b-85	Prostate cancer	Prostate cancer || ||	TRUE	igd	8	10033425	0.0115	6.13e-09	77096	ieu-b-42	schizophrenia || id:ieu-b-42	TRUE	reported	igd	2	TRUE	0.000438754	33.8402
rs73229090	A	C	A	C	-0.0995	-0.0166	0.121	0.1114	FALSE	FALSE	FALSE	ieu-b-85	8	27442127	0.0133	140254	0.2123	Prostate cancer || id:ieu-b-85	Prostate cancer	Prostate cancer || ||	TRUE	igd	8	27442127	0.0177	1.95e-08	77096	ieu-b-42	schizophrenia || id:ieu-b-42	TRUE	reported	igd	2	TRUE	0.000409722	31.6001
rs75968099	T	C	T	C	0.080104	0.0038	0.351	0.3478	FALSE	FALSE	FALSE	ieu-b-85	3	36858583	0.0088	140254	0.668399	Prostate cancer || id:ieu-b-85	Prostate cancer	Prostate cancer || ||	TRUE	igd	3	36858583	0.0114	2.31e-12	77096	ieu-b-42	schizophrenia || id:ieu-b-42	TRUE	reported	igd	2	TRUE	0.000640013	49.3728
rs7601312	G	A	G	A	0.058997	0.0001	0.484	0.4805	FALSE	FALSE	FALSE	ieu-b-85	2	229320093	0.0082	140254	0.9903	Prostate cancer || id:ieu-b-85	Prostate cancer	Prostate cancer || ||	TRUE	igd	2	229320093	0.0108	4.67e-08	77096	ieu-b-42	schizophrenia || id:ieu-b-42	TRUE	reported	igd	2	TRUE	0.000386912	29.8402
rs760648	A	G	A	G	0.075803	-0.0061	0.416	0.4407	FALSE	FALSE	FALSE	ieu-b-85	22	42571028	0.0082	140254	0.46	Prostate cancer || id:ieu-b-85	Prostate cancer	Prostate cancer || ||	TRUE	igd	22	42571028	0.0118	1.27e-10	77096	ieu-b-42	schizophrenia || id:ieu-b-42	TRUE	reported	igd	2	TRUE	0.000534989	41.2665
rs76355118	G	A	G	A	0.154399	-0.0589	0.041	0.0442	FALSE	FALSE	FALSE	ieu-b-85	2	149412005	0.0211	140254	0.00512495	Prostate cancer || id:ieu-b-85	Prostate cancer	Prostate cancer || ||	TRUE	igd	2	149412005	0.0278	2.78e-08	77096	ieu-b-42	schizophrenia || id:ieu-b-42	TRUE	reported	igd	2	TRUE	0.000399939	30.8452
rs77149735	A	G	A	G	0.284502	0.0121	0.016	0.0253	FALSE	FALSE	FALSE	ieu-b-85	1	243555105	0.0318	140254	0.702901	Prostate cancer || id:ieu-b-85	Prostate cancer	Prostate cancer || ||	TRUE	igd	1	243555105	0.0485	4.4e-09	77096	ieu-b-42	schizophrenia || id:ieu-b-42	TRUE	reported	igd	2	TRUE	0.00044613	34.4093
rs7801375	G	A	G	A	0.083001	0.0082	0.847	0.838	FALSE	FALSE	FALSE	ieu-b-85	7	131567263	0.0114	140254	0.4697	Prostate cancer || id:ieu-b-85	Prostate cancer	Prostate cancer || ||	TRUE	igd	7	131567263	0.015	2.88e-08	77096	ieu-b-42	schizophrenia || id:ieu-b-42	TRUE	reported	igd	2	TRUE	0.00039699	30.6177
rs7819570	T	G	T	G	0.076498	-0.0042	0.207	0.1774	FALSE	FALSE	FALSE	ieu-b-85	8	89588626	0.0106	140254	0.6916	Prostate cancer || id:ieu-b-85	Prostate cancer	Prostate cancer || ||	TRUE	igd	8	89588626	0.014	4.47e-08	77096	ieu-b-42	schizophrenia || id:ieu-b-42	TRUE	reported	igd	2	TRUE	0.000387119	29.8561
rs783540	G	A	G	A	0.059899	0.0007	0.43	0.3873	FALSE	FALSE	FALSE	ieu-b-85	15	83254708	0.0082	140254	0.9336	Prostate cancer || id:ieu-b-85	Prostate cancer	Prostate cancer || ||	TRUE	igd	15	83254708	0.011	4.77e-08	77096	ieu-b-42	schizophrenia || id:ieu-b-42	TRUE	reported	igd	2	TRUE	0.000384463	29.6512
rs7893279	G	T	G	T	-0.1124	-0.0105	0.125	0.1129	FALSE	FALSE	FALSE	ieu-b-85	10	18745105	0.013	140254	0.4187	Prostate cancer || id:ieu-b-85	Prostate cancer	Prostate cancer || ||	TRUE	igd	10	18745105	0.0175	1.24e-10	77096	ieu-b-42	schizophrenia || id:ieu-b-42	TRUE	reported	igd	2	TRUE	0.000534801	41.252
rs8055219	A	G	A	G	0.076998	-0.0045	0.259	0.2321	FALSE	FALSE	FALSE	ieu-b-85	16	13753384	0.0097	140254	0.643899	Prostate cancer || id:ieu-b-85	Prostate cancer	Prostate cancer || ||	TRUE	igd	16	13753384	0.0127	1.45e-09	77096	ieu-b-42	schizophrenia || id:ieu-b-42	TRUE	reported	igd	2	TRUE	0.000476555	36.757
rs832190	T	C	T	C	-0.069897	-0.0001	0.613	0.6312	FALSE	FALSE	FALSE	ieu-b-85	3	63842629	0.0083	140254	0.9866	Prostate cancer || id:ieu-b-85	Prostate cancer	Prostate cancer || ||	TRUE	igd	3	63842629	0.0113	5.73e-10	77096	ieu-b-42	schizophrenia || id:ieu-b-42	TRUE	reported	igd	2	TRUE	0.000496036	38.2603
rs9636107	G	A	G	A	0.079595	-0.0291	0.497	0.4714	FALSE	FALSE	FALSE	ieu-b-85	18	53200117	0.008	140254	0.000295502	Prostate cancer || id:ieu-b-85	Prostate cancer	Prostate cancer || ||	TRUE	igd	18	53200117	0.0108	2.17e-13	77096	ieu-b-42	schizophrenia || id:ieu-b-42	TRUE	reported	igd	2	TRUE	0.000704022	54.3141
rs10108725	T	C	T	C	0.073204	0.047	0.222	0.194	FALSE	FALSE	FALSE	ieu-b-90	8	4191202	0.054	4671	0.390434	Oral cavity and pharyngeal cancer || id:ieu-b-90	Oral cavity and pharyngeal cancer	Oral cavity and pharyngeal cancer || ||	TRUE	igd	8	4191202	0.0133	3.32e-08	77096	ieu-b-42	schizophrenia || id:ieu-b-42	TRUE	reported	igd	2	TRUE	0.000392793	30.2939
rs1024582	G	A	G	A	-0.098904	-0.002	0.66	0.669	FALSE	FALSE	FALSE	ieu-b-90	12	2402246	0.047	4671	0.968557	Oral cavity and pharyngeal cancer || id:ieu-b-90	Oral cavity and pharyngeal cancer	Oral cavity and pharyngeal cancer || ||	TRUE	igd	12	2402246	0.0115	6.27e-18	77096	ieu-b-42	schizophrenia || id:ieu-b-42	TRUE	reported	igd	2	TRUE	0.000958481	73.9641
rs10791097	G	T	G	T	-0.0766	-0.006	0.52	0.525	FALSE	FALSE	FALSE	ieu-b-90	11	130718630	0.044	4671	0.898431	Oral cavity and pharyngeal cancer || id:ieu-b-90	Oral cavity and pharyngeal cancer	Oral cavity and pharyngeal cancer || ||	TRUE	igd	11	130718630	0.0109	2.05e-12	77096	ieu-b-42	schizophrenia || id:ieu-b-42	TRUE	reported	igd	2	TRUE	0.000640169	49.3848
rs11027857	A	G	A	G	0.063998	0	0.587	0.5	FALSE	FALSE	FALSE	ieu-b-90	11	24403620	0.043	4671	0.9932	Oral cavity and pharyngeal cancer || id:ieu-b-90	Oral cavity and pharyngeal cancer	Oral cavity and pharyngeal cancer || ||	TRUE	igd	11	24403620	0.0109	3.67e-09	77096	ieu-b-42	schizophrenia || id:ieu-b-42	TRUE	reported	igd	2	TRUE	0.000446945	34.4722
rs1106568	A	G	A	G	-0.069404	-0.037	0.744	0.777	FALSE	FALSE	FALSE	ieu-b-90	4	176861301	0.051	4670	0.4665	Oral cavity and pharyngeal cancer || id:ieu-b-90	Oral cavity and pharyngeal cancer	Oral cavity and pharyngeal cancer || ||	TRUE	igd	4	176861301	0.0125	2.85e-08	77096	ieu-b-42	schizophrenia || id:ieu-b-42	TRUE	reported	igd	2	TRUE	0.000399709	30.8275
rs111294930	G	A	G	A	-0.087699	0.001	0.219	0.284	FALSE	FALSE	FALSE	ieu-b-90	5	152177121	0.049	4671	0.986825	Oral cavity and pharyngeal cancer || id:ieu-b-90	Oral cavity and pharyngeal cancer	Oral cavity and pharyngeal cancer || ||	TRUE	igd	5	152177121	0.0143	9.29e-10	77096	ieu-b-42	schizophrenia || id:ieu-b-42	TRUE	reported	igd	2	TRUE	0.000487611	37.6102
rs11139497	A	T	A	T	0.0656	0.004	0.336	0.323	FALSE	TRUE	FALSE	ieu-b-90	9	84739941	0.047	4671	0.936575	Oral cavity and pharyngeal cancer || id:ieu-b-90	Oral cavity and pharyngeal cancer	Oral cavity and pharyngeal cancer || ||	TRUE	igd	9	84739941	0.0118	2.65e-08	77096	ieu-b-42	schizophrenia || id:ieu-b-42	TRUE	reported	igd	2	TRUE	0.000400717	30.9053
rs11191419	A	T	A	T	-0.101601	-0.03	0.334	0.351	FALSE	TRUE	FALSE	ieu-b-90	10	104612335	0.045	4671	0.502752	Oral cavity and pharyngeal cancer || id:ieu-b-90	Oral cavity and pharyngeal cancer	Oral cavity and pharyngeal cancer || ||	TRUE	igd	10	104612335	0.0118	6.69e-18	77096	ieu-b-42	schizophrenia || id:ieu-b-42	TRUE	reported	igd	2	TRUE	0.000960689	74.1346
rs11210892	A	G	A	G	-0.067797	-0.059	0.652	0.679	FALSE	FALSE	FALSE	ieu-b-90	1	44100084	0.046	4671	0.206405	Oral cavity and pharyngeal cancer || id:ieu-b-90	Oral cavity and pharyngeal cancer	Oral cavity and pharyngeal cancer || ||	TRUE	igd	1	44100084	0.0115	3.42e-09	77096	ieu-b-42	schizophrenia || id:ieu-b-42	TRUE	reported	igd	2	TRUE	0.000450607	34.7547
rs11658257	C	G	C	G	-0.066204	-0.097	0.573	0.672	FALSE	TRUE	TRUE	ieu-b-90	17	17958402	0.047	4671	0.039094	Oral cavity and pharyngeal cancer || id:ieu-b-90	Oral cavity and pharyngeal cancer	Oral cavity and pharyngeal cancer || ||	TRUE	igd	17	17956459	0.0115	8.34e-09	77096	ieu-b-42	schizophrenia || id:ieu-b-42	TRUE	reported	igd	2	FALSE	0.000429689	33.1407
rs11682175	C	T	C	T	0.073496	0.043	0.439	0.471	FALSE	FALSE	FALSE	ieu-b-90	2	57987593	0.044	4671	0.326865	Oral cavity and pharyngeal cancer || id:ieu-b-90	Oral cavity and pharyngeal cancer	Oral cavity and pharyngeal cancer || ||	TRUE	igd	2	57987593	0.0109	1.58e-11	77096	ieu-b-42	schizophrenia || id:ieu-b-42	TRUE	reported	igd	2	TRUE	0.000589368	45.4635
rs11693094	T	C	T	C	-0.073603	0.047	0.429	0.455	FALSE	FALSE	FALSE	ieu-b-90	2	185601420	0.044	4671	0.293133	Oral cavity and pharyngeal cancer || id:ieu-b-90	Oral cavity and pharyngeal cancer	Oral cavity and pharyngeal cancer || ||	TRUE	igd	2	185601420	0.011	2.17e-11	77096	ieu-b-42	schizophrenia || id:ieu-b-42	TRUE	reported	igd	2	TRUE	0.000580392	44.7708
rs11693528	G	C	G	C	0.102797	0.023	0.185	0.177	FALSE	TRUE	FALSE	ieu-b-90	2	200736507	0.057	4671	0.685253	Oral cavity and pharyngeal cancer || id:ieu-b-90	Oral cavity and pharyngeal cancer	Oral cavity and pharyngeal cancer || ||	TRUE	igd	2	200736507	0.0136	4.73e-14	77096	ieu-b-42	schizophrenia || id:ieu-b-42	TRUE	reported	igd	2	TRUE	0.000740508	57.131
rs117074560	T	C	T	C	-0.156595	-0.178	0.037	0.059	FALSE	FALSE	FALSE	ieu-b-90	6	96459651	0.101	4671	0.0786593	Oral cavity and pharyngeal cancer || id:ieu-b-90	Oral cavity and pharyngeal cancer	Oral cavity and pharyngeal cancer || ||	TRUE	igd	6	96459651	0.0277	1.66e-08	77096	ieu-b-42	schizophrenia || id:ieu-b-42	TRUE	reported	igd	2	TRUE	0.000414366	31.9584
rs11740474	T	A	T	A	0.062695	0.037	0.412	0.408	FALSE	TRUE	FALSE	ieu-b-90	5	153680747	0.046	4671	0.414793	Oral cavity and pharyngeal cancer || id:ieu-b-90	Oral cavity and pharyngeal cancer	Oral cavity and pharyngeal cancer || ||	TRUE	igd	5	153680747	0.0112	2e-08	77096	ieu-b-42	schizophrenia || id:ieu-b-42	TRUE	reported	igd	2	TRUE	0.000406276	31.3342
rs1191551	G	T	G	T	-0.071697	-0.016	0.784	0.789	FALSE	FALSE	FALSE	ieu-b-90	14	30000405	0.052	4671	0.760841	Oral cavity and pharyngeal cancer || id:ieu-b-90	Oral cavity and pharyngeal cancer	Oral cavity and pharyngeal cancer || ||	TRUE	igd	14	30000405	0.0131	4.21e-08	77096	ieu-b-42	schizophrenia || id:ieu-b-42	TRUE	reported	igd	2	TRUE	0.000388382	29.9535
rs12062861	A	G	A	G	-0.091096	-0.059	0.175	0.163	FALSE	FALSE	FALSE	ieu-b-90	1	150017281	0.06	4671	0.328971	Oral cavity and pharyngeal cancer || id:ieu-b-90	Oral cavity and pharyngeal cancer	Oral cavity and pharyngeal cancer || ||	TRUE	igd	1	150017281	0.0149	9.66e-10	77096	ieu-b-42	schizophrenia || id:ieu-b-42	TRUE	reported	igd	2	TRUE	0.0004846	37.3779
rs1233578	G	A	G	A	-0.196397	0.166	0.149	0.139	FALSE	FALSE	FALSE	ieu-b-90	6	28712247	0.061	4671	0.00678891	Oral cavity and pharyngeal cancer || id:ieu-b-90	Oral cavity and pharyngeal cancer	Oral cavity and pharyngeal cancer || ||	TRUE	igd	6	28712247	0.0164	6.17e-33	77096	ieu-b-42	schizophrenia || id:ieu-b-42	TRUE	reported	igd	2	TRUE	0.00185671	143.407
rs12691307	G	A	G	A	-0.071902	0.01	0.478	0.532	FALSE	FALSE	FALSE	ieu-b-90	16	29939877	0.044	4671	0.81998	Oral cavity and pharyngeal cancer || id:ieu-b-90	Oral cavity and pharyngeal cancer	Oral cavity and pharyngeal cancer || ||	TRUE	igd	16	29939877	0.0113	2.03e-10	77096	ieu-b-42	schizophrenia || id:ieu-b-42	TRUE	reported	igd	2	TRUE	0.000524886	40.4868
rs12704290	A	G	A	G	-0.106105	0.12	0.131	0.117	FALSE	FALSE	FALSE	ieu-b-90	7	86427626	0.067	4671	0.0700906	Oral cavity and pharyngeal cancer || id:ieu-b-90	Oral cavity and pharyngeal cancer	Oral cavity and pharyngeal cancer || ||	TRUE	igd	7	86427626	0.0168	2.59e-10	77096	ieu-b-42	schizophrenia || id:ieu-b-42	TRUE	reported	igd	2	TRUE	0.000517126	39.888
rs12826178	T	G	T	G	-0.168206	0.043	0.073	0.072	FALSE	FALSE	FALSE	ieu-b-90	12	57622371	0.086	4671	0.615843	Oral cavity and pharyngeal cancer || id:ieu-b-90	Oral cavity and pharyngeal cancer	Oral cavity and pharyngeal cancer || ||	TRUE	igd	12	57622371	0.0244	5.7e-12	77096	ieu-b-42	schizophrenia || id:ieu-b-42	TRUE	reported	igd	2	TRUE	0.000616033	47.5217
rs12887734	T	G	T	G	0.088304	0.034	0.273	0.282	FALSE	FALSE	FALSE	ieu-b-90	14	104046834	0.048	4671	0.471879	Oral cavity and pharyngeal cancer || id:ieu-b-90	Oral cavity and pharyngeal cancer	Oral cavity and pharyngeal cancer || ||	TRUE	igd	14	104046834	0.0121	3.72e-13	77096	ieu-b-42	schizophrenia || id:ieu-b-42	TRUE	reported	igd	2	TRUE	0.000690332	53.2573
rs12932476	G	C	G	C	-0.059702	-0.036	0.512	0.546	FALSE	TRUE	TRUE	ieu-b-90	16	63709630	0.044	4671	0.414957	Oral cavity and pharyngeal cancer || id:ieu-b-90	Oral cavity and pharyngeal cancer	Oral cavity and pharyngeal cancer || ||	TRUE	igd	16	63709630	0.0109	4.62e-08	77096	ieu-b-42	schizophrenia || id:ieu-b-42	TRUE	reported	igd	2	FALSE	0.000388977	29.9995
rs13240464	C	T	C	T	-0.080704	-0.065	0.379	0.353	FALSE	FALSE	FALSE	ieu-b-90	7	110898915	0.046	4671	0.157685	Oral cavity and pharyngeal cancer || id:ieu-b-90	Oral cavity and pharyngeal cancer	Oral cavity and pharyngeal cancer || ||	TRUE	igd	7	110898915	0.0116	3.12e-12	77096	ieu-b-42	schizophrenia || id:ieu-b-42	TRUE	reported	igd	2	TRUE	0.000627436	48.402
rs13261481	G	T	G	T	-0.062402	0.025	0.591	0.533	FALSE	FALSE	FALSE	ieu-b-90	8	60711404	0.043	4656	0.5485	Oral cavity and pharyngeal cancer || id:ieu-b-90	Oral cavity and pharyngeal cancer	Oral cavity and pharyngeal cancer || ||	TRUE	igd	8	60701801	0.011	1.66e-08	77096	ieu-b-42	schizophrenia || id:ieu-b-42	TRUE	reported	igd	2	TRUE	0.000417252	32.1811
rs1339227	T	C	T	C	-0.063302	0.024	0.355	0.371	FALSE	FALSE	FALSE	ieu-b-90	6	73157926	0.046	4671	0.599925	Oral cavity and pharyngeal cancer || id:ieu-b-90	Oral cavity and pharyngeal cancer	Oral cavity and pharyngeal cancer || ||	TRUE	igd	6	73155701	0.0114	3.06e-08	77096	ieu-b-42	schizophrenia || id:ieu-b-42	TRUE	reported	igd	2	TRUE	0.000399779	30.8329
rs1498232	C	T	C	T	-0.072004	-0.018	0.697	0.692	FALSE	FALSE	FALSE	ieu-b-90	1	30433951	0.048	4671	0.696763	Oral cavity and pharyngeal cancer || id:ieu-b-90	Oral cavity and pharyngeal cancer	Oral cavity and pharyngeal cancer || ||	TRUE	igd	1	30433951	0.0118	1.21e-09	77096	ieu-b-42	schizophrenia || id:ieu-b-42	TRUE	reported	igd	2	TRUE	0.000482734	37.2339
rs1509378	G	A	G	A	-0.0692	-0.037	0.646	0.665	FALSE	FALSE	FALSE	ieu-b-90	2	22754466	0.049	4671	0.45354	Oral cavity and pharyngeal cancer || id:ieu-b-90	Oral cavity and pharyngeal cancer	Oral cavity and pharyngeal cancer || ||	TRUE	igd	2	22754466	0.0119	5.39e-09	77096	ieu-b-42	schizophrenia || id:ieu-b-42	TRUE	reported	igd	2	TRUE	0.000438426	33.8148
rs1615350	T	C	T	C	-0.0851	0.011	0.734	0.736	FALSE	FALSE	FALSE	ieu-b-90	12	123650335	0.05	4671	0.824268	Oral cavity and pharyngeal cancer || id:ieu-b-90	Oral cavity and pharyngeal cancer	Oral cavity and pharyngeal cancer || ||	TRUE	igd	12	123650335	0.0123	4.26e-12	77096	ieu-b-42	schizophrenia || id:ieu-b-42	TRUE	reported	igd	2	TRUE	0.000620508	47.8672
rs16867576	G	A	G	A	-0.095801	-0.052	0.12	0.127	FALSE	FALSE	FALSE	ieu-b-90	5	88746331	0.067	4671	0.433048	Oral cavity and pharyngeal cancer || id:ieu-b-90	Oral cavity and pharyngeal cancer	Oral cavity and pharyngeal cancer || ||	TRUE	igd	5	88746331	0.017	1.6e-08	77096	ieu-b-42	schizophrenia || id:ieu-b-42	TRUE	reported	igd	2	TRUE	0.000411748	31.7564
rs1702294	C	T	C	T	0.118401	-0.049	0.784	0.821	FALSE	FALSE	FALSE	ieu-b-90	1	98501984	0.056	4671	0.383949	Oral cavity and pharyngeal cancer || id:ieu-b-90	Oral cavity and pharyngeal cancer	Oral cavity and pharyngeal cancer || ||	TRUE	igd	1	98501984	0.0138	1.03e-17	77096	ieu-b-42	schizophrenia || id:ieu-b-42	TRUE	reported	igd	2	TRUE	0.000953907	73.6108
rs17108967	C	T	C	T	0.065296	-0.021	0.343	0.363	FALSE	FALSE	FALSE	ieu-b-90	14	71542168	0.045	4671	0.638318	Oral cavity and pharyngeal cancer || id:ieu-b-90	Oral cavity and pharyngeal cancer	Oral cavity and pharyngeal cancer || ||	TRUE	igd	14	71542168	0.0115	1.21e-08	77096	ieu-b-42	schizophrenia || id:ieu-b-42	TRUE	reported	igd	2	TRUE	0.000417988	32.2379
rs17194490	T	G	T	G	0.0966	-0.121	0.165	0.169	FALSE	FALSE	FALSE	ieu-b-90	3	2547786	0.059	4671	0.0406612	Oral cavity and pharyngeal cancer || id:ieu-b-90	Oral cavity and pharyngeal cancer	Oral cavity and pharyngeal cancer || ||	TRUE	igd	3	2547786	0.0148	6.38e-11	77096	ieu-b-42	schizophrenia || id:ieu-b-42	TRUE	reported	igd	2	TRUE	0.00055228	42.601
rs2053079	G	A	G	A	0.071797	0.023	0.265	0.231	FALSE	FALSE	FALSE	ieu-b-90	19	30987423	0.051	4671	0.65854	Oral cavity and pharyngeal cancer || id:ieu-b-90	Oral cavity and pharyngeal cancer	Oral cavity and pharyngeal cancer || ||	TRUE	igd	19	30987423	0.0127	1.74e-08	77096	ieu-b-42	schizophrenia || id:ieu-b-42	TRUE	reported	igd	2	TRUE	0.000414375	31.9591
rs2103655	A	G	A	G	0.0766	-0.147	0.664	0.707	FALSE	FALSE	FALSE	ieu-b-90	20	37425958	0.047	4671	0.0018128	Oral cavity and pharyngeal cancer || id:ieu-b-90	Oral cavity and pharyngeal cancer	Oral cavity and pharyngeal cancer || ||	TRUE	igd	20	37425958	0.0119	1.24e-10	77096	ieu-b-42	schizophrenia || id:ieu-b-42	TRUE	reported	igd	2	TRUE	0.000537154	41.4336
rs215411	A	T	A	T	0.0692	0.038	0.327	0.309	FALSE	TRUE	FALSE	ieu-b-90	4	23423603	0.046	4671	0.410222	Oral cavity and pharyngeal cancer || id:ieu-b-90	Oral cavity and pharyngeal cancer	Oral cavity and pharyngeal cancer || ||	TRUE	igd	4	23423603	0.0115	1.68e-09	77096	ieu-b-42	schizophrenia || id:ieu-b-42	TRUE	reported	igd	2	TRUE	0.000469441	36.2081
rs2332700	G	C	G	C	-0.0771	0.007	0.756	0.766	FALSE	TRUE	FALSE	ieu-b-90	14	72417326	0.051	4671	0.896664	Oral cavity and pharyngeal cancer || id:ieu-b-90	Oral cavity and pharyngeal cancer	Oral cavity and pharyngeal cancer || ||	TRUE	igd	14	72417326	0.0125	7.38e-10	77096	ieu-b-42	schizophrenia || id:ieu-b-42	TRUE	reported	igd	2	TRUE	0.000493222	38.0432
rs2414718	A	G	A	G	0.069797	0.025	0.617	0.581	FALSE	FALSE	FALSE	ieu-b-90	15	61863133	0.044	4671	0.569567	Oral cavity and pharyngeal cancer || id:ieu-b-90	Oral cavity and pharyngeal cancer	Oral cavity and pharyngeal cancer || ||	TRUE	igd	15	61863133	0.011	1.98e-10	77096	ieu-b-42	schizophrenia || id:ieu-b-42	TRUE	reported	igd	2	TRUE	0.000521951	40.2603
rs2514218	T	C	T	C	-0.072205	0.002	0.327	0.363	FALSE	FALSE	FALSE	ieu-b-90	11	113392994	0.045	4671	0.971755	Oral cavity and pharyngeal cancer || id:ieu-b-90	Oral cavity and pharyngeal cancer	Oral cavity and pharyngeal cancer || ||	TRUE	igd	11	113392994	0.0116	4.64e-10	77096	ieu-b-42	schizophrenia || id:ieu-b-42	TRUE	reported	igd	2	TRUE	0.000502306	38.7443
rs2535627	C	T	C	T	-0.070403	0.055	0.503	0.468	FALSE	FALSE	FALSE	ieu-b-90	3	52845105	0.043	4671	0.201526	Oral cavity and pharyngeal cancer || id:ieu-b-90	Oral cavity and pharyngeal cancer	Oral cavity and pharyngeal cancer || ||	TRUE	igd	3	52845105	0.0109	1.17e-10	77096	ieu-b-42	schizophrenia || id:ieu-b-42	TRUE	reported	igd	2	TRUE	0.000540832	41.7175
rs2693698	G	A	G	A	0.061705	-0.12	0.551	0.562	FALSE	FALSE	FALSE	ieu-b-90	14	99719219	0.043	4670	0.00554396	Oral cavity and pharyngeal cancer || id:ieu-b-90	Oral cavity and pharyngeal cancer	Oral cavity and pharyngeal cancer || ||	TRUE	igd	14	99719219	0.0111	2.99e-08	77096	ieu-b-42	schizophrenia || id:ieu-b-42	TRUE	reported	igd	2	TRUE	0.000400672	30.9018
rs28681284	T	C	T	C	-0.101601	-0.034	0.214	0.208	FALSE	FALSE	FALSE	ieu-b-90	15	78908565	0.053	4671	0.523552	Oral cavity and pharyngeal cancer || id:ieu-b-90	Oral cavity and pharyngeal cancer	Oral cavity and pharyngeal cancer || ||	TRUE	igd	15	78908565	0.0141	6.35e-13	77096	ieu-b-42	schizophrenia || id:ieu-b-42	TRUE	reported	igd	2	TRUE	0.000673029	51.9214
rs2905432	A	G	A	G	-0.066001	-0.09	0.671	0.652	FALSE	FALSE	FALSE	ieu-b-90	19	19484295	0.047	4671	0.0568094	Oral cavity and pharyngeal cancer || id:ieu-b-90	Oral cavity and pharyngeal cancer	Oral cavity and pharyngeal cancer || ||	TRUE	igd	19	19484295	0.0114	7.51e-09	77096	ieu-b-42	schizophrenia || id:ieu-b-42	TRUE	reported	igd	2	TRUE	0.000434581	33.5182
rs2909457	A	G	A	G	-0.059697	-0.042	0.574	0.564	FALSE	FALSE	FALSE	ieu-b-90	2	162845855	0.044	4671	0.333187	Oral cavity and pharyngeal cancer || id:ieu-b-90	Oral cavity and pharyngeal cancer	Oral cavity and pharyngeal cancer || ||	TRUE	igd	2	162845855	0.0109	4.25e-08	77096	ieu-b-42	schizophrenia || id:ieu-b-42	TRUE	reported	igd	2	TRUE	0.000388912	29.9944
rs301797	A	C	A	C	0.066097	0.054	0.322	0.301	FALSE	FALSE	FALSE	ieu-b-90	1	8487323	0.046	4671	0.235916	Oral cavity and pharyngeal cancer || id:ieu-b-90	Oral cavity and pharyngeal cancer	Oral cavity and pharyngeal cancer || ||	TRUE	igd	1	8487323	0.0116	1.2e-08	77096	ieu-b-42	schizophrenia || id:ieu-b-42	TRUE	reported	igd	2	TRUE	0.000420952	32.4666
rs34796896	A	G	A	G	-0.082198	0.051	0.194	0.222	FALSE	FALSE	FALSE	ieu-b-90	3	180623255	0.052	4671	0.326911	Oral cavity and pharyngeal cancer || id:ieu-b-90	Oral cavity and pharyngeal cancer	Oral cavity and pharyngeal cancer || ||	TRUE	igd	3	180623255	0.0135	1.23e-09	77096	ieu-b-42	schizophrenia || id:ieu-b-42	TRUE	reported	igd	2	TRUE	0.000480634	37.0718
rs35225200	C	A	C	A	0.144795	-0.147	0.087	0.101	FALSE	FALSE	FALSE	ieu-b-90	4	103146888	0.079	4671	0.0598798	Oral cavity and pharyngeal cancer || id:ieu-b-90	Oral cavity and pharyngeal cancer	Oral cavity and pharyngeal cancer || ||	TRUE	igd	4	103146888	0.0203	9.56e-13	77096	ieu-b-42	schizophrenia || id:ieu-b-42	TRUE	reported	igd	2	TRUE	0.000659473	50.8749
rs35324223	G	A	G	A	0.091995	-0.002	0.181	0.173	FALSE	FALSE	FALSE	ieu-b-90	11	46402852	0.058	4671	0.973156	Oral cavity and pharyngeal cancer || id:ieu-b-90	Oral cavity and pharyngeal cancer	Oral cavity and pharyngeal cancer || ||	TRUE	igd	11	46402852	0.0145	2.04e-10	77096	ieu-b-42	schizophrenia || id:ieu-b-42	TRUE	reported	igd	2	TRUE	0.000521836	40.2514
rs35998080	T	G	T	G	0.069004	0.038	0.45	0.437	FALSE	FALSE	FALSE	ieu-b-90	1	73278615	0.044	4671	0.383176	Oral cavity and pharyngeal cancer || id:ieu-b-90	Oral cavity and pharyngeal cancer	Oral cavity and pharyngeal cancer || ||	TRUE	igd	1	73278615	0.0112	6.95e-10	77096	ieu-b-42	schizophrenia || id:ieu-b-42	TRUE	reported	igd	2	TRUE	0.000492115	37.9578
rs36068923	G	A	G	A	0.083501	0.035	0.187	0.199	FALSE	FALSE	FALSE	ieu-b-90	8	111485761	0.054	4671	0.515025	Oral cavity and pharyngeal cancer || id:ieu-b-90	Oral cavity and pharyngeal cancer	Oral cavity and pharyngeal cancer || ||	TRUE	igd	8	111485761	0.0134	4.14e-10	77096	ieu-b-42	schizophrenia || id:ieu-b-42	TRUE	reported	igd	2	TRUE	0.000503412	38.8296
rs3798869	A	G	A	G	-0.066802	0.042	0.464	0.406	FALSE	FALSE	FALSE	ieu-b-90	6	84328660	0.044	4671	0.339242	Oral cavity and pharyngeal cancer || id:ieu-b-90	Oral cavity and pharyngeal cancer	Oral cavity and pharyngeal cancer || ||	TRUE	igd	6	84328660	0.011	1.09e-09	77096	ieu-b-42	schizophrenia || id:ieu-b-42	TRUE	reported	igd	2	TRUE	0.000478139	36.8793
rs3849046	T	C	T	C	0.062496	0.003	0.508	0.542	FALSE	FALSE	FALSE	ieu-b-90	5	137851192	0.043	4671	0.93682	Oral cavity and pharyngeal cancer || id:ieu-b-90	Oral cavity and pharyngeal cancer	Oral cavity and pharyngeal cancer || ||	TRUE	igd	5	137851192	0.0109	1.04e-08	77096	ieu-b-42	schizophrenia || id:ieu-b-42	TRUE	reported	igd	2	TRUE	0.000426221	32.8731
rs4129585	C	A	C	A	-0.079301	-0.052	0.558	0.569	FALSE	FALSE	FALSE	ieu-b-90	8	143312933	0.045	4671	0.239584	Oral cavity and pharyngeal cancer || id:ieu-b-90	Oral cavity and pharyngeal cancer	Oral cavity and pharyngeal cancer || ||	TRUE	igd	8	143312933	0.0109	3.61e-13	77096	ieu-b-42	schizophrenia || id:ieu-b-42	TRUE	reported	igd	2	TRUE	0.000686079	52.9289
rs4391122	G	A	G	A	0.078005	0.111	0.462	0.466	FALSE	FALSE	FALSE	ieu-b-90	5	60642595	0.044	4671	0.0115149	Oral cavity and pharyngeal cancer || id:ieu-b-90	Oral cavity and pharyngeal cancer	Oral cavity and pharyngeal cancer || ||	TRUE	igd	5	60598543	0.0109	8.9e-13	77096	ieu-b-42	schizophrenia || id:ieu-b-42	TRUE	reported	igd	2	TRUE	0.000663853	51.213
rs4523957	T	G	T	G	0.069703	0.014	0.603	0.638	FALSE	FALSE	FALSE	ieu-b-90	17	2208899	0.046	4671	0.759298	Oral cavity and pharyngeal cancer || id:ieu-b-90	Oral cavity and pharyngeal cancer	Oral cavity and pharyngeal cancer || ||	TRUE	igd	17	2208899	0.0115	1.4e-09	77096	ieu-b-42	schizophrenia || id:ieu-b-42	TRUE	reported	igd	2	TRUE	0.000476287	36.7363
rs4648845	T	C	T	C	0.067201	0.094	0.479	0.492	FALSE	FALSE	FALSE	ieu-b-90	1	2390588	0.044	4671	0.0316002	Oral cavity and pharyngeal cancer || id:ieu-b-90	Oral cavity and pharyngeal cancer	Oral cavity and pharyngeal cancer || ||	TRUE	igd	1	2387101	0.0119	1.74e-08	77096	ieu-b-42	schizophrenia || id:ieu-b-42	TRUE	reported	igd	2	TRUE	0.000413472	31.8894
rs4702	A	G	A	G	-0.080505	0.018	0.574	0.547	FALSE	FALSE	FALSE	ieu-b-90	15	91426560	0.044	4670	0.6783	Oral cavity and pharyngeal cancer || id:ieu-b-90	Oral cavity and pharyngeal cancer	Oral cavity and pharyngeal cancer || ||	TRUE	igd	15	91426560	0.0115	2.62e-12	77096	ieu-b-42	schizophrenia || id:ieu-b-42	TRUE	reported	igd	2	TRUE	0.000635246	49.0048
rs4766428	T	C	T	C	0.069395	0.047	0.459	0.44	FALSE	FALSE	FALSE	ieu-b-90	12	110723245	0.047	4671	0.31715	Oral cavity and pharyngeal cancer || id:ieu-b-90	Oral cavity and pharyngeal cancer	Oral cavity and pharyngeal cancer || ||	TRUE	igd	12	110723245	0.0112	6.12e-10	77096	ieu-b-42	schizophrenia || id:ieu-b-42	TRUE	reported	igd	2	TRUE	0.000497705	38.3892
rs55775495	T	C	T	C	-0.068996	0.058	0.701	0.671	FALSE	FALSE	FALSE	ieu-b-90	2	198245965	0.047	4671	0.212477	Oral cavity and pharyngeal cancer || id:ieu-b-90	Oral cavity and pharyngeal cancer	Oral cavity and pharyngeal cancer || ||	TRUE	igd	2	198245965	0.0114	1.56e-09	77096	ieu-b-42	schizophrenia || id:ieu-b-42	TRUE	reported	igd	2	TRUE	0.000474898	36.6292
rs58120505	C	T	C	T	-0.082197	-0.071	0.412	0.439	FALSE	FALSE	FALSE	ieu-b-90	7	2029867	0.044	4671	0.104389	Oral cavity and pharyngeal cancer || id:ieu-b-90	Oral cavity and pharyngeal cancer	Oral cavity and pharyngeal cancer || ||	TRUE	igd	7	2029867	0.0111	1.26e-13	77096	ieu-b-42	schizophrenia || id:ieu-b-42	TRUE	reported	igd	2	TRUE	0.000710764	54.8346
rs5995756	C	T	C	T	-0.072497	-0.03	0.54	0.578	FALSE	FALSE	FALSE	ieu-b-90	22	40000313	0.044	4671	0.484608	Oral cavity and pharyngeal cancer || id:ieu-b-90	Oral cavity and pharyngeal cancer	Oral cavity and pharyngeal cancer || ||	TRUE	igd	22	40000313	0.0109	2.91e-11	77096	ieu-b-42	schizophrenia || id:ieu-b-42	TRUE	reported	igd	2	TRUE	0.000573464	44.236
rs6439649	T	G	T	G	0.070999	0.012	0.562	0.608	FALSE	FALSE	FALSE	ieu-b-90	3	136371691	0.045	4671	0.796199	Oral cavity and pharyngeal cancer || id:ieu-b-90	Oral cavity and pharyngeal cancer	Oral cavity and pharyngeal cancer || ||	TRUE	igd	3	136371691	0.0111	1.37e-10	77096	ieu-b-42	schizophrenia || id:ieu-b-42	TRUE	reported	igd	2	TRUE	0.000530391	40.9117
rs6704768	A	G	A	G	-0.0766	0.07	0.529	0.574	FALSE	FALSE	FALSE	ieu-b-90	2	233592501	0.045	4671	0.120456	Oral cavity and pharyngeal cancer || id:ieu-b-90	Oral cavity and pharyngeal cancer	Oral cavity and pharyngeal cancer || ||	TRUE	igd	2	233592501	0.0109	2.06e-12	77096	ieu-b-42	schizophrenia || id:ieu-b-42	TRUE	reported	igd	2	TRUE	0.000640169	49.3848
rs72986630	T	C	T	C	0.1459	-0.06	0.054	0.072	FALSE	FALSE	FALSE	ieu-b-90	19	11849736	0.097	4671	0.534641	Oral cavity and pharyngeal cancer || id:ieu-b-90	Oral cavity and pharyngeal cancer	Oral cavity and pharyngeal cancer || ||	TRUE	igd	19	11849736	0.0266	4.12e-08	77096	ieu-b-42	schizophrenia || id:ieu-b-42	TRUE	reported	igd	2	TRUE	0.000390073	30.084
rs73036062	A	G	A	G	-0.089104	-0.108	0.21	0.195	FALSE	FALSE	FALSE	ieu-b-90	11	133828187	0.059	4671	0.0664278	Oral cavity and pharyngeal cancer || id:ieu-b-90	Oral cavity and pharyngeal cancer	Oral cavity and pharyngeal cancer || ||	TRUE	igd	11	133828187	0.0135	3.68e-11	77096	ieu-b-42	schizophrenia || id:ieu-b-42	TRUE	reported	igd	2	TRUE	0.000564741	43.5628
rs73191547	T	A	T	A	0.066899	0.028	0.286	0.333	FALSE	TRUE	FALSE	ieu-b-90	8	10033425	0.045	4671	0.547884	Oral cavity and pharyngeal cancer || id:ieu-b-90	Oral cavity and pharyngeal cancer	Oral cavity and pharyngeal cancer || ||	TRUE	igd	8	10033425	0.0115	6.13e-09	77096	ieu-b-42	schizophrenia || id:ieu-b-42	TRUE	reported	igd	2	TRUE	0.000438754	33.8402
rs73229090	A	C	A	C	-0.0995	-0.01	0.121	0.114	FALSE	FALSE	FALSE	ieu-b-90	8	27442127	0.07	4671	0.88126	Oral cavity and pharyngeal cancer || id:ieu-b-90	Oral cavity and pharyngeal cancer	Oral cavity and pharyngeal cancer || ||	TRUE	igd	8	27442127	0.0177	1.95e-08	77096	ieu-b-42	schizophrenia || id:ieu-b-42	TRUE	reported	igd	2	TRUE	0.000409722	31.6001
rs75968099	T	C	T	C	0.080104	-0.068	0.351	0.36	FALSE	FALSE	FALSE	ieu-b-90	3	36871507	0.045	4671	0.124719	Oral cavity and pharyngeal cancer || id:ieu-b-90	Oral cavity and pharyngeal cancer	Oral cavity and pharyngeal cancer || ||	TRUE	igd	3	36858583	0.0114	2.31e-12	77096	ieu-b-42	schizophrenia || id:ieu-b-42	TRUE	reported	igd	2	TRUE	0.000640013	49.3728
rs7601312	G	A	G	A	0.058997	0.048	0.484	0.482	FALSE	FALSE	FALSE	ieu-b-90	2	229320093	0.043	4671	0.265574	Oral cavity and pharyngeal cancer || id:ieu-b-90	Oral cavity and pharyngeal cancer	Oral cavity and pharyngeal cancer || ||	TRUE	igd	2	229320093	0.0108	4.67e-08	77096	ieu-b-42	schizophrenia || id:ieu-b-42	TRUE	reported	igd	2	TRUE	0.000386912	29.8402
rs760648	A	G	A	G	0.075803	0.025	0.416	0.427	FALSE	FALSE	FALSE	ieu-b-90	22	42571028	0.045	4671	0.585987	Oral cavity and pharyngeal cancer || id:ieu-b-90	Oral cavity and pharyngeal cancer	Oral cavity and pharyngeal cancer || ||	TRUE	igd	22	42571028	0.0118	1.27e-10	77096	ieu-b-42	schizophrenia || id:ieu-b-42	TRUE	reported	igd	2	TRUE	0.000534989	41.2665
rs76355118	G	A	G	A	0.154399	-0.077	0.041	0.051	FALSE	FALSE	FALSE	ieu-b-90	2	149412005	0.116	4671	0.510195	Oral cavity and pharyngeal cancer || id:ieu-b-90	Oral cavity and pharyngeal cancer	Oral cavity and pharyngeal cancer || ||	TRUE	igd	2	149412005	0.0278	2.78e-08	77096	ieu-b-42	schizophrenia || id:ieu-b-42	TRUE	reported	igd	2	TRUE	0.000399939	30.8452
rs77149735	A	G	A	G	0.284502	-0.075	0.016	0.026	FALSE	FALSE	FALSE	ieu-b-90	1	243555105	0.199	4671	0.704984	Oral cavity and pharyngeal cancer || id:ieu-b-90	Oral cavity and pharyngeal cancer	Oral cavity and pharyngeal cancer || ||	TRUE	igd	1	243555105	0.0485	4.4e-09	77096	ieu-b-42	schizophrenia || id:ieu-b-42	TRUE	reported	igd	2	TRUE	0.00044613	34.4093
rs7801375	G	A	G	A	0.083001	0.035	0.847	0.847	FALSE	FALSE	FALSE	ieu-b-90	7	131567263	0.061	4671	0.564698	Oral cavity and pharyngeal cancer || id:ieu-b-90	Oral cavity and pharyngeal cancer	Oral cavity and pharyngeal cancer || ||	TRUE	igd	7	131567263	0.015	2.88e-08	77096	ieu-b-42	schizophrenia || id:ieu-b-42	TRUE	reported	igd	2	TRUE	0.00039699	30.6177
rs7819570	T	G	T	G	0.076498	0.042	0.207	0.182	FALSE	FALSE	FALSE	ieu-b-90	8	89596484	0.056	4671	0.457003	Oral cavity and pharyngeal cancer || id:ieu-b-90	Oral cavity and pharyngeal cancer	Oral cavity and pharyngeal cancer || ||	TRUE	igd	8	89588626	0.014	4.47e-08	77096	ieu-b-42	schizophrenia || id:ieu-b-42	TRUE	reported	igd	2	TRUE	0.000387119	29.8561
rs783540	G	A	G	A	0.059899	0.089	0.43	0.374	FALSE	FALSE	FALSE	ieu-b-90	15	83254708	0.045	4671	0.0463298	Oral cavity and pharyngeal cancer || id:ieu-b-90	Oral cavity and pharyngeal cancer	Oral cavity and pharyngeal cancer || ||	TRUE	igd	15	83254708	0.011	4.77e-08	77096	ieu-b-42	schizophrenia || id:ieu-b-42	TRUE	reported	igd	2	TRUE	0.000384463	29.6512
rs7893279	G	T	G	T	-0.1124	-0.093	0.125	0.109	FALSE	FALSE	FALSE	ieu-b-90	10	18745105	0.07	4671	0.17992	Oral cavity and pharyngeal cancer || id:ieu-b-90	Oral cavity and pharyngeal cancer	Oral cavity and pharyngeal cancer || ||	TRUE	igd	10	18745105	0.0175	1.24e-10	77096	ieu-b-42	schizophrenia || id:ieu-b-42	TRUE	reported	igd	2	TRUE	0.000534801	41.252
rs8055219	A	G	A	G	0.076998	-0.02	0.259	0.239	FALSE	FALSE	FALSE	ieu-b-90	16	13753384	0.051	4671	0.694967	Oral cavity and pharyngeal cancer || id:ieu-b-90	Oral cavity and pharyngeal cancer	Oral cavity and pharyngeal cancer || ||	TRUE	igd	16	13753384	0.0127	1.45e-09	77096	ieu-b-42	schizophrenia || id:ieu-b-42	TRUE	reported	igd	2	TRUE	0.000476555	36.757
rs832190	T	C	T	C	-0.069897	0.129	0.613	0.608	FALSE	FALSE	FALSE	ieu-b-90	3	63842629	0.045	4671	0.00369097	Oral cavity and pharyngeal cancer || id:ieu-b-90	Oral cavity and pharyngeal cancer	Oral cavity and pharyngeal cancer || ||	TRUE	igd	3	63842629	0.0113	5.73e-10	77096	ieu-b-42	schizophrenia || id:ieu-b-42	TRUE	reported	igd	2	TRUE	0.000496036	38.2603
rs9636107	G	A	G	A	0.079595	0.084	0.497	0.483	FALSE	FALSE	FALSE	ieu-b-90	18	53200117	0.043	4671	0.0519948	Oral cavity and pharyngeal cancer || id:ieu-b-90	Oral cavity and pharyngeal cancer	Oral cavity and pharyngeal cancer || ||	TRUE	igd	18	53200117	0.0108	2.17e-13	77096	ieu-b-42	schizophrenia || id:ieu-b-42	TRUE	reported	igd	2	TRUE	0.000704022	54.3141
rs1024582	G	A	G	A	-0.098904	0.000211423	0.66	0.653102	FALSE	FALSE	FALSE	ukb-b-16713	12	2402246	0.000108551	463010	0.051	Diagnoses - secondary ICD10: C78.7 Secondary malignant neoplasm of liver || id:ukb-b-16713	Diagnoses - secondary ICD10: C78.7 Secondary malignant neoplasm of liver	Diagnoses - secondary ICD10: C78.7 Secondary malignant neoplasm of liver || ||	TRUE	igd	12	2402246	0.0115	6.27e-18	77096	ieu-b-42	schizophrenia || id:ieu-b-42	TRUE	reported	igd	2	TRUE	0.000958481	73.9641
rs10791097	G	T	G	T	-0.0766	7.56e-05	0.52	0.526493	FALSE	FALSE	FALSE	ukb-b-16713	11	130718630	0.00010339	463010	0.46	Diagnoses - secondary ICD10: C78.7 Secondary malignant neoplasm of liver || id:ukb-b-16713	Diagnoses - secondary ICD10: C78.7 Secondary malignant neoplasm of liver	Diagnoses - secondary ICD10: C78.7 Secondary malignant neoplasm of liver || ||	TRUE	igd	11	130718630	0.0109	2.05e-12	77096	ieu-b-42	schizophrenia || id:ieu-b-42	TRUE	reported	igd	2	TRUE	0.000640169	49.3848
rs11027857	A	G	A	G	0.063998	5.31e-05	0.587	0.515522	FALSE	FALSE	FALSE	ukb-b-16713	11	24403620	0.000102957	463010	0.61	Diagnoses - secondary ICD10: C78.7 Secondary malignant neoplasm of liver || id:ukb-b-16713	Diagnoses - secondary ICD10: C78.7 Secondary malignant neoplasm of liver	Diagnoses - secondary ICD10: C78.7 Secondary malignant neoplasm of liver || ||	TRUE	igd	11	24403620	0.0109	3.67e-09	77096	ieu-b-42	schizophrenia || id:ieu-b-42	TRUE	reported	igd	2	TRUE	0.000446945	34.4722
rs11139497	A	T	A	T	0.0656	0.00014301	0.336	0.327524	FALSE	TRUE	FALSE	ukb-b-16713	9	84739941	0.00010976	463010	0.19	Diagnoses - secondary ICD10: C78.7 Secondary malignant neoplasm of liver || id:ukb-b-16713	Diagnoses - secondary ICD10: C78.7 Secondary malignant neoplasm of liver	Diagnoses - secondary ICD10: C78.7 Secondary malignant neoplasm of liver || ||	TRUE	igd	9	84739941	0.0118	2.65e-08	77096	ieu-b-42	schizophrenia || id:ieu-b-42	TRUE	reported	igd	2	TRUE	0.000400717	30.9053
rs11191419	A	T	A	T	-0.101601	8.07e-05	0.334	0.329105	FALSE	TRUE	FALSE	ukb-b-16713	10	104612335	0.000109565	463010	0.46	Diagnoses - secondary ICD10: C78.7 Secondary malignant neoplasm of liver || id:ukb-b-16713	Diagnoses - secondary ICD10: C78.7 Secondary malignant neoplasm of liver	Diagnoses - secondary ICD10: C78.7 Secondary malignant neoplasm of liver || ||	TRUE	igd	10	104612335	0.0118	6.69e-18	77096	ieu-b-42	schizophrenia || id:ieu-b-42	TRUE	reported	igd	2	TRUE	0.000960689	74.1346
rs11210892	A	G	A	G	-0.067797	-1.37e-05	0.652	0.67404	FALSE	FALSE	FALSE	ukb-b-16713	1	44100084	0.000109775	463010	0.9	Diagnoses - secondary ICD10: C78.7 Secondary malignant neoplasm of liver || id:ukb-b-16713	Diagnoses - secondary ICD10: C78.7 Secondary malignant neoplasm of liver	Diagnoses - secondary ICD10: C78.7 Secondary malignant neoplasm of liver || ||	TRUE	igd	1	44100084	0.0115	3.42e-09	77096	ieu-b-42	schizophrenia || id:ieu-b-42	TRUE	reported	igd	2	TRUE	0.000450607	34.7547
rs11658257	C	G	C	G	-0.066204	1.64e-05	0.573	0.691347	FALSE	TRUE	TRUE	ukb-b-16713	17	17961349	0.000111414	463010	0.88	Diagnoses - secondary ICD10: C78.7 Secondary malignant neoplasm of liver || id:ukb-b-16713	Diagnoses - secondary ICD10: C78.7 Secondary malignant neoplasm of liver	Diagnoses - secondary ICD10: C78.7 Secondary malignant neoplasm of liver || ||	TRUE	igd	17	17956459	0.0115	8.34e-09	77096	ieu-b-42	schizophrenia || id:ieu-b-42	TRUE	reported	igd	2	FALSE	0.000429689	33.1407
rs11682175	C	T	C	T	0.073496	-2.4e-05	0.439	0.473316	FALSE	FALSE	FALSE	ukb-b-16713	2	57987593	0.000103436	463010	0.82	Diagnoses - secondary ICD10: C78.7 Secondary malignant neoplasm of liver || id:ukb-b-16713	Diagnoses - secondary ICD10: C78.7 Secondary malignant neoplasm of liver	Diagnoses - secondary ICD10: C78.7 Secondary malignant neoplasm of liver || ||	TRUE	igd	2	57987593	0.0109	1.58e-11	77096	ieu-b-42	schizophrenia || id:ieu-b-42	TRUE	reported	igd	2	TRUE	0.000589368	45.4635
rs11693094	T	C	T	C	-0.073603	7.69e-05	0.429	0.464626	FALSE	FALSE	FALSE	ukb-b-16713	2	185601420	0.000103452	463010	0.46	Diagnoses - secondary ICD10: C78.7 Secondary malignant neoplasm of liver || id:ukb-b-16713	Diagnoses - secondary ICD10: C78.7 Secondary malignant neoplasm of liver	Diagnoses - secondary ICD10: C78.7 Secondary malignant neoplasm of liver || ||	TRUE	igd	2	185601420	0.011	2.17e-11	77096	ieu-b-42	schizophrenia || id:ieu-b-42	TRUE	reported	igd	2	TRUE	0.000580392	44.7708
rs11740474	T	A	T	A	0.062695	3.17e-05	0.412	0.417157	FALSE	TRUE	FALSE	ukb-b-16713	5	153680747	0.000105076	463010	0.760001	Diagnoses - secondary ICD10: C78.7 Secondary malignant neoplasm of liver || id:ukb-b-16713	Diagnoses - secondary ICD10: C78.7 Secondary malignant neoplasm of liver	Diagnoses - secondary ICD10: C78.7 Secondary malignant neoplasm of liver || ||	TRUE	igd	5	153680747	0.0112	2e-08	77096	ieu-b-42	schizophrenia || id:ieu-b-42	TRUE	reported	igd	2	TRUE	0.000406276	31.3342
rs12691307	G	A	G	A	-0.071902	0.000148497	0.478	0.558565	FALSE	FALSE	FALSE	ukb-b-16713	16	29939877	0.00010365	463010	0.15	Diagnoses - secondary ICD10: C78.7 Secondary malignant neoplasm of liver || id:ukb-b-16713	Diagnoses - secondary ICD10: C78.7 Secondary malignant neoplasm of liver	Diagnoses - secondary ICD10: C78.7 Secondary malignant neoplasm of liver || ||	TRUE	igd	16	29939877	0.0113	2.03e-10	77096	ieu-b-42	schizophrenia || id:ieu-b-42	TRUE	reported	igd	2	TRUE	0.000524886	40.4868
rs12887734	T	G	T	G	0.088304	1.32e-05	0.273	0.308611	FALSE	FALSE	FALSE	ukb-b-16713	14	104061284	0.000111778	463010	0.91	Diagnoses - secondary ICD10: C78.7 Secondary malignant neoplasm of liver || id:ukb-b-16713	Diagnoses - secondary ICD10: C78.7 Secondary malignant neoplasm of liver	Diagnoses - secondary ICD10: C78.7 Secondary malignant neoplasm of liver || ||	TRUE	igd	14	104046834	0.0121	3.72e-13	77096	ieu-b-42	schizophrenia || id:ieu-b-42	TRUE	reported	igd	2	TRUE	0.000690332	53.2573
rs12932476	G	C	G	C	-0.059702	9.57e-05	0.512	0.517955	FALSE	TRUE	TRUE	ukb-b-16713	16	63709630	0.000103572	463010	0.36	Diagnoses - secondary ICD10: C78.7 Secondary malignant neoplasm of liver || id:ukb-b-16713	Diagnoses - secondary ICD10: C78.7 Secondary malignant neoplasm of liver	Diagnoses - secondary ICD10: C78.7 Secondary malignant neoplasm of liver || ||	TRUE	igd	16	63709630	0.0109	4.62e-08	77096	ieu-b-42	schizophrenia || id:ieu-b-42	TRUE	reported	igd	2	FALSE	0.000388977	29.9995
rs13240464	C	T	C	T	-0.080704	9.19e-05	0.379	0.332857	FALSE	FALSE	FALSE	ukb-b-16713	7	110898915	0.000109275	463010	0.4	Diagnoses - secondary ICD10: C78.7 Secondary malignant neoplasm of liver || id:ukb-b-16713	Diagnoses - secondary ICD10: C78.7 Secondary malignant neoplasm of liver	Diagnoses - secondary ICD10: C78.7 Secondary malignant neoplasm of liver || ||	TRUE	igd	7	110898915	0.0116	3.12e-12	77096	ieu-b-42	schizophrenia || id:ieu-b-42	TRUE	reported	igd	2	TRUE	0.000627436	48.402
rs13261481	G	T	G	T	-0.062402	6.32e-05	0.591	0.553564	FALSE	FALSE	FALSE	ukb-b-16713	8	60706091	0.000103639	463010	0.54	Diagnoses - secondary ICD10: C78.7 Secondary malignant neoplasm of liver || id:ukb-b-16713	Diagnoses - secondary ICD10: C78.7 Secondary malignant neoplasm of liver	Diagnoses - secondary ICD10: C78.7 Secondary malignant neoplasm of liver || ||	TRUE	igd	8	60701801	0.011	1.66e-08	77096	ieu-b-42	schizophrenia || id:ieu-b-42	TRUE	reported	igd	2	TRUE	0.000417252	32.1811
rs1339227	T	C	T	C	-0.063302	-0.000159106	0.355	0.371586	FALSE	FALSE	FALSE	ukb-b-16713	6	73157926	0.000107909	463010	0.14	Diagnoses - secondary ICD10: C78.7 Secondary malignant neoplasm of liver || id:ukb-b-16713	Diagnoses - secondary ICD10: C78.7 Secondary malignant neoplasm of liver	Diagnoses - secondary ICD10: C78.7 Secondary malignant neoplasm of liver || ||	TRUE	igd	6	73155701	0.0114	3.06e-08	77096	ieu-b-42	schizophrenia || id:ieu-b-42	TRUE	reported	igd	2	TRUE	0.000399779	30.8329
rs1498232	C	T	C	T	-0.072004	-6.5e-05	0.697	0.691583	FALSE	FALSE	FALSE	ukb-b-16713	1	30433951	0.000111909	463010	0.56	Diagnoses - secondary ICD10: C78.7 Secondary malignant neoplasm of liver || id:ukb-b-16713	Diagnoses - secondary ICD10: C78.7 Secondary malignant neoplasm of liver	Diagnoses - secondary ICD10: C78.7 Secondary malignant neoplasm of liver || ||	TRUE	igd	1	30433951	0.0118	1.21e-09	77096	ieu-b-42	schizophrenia || id:ieu-b-42	TRUE	reported	igd	2	TRUE	0.000482734	37.2339
rs1509378	G	A	G	A	-0.0692	-4.82e-05	0.646	0.675525	FALSE	FALSE	FALSE	ukb-b-16713	2	22754466	0.000109925	463010	0.66	Diagnoses - secondary ICD10: C78.7 Secondary malignant neoplasm of liver || id:ukb-b-16713	Diagnoses - secondary ICD10: C78.7 Secondary malignant neoplasm of liver	Diagnoses - secondary ICD10: C78.7 Secondary malignant neoplasm of liver || ||	TRUE	igd	2	22754466	0.0119	5.39e-09	77096	ieu-b-42	schizophrenia || id:ieu-b-42	TRUE	reported	igd	2	TRUE	0.000438426	33.8148
rs17108967	C	T	C	T	0.065296	-7.17e-05	0.343	0.337579	FALSE	FALSE	FALSE	ukb-b-16713	14	71542168	0.000108931	463010	0.51	Diagnoses - secondary ICD10: C78.7 Secondary malignant neoplasm of liver || id:ukb-b-16713	Diagnoses - secondary ICD10: C78.7 Secondary malignant neoplasm of liver	Diagnoses - secondary ICD10: C78.7 Secondary malignant neoplasm of liver || ||	TRUE	igd	14	71542168	0.0115	1.21e-08	77096	ieu-b-42	schizophrenia || id:ieu-b-42	TRUE	reported	igd	2	TRUE	0.000417988	32.2379
rs2103655	A	G	A	G	0.0766	-5.99e-05	0.664	0.675845	FALSE	FALSE	FALSE	ukb-b-16713	20	37453194	0.00011	463010	0.59	Diagnoses - secondary ICD10: C78.7 Secondary malignant neoplasm of liver || id:ukb-b-16713	Diagnoses - secondary ICD10: C78.7 Secondary malignant neoplasm of liver	Diagnoses - secondary ICD10: C78.7 Secondary malignant neoplasm of liver || ||	TRUE	igd	20	37425958	0.0119	1.24e-10	77096	ieu-b-42	schizophrenia || id:ieu-b-42	TRUE	reported	igd	2	TRUE	0.000537154	41.4336
rs215411	A	T	A	T	0.0692	-3.13e-05	0.327	0.325152	FALSE	TRUE	FALSE	ukb-b-16713	4	23423603	0.000110371	463010	0.780001	Diagnoses - secondary ICD10: C78.7 Secondary malignant neoplasm of liver || id:ukb-b-16713	Diagnoses - secondary ICD10: C78.7 Secondary malignant neoplasm of liver	Diagnoses - secondary ICD10: C78.7 Secondary malignant neoplasm of liver || ||	TRUE	igd	4	23423603	0.0115	1.68e-09	77096	ieu-b-42	schizophrenia || id:ieu-b-42	TRUE	reported	igd	2	TRUE	0.000469441	36.2081
rs2414718	A	G	A	G	0.069797	2.84e-05	0.617	0.592427	FALSE	FALSE	FALSE	ukb-b-16713	15	61863133	0.00010488	463010	0.79	Diagnoses - secondary ICD10: C78.7 Secondary malignant neoplasm of liver || id:ukb-b-16713	Diagnoses - secondary ICD10: C78.7 Secondary malignant neoplasm of liver	Diagnoses - secondary ICD10: C78.7 Secondary malignant neoplasm of liver || ||	TRUE	igd	15	61863133	0.011	1.98e-10	77096	ieu-b-42	schizophrenia || id:ieu-b-42	TRUE	reported	igd	2	TRUE	0.000521951	40.2603
rs2514218	T	C	T	C	-0.072205	-0.000146456	0.327	0.356121	FALSE	FALSE	FALSE	ukb-b-16713	11	113392994	0.000107954	463010	0.17	Diagnoses - secondary ICD10: C78.7 Secondary malignant neoplasm of liver || id:ukb-b-16713	Diagnoses - secondary ICD10: C78.7 Secondary malignant neoplasm of liver	Diagnoses - secondary ICD10: C78.7 Secondary malignant neoplasm of liver || ||	TRUE	igd	11	113392994	0.0116	4.64e-10	77096	ieu-b-42	schizophrenia || id:ieu-b-42	TRUE	reported	igd	2	TRUE	0.000502306	38.7443
rs2535627	C	T	C	T	-0.070403	-0.00010623	0.503	0.463422	FALSE	FALSE	FALSE	ukb-b-16713	3	52845105	0.000103599	463010	0.31	Diagnoses - secondary ICD10: C78.7 Secondary malignant neoplasm of liver || id:ukb-b-16713	Diagnoses - secondary ICD10: C78.7 Secondary malignant neoplasm of liver	Diagnoses - secondary ICD10: C78.7 Secondary malignant neoplasm of liver || ||	TRUE	igd	3	52845105	0.0109	1.17e-10	77096	ieu-b-42	schizophrenia || id:ieu-b-42	TRUE	reported	igd	2	TRUE	0.000540832	41.7175
rs2693698	G	A	G	A	0.061705	3.39e-05	0.551	0.542031	FALSE	FALSE	FALSE	ukb-b-16713	14	99719219	0.000103975	463010	0.74	Diagnoses - secondary ICD10: C78.7 Secondary malignant neoplasm of liver || id:ukb-b-16713	Diagnoses - secondary ICD10: C78.7 Secondary malignant neoplasm of liver	Diagnoses - secondary ICD10: C78.7 Secondary malignant neoplasm of liver || ||	TRUE	igd	14	99719219	0.0111	2.99e-08	77096	ieu-b-42	schizophrenia || id:ieu-b-42	TRUE	reported	igd	2	TRUE	0.000400672	30.9018
rs2905432	A	G	A	G	-0.066001	-7.38e-05	0.671	0.648101	FALSE	FALSE	FALSE	ukb-b-16713	19	19484295	0.000107898	463010	0.49	Diagnoses - secondary ICD10: C78.7 Secondary malignant neoplasm of liver || id:ukb-b-16713	Diagnoses - secondary ICD10: C78.7 Secondary malignant neoplasm of liver	Diagnoses - secondary ICD10: C78.7 Secondary malignant neoplasm of liver || ||	TRUE	igd	19	19484295	0.0114	7.51e-09	77096	ieu-b-42	schizophrenia || id:ieu-b-42	TRUE	reported	igd	2	TRUE	0.000434581	33.5182
rs2909457	A	G	A	G	-0.059697	-0.000101632	0.574	0.535088	FALSE	FALSE	FALSE	ukb-b-16713	2	162845855	0.000103338	463010	0.33	Diagnoses - secondary ICD10: C78.7 Secondary malignant neoplasm of liver || id:ukb-b-16713	Diagnoses - secondary ICD10: C78.7 Secondary malignant neoplasm of liver	Diagnoses - secondary ICD10: C78.7 Secondary malignant neoplasm of liver || ||	TRUE	igd	2	162845855	0.0109	4.25e-08	77096	ieu-b-42	schizophrenia || id:ieu-b-42	TRUE	reported	igd	2	TRUE	0.000388912	29.9944
rs301797	A	C	A	C	0.066097	-5.3e-05	0.322	0.339848	FALSE	FALSE	FALSE	ukb-b-16713	1	8487323	0.000108814	463010	0.630001	Diagnoses - secondary ICD10: C78.7 Secondary malignant neoplasm of liver || id:ukb-b-16713	Diagnoses - secondary ICD10: C78.7 Secondary malignant neoplasm of liver	Diagnoses - secondary ICD10: C78.7 Secondary malignant neoplasm of liver || ||	TRUE	igd	1	8487323	0.0116	1.2e-08	77096	ieu-b-42	schizophrenia || id:ieu-b-42	TRUE	reported	igd	2	TRUE	0.000420952	32.4666
rs35998080	T	G	T	G	0.069004	8.14e-06	0.45	0.426145	FALSE	FALSE	FALSE	ukb-b-16713	1	73278615	0.000105169	463010	0.94	Diagnoses - secondary ICD10: C78.7 Secondary malignant neoplasm of liver || id:ukb-b-16713	Diagnoses - secondary ICD10: C78.7 Secondary malignant neoplasm of liver	Diagnoses - secondary ICD10: C78.7 Secondary malignant neoplasm of liver || ||	TRUE	igd	1	73278615	0.0112	6.95e-10	77096	ieu-b-42	schizophrenia || id:ieu-b-42	TRUE	reported	igd	2	TRUE	0.000492115	37.9578
rs3798869	A	G	A	G	-0.066802	0.000302566	0.464	0.437297	FALSE	FALSE	FALSE	ukb-b-16713	6	84328660	0.000103832	463010	0.00359998	Diagnoses - secondary ICD10: C78.7 Secondary malignant neoplasm of liver || id:ukb-b-16713	Diagnoses - secondary ICD10: C78.7 Secondary malignant neoplasm of liver	Diagnoses - secondary ICD10: C78.7 Secondary malignant neoplasm of liver || ||	TRUE	igd	6	84328660	0.011	1.09e-09	77096	ieu-b-42	schizophrenia || id:ieu-b-42	TRUE	reported	igd	2	TRUE	0.000478139	36.8793
rs3849046	T	C	T	C	0.062496	4.95e-05	0.508	0.53292	FALSE	FALSE	FALSE	ukb-b-16713	5	137851192	0.000104778	463010	0.64	Diagnoses - secondary ICD10: C78.7 Secondary malignant neoplasm of liver || id:ukb-b-16713	Diagnoses - secondary ICD10: C78.7 Secondary malignant neoplasm of liver	Diagnoses - secondary ICD10: C78.7 Secondary malignant neoplasm of liver || ||	TRUE	igd	5	137851192	0.0109	1.04e-08	77096	ieu-b-42	schizophrenia || id:ieu-b-42	TRUE	reported	igd	2	TRUE	0.000426221	32.8731
rs4129585	C	A	C	A	-0.079301	0.000139966	0.558	0.560837	FALSE	FALSE	FALSE	ukb-b-16713	8	143312933	0.000103722	463010	0.18	Diagnoses - secondary ICD10: C78.7 Secondary malignant neoplasm of liver || id:ukb-b-16713	Diagnoses - secondary ICD10: C78.7 Secondary malignant neoplasm of liver	Diagnoses - secondary ICD10: C78.7 Secondary malignant neoplasm of liver || ||	TRUE	igd	8	143312933	0.0109	3.61e-13	77096	ieu-b-42	schizophrenia || id:ieu-b-42	TRUE	reported	igd	2	TRUE	0.000686079	52.9289
rs4391122	G	A	G	A	0.078005	-0.00015298	0.462	0.501213	FALSE	FALSE	FALSE	ukb-b-16713	5	60598543	0.000103525	463010	0.14	Diagnoses - secondary ICD10: C78.7 Secondary malignant neoplasm of liver || id:ukb-b-16713	Diagnoses - secondary ICD10: C78.7 Secondary malignant neoplasm of liver	Diagnoses - secondary ICD10: C78.7 Secondary malignant neoplasm of liver || ||	TRUE	igd	5	60598543	0.0109	8.9e-13	77096	ieu-b-42	schizophrenia || id:ieu-b-42	TRUE	reported	igd	2	TRUE	0.000663853	51.213
rs4523957	T	G	T	G	0.069703	9.33e-05	0.603	0.640921	FALSE	FALSE	FALSE	ukb-b-16713	17	2208899	0.000107744	463010	0.39	Diagnoses - secondary ICD10: C78.7 Secondary malignant neoplasm of liver || id:ukb-b-16713	Diagnoses - secondary ICD10: C78.7 Secondary malignant neoplasm of liver	Diagnoses - secondary ICD10: C78.7 Secondary malignant neoplasm of liver || ||	TRUE	igd	17	2208899	0.0115	1.4e-09	77096	ieu-b-42	schizophrenia || id:ieu-b-42	TRUE	reported	igd	2	TRUE	0.000476287	36.7363
rs4648845	T	C	T	C	0.067201	-7.67e-05	0.479	0.484314	FALSE	FALSE	FALSE	ukb-b-16713	1	2387101	0.000103586	463010	0.46	Diagnoses - secondary ICD10: C78.7 Secondary malignant neoplasm of liver || id:ukb-b-16713	Diagnoses - secondary ICD10: C78.7 Secondary malignant neoplasm of liver	Diagnoses - secondary ICD10: C78.7 Secondary malignant neoplasm of liver || ||	TRUE	igd	1	2387101	0.0119	1.74e-08	77096	ieu-b-42	schizophrenia || id:ieu-b-42	TRUE	reported	igd	2	TRUE	0.000413472	31.8894
rs4702	A	G	A	G	-0.080505	-6.51e-05	0.574	0.556445	FALSE	FALSE	FALSE	ukb-b-16713	15	91426560	0.000103632	463010	0.53	Diagnoses - secondary ICD10: C78.7 Secondary malignant neoplasm of liver || id:ukb-b-16713	Diagnoses - secondary ICD10: C78.7 Secondary malignant neoplasm of liver	Diagnoses - secondary ICD10: C78.7 Secondary malignant neoplasm of liver || ||	TRUE	igd	15	91426560	0.0115	2.62e-12	77096	ieu-b-42	schizophrenia || id:ieu-b-42	TRUE	reported	igd	2	TRUE	0.000635246	49.0048
rs4766428	T	C	T	C	0.069395	-8.34e-05	0.459	0.431578	FALSE	FALSE	FALSE	ukb-b-16713	12	110723245	0.000104504	463010	0.43	Diagnoses - secondary ICD10: C78.7 Secondary malignant neoplasm of liver || id:ukb-b-16713	Diagnoses - secondary ICD10: C78.7 Secondary malignant neoplasm of liver	Diagnoses - secondary ICD10: C78.7 Secondary malignant neoplasm of liver || ||	TRUE	igd	12	110723245	0.0112	6.12e-10	77096	ieu-b-42	schizophrenia || id:ieu-b-42	TRUE	reported	igd	2	TRUE	0.000497705	38.3892
rs55775495	T	C	T	C	-0.068996	4.43e-05	0.701	0.646736	FALSE	FALSE	FALSE	ukb-b-16713	2	198245965	0.000107902	463010	0.68	Diagnoses - secondary ICD10: C78.7 Secondary malignant neoplasm of liver || id:ukb-b-16713	Diagnoses - secondary ICD10: C78.7 Secondary malignant neoplasm of liver	Diagnoses - secondary ICD10: C78.7 Secondary malignant neoplasm of liver || ||	TRUE	igd	2	198245965	0.0114	1.56e-09	77096	ieu-b-42	schizophrenia || id:ieu-b-42	TRUE	reported	igd	2	TRUE	0.000474898	36.6292
rs58120505	C	T	C	T	-0.082197	0.000239358	0.412	0.434025	FALSE	FALSE	FALSE	ukb-b-16713	7	2029867	0.000103817	463010	0.021	Diagnoses - secondary ICD10: C78.7 Secondary malignant neoplasm of liver || id:ukb-b-16713	Diagnoses - secondary ICD10: C78.7 Secondary malignant neoplasm of liver	Diagnoses - secondary ICD10: C78.7 Secondary malignant neoplasm of liver || ||	TRUE	igd	7	2029867	0.0111	1.26e-13	77096	ieu-b-42	schizophrenia || id:ieu-b-42	TRUE	reported	igd	2	TRUE	0.000710764	54.8346
rs5995756	C	T	C	T	-0.072497	-0.000169707	0.54	0.573317	FALSE	FALSE	FALSE	ukb-b-16713	22	40000313	0.000104315	463010	0.1	Diagnoses - secondary ICD10: C78.7 Secondary malignant neoplasm of liver || id:ukb-b-16713	Diagnoses - secondary ICD10: C78.7 Secondary malignant neoplasm of liver	Diagnoses - secondary ICD10: C78.7 Secondary malignant neoplasm of liver || ||	TRUE	igd	22	40000313	0.0109	2.91e-11	77096	ieu-b-42	schizophrenia || id:ieu-b-42	TRUE	reported	igd	2	TRUE	0.000573464	44.236
rs6439649	T	G	T	G	0.070999	-6.88e-05	0.562	0.601529	FALSE	FALSE	FALSE	ukb-b-16713	3	136371691	0.00010504	463010	0.51	Diagnoses - secondary ICD10: C78.7 Secondary malignant neoplasm of liver || id:ukb-b-16713	Diagnoses - secondary ICD10: C78.7 Secondary malignant neoplasm of liver	Diagnoses - secondary ICD10: C78.7 Secondary malignant neoplasm of liver || ||	TRUE	igd	3	136371691	0.0111	1.37e-10	77096	ieu-b-42	schizophrenia || id:ieu-b-42	TRUE	reported	igd	2	TRUE	0.000530391	40.9117
rs6704768	A	G	A	G	-0.0766	-8.63e-05	0.529	0.569458	FALSE	FALSE	FALSE	ukb-b-16713	2	233592501	0.000104061	463010	0.41	Diagnoses - secondary ICD10: C78.7 Secondary malignant neoplasm of liver || id:ukb-b-16713	Diagnoses - secondary ICD10: C78.7 Secondary malignant neoplasm of liver	Diagnoses - secondary ICD10: C78.7 Secondary malignant neoplasm of liver || ||	TRUE	igd	2	233592501	0.0109	2.06e-12	77096	ieu-b-42	schizophrenia || id:ieu-b-42	TRUE	reported	igd	2	TRUE	0.000640169	49.3848
rs73191547	T	A	T	A	0.066899	-3.25e-05	0.286	0.333102	FALSE	TRUE	FALSE	ukb-b-16713	8	10033425	0.00010936	463010	0.77	Diagnoses - secondary ICD10: C78.7 Secondary malignant neoplasm of liver || id:ukb-b-16713	Diagnoses - secondary ICD10: C78.7 Secondary malignant neoplasm of liver	Diagnoses - secondary ICD10: C78.7 Secondary malignant neoplasm of liver || ||	TRUE	igd	8	10033425	0.0115	6.13e-09	77096	ieu-b-42	schizophrenia || id:ieu-b-42	TRUE	reported	igd	2	TRUE	0.000438754	33.8402
rs75968099	T	C	T	C	0.080104	-1.81e-05	0.351	0.346275	FALSE	FALSE	FALSE	ukb-b-16713	3	36858583	0.000108585	463010	0.87	Diagnoses - secondary ICD10: C78.7 Secondary malignant neoplasm of liver || id:ukb-b-16713	Diagnoses - secondary ICD10: C78.7 Secondary malignant neoplasm of liver	Diagnoses - secondary ICD10: C78.7 Secondary malignant neoplasm of liver || ||	TRUE	igd	3	36858583	0.0114	2.31e-12	77096	ieu-b-42	schizophrenia || id:ieu-b-42	TRUE	reported	igd	2	TRUE	0.000640013	49.3728
rs7601312	G	A	G	A	0.058997	-0.000115919	0.484	0.482271	FALSE	FALSE	FALSE	ukb-b-16713	2	229320093	0.000103043	463010	0.26	Diagnoses - secondary ICD10: C78.7 Secondary malignant neoplasm of liver || id:ukb-b-16713	Diagnoses - secondary ICD10: C78.7 Secondary malignant neoplasm of liver	Diagnoses - secondary ICD10: C78.7 Secondary malignant neoplasm of liver || ||	TRUE	igd	2	229320093	0.0108	4.67e-08	77096	ieu-b-42	schizophrenia || id:ieu-b-42	TRUE	reported	igd	2	TRUE	0.000386912	29.8402
rs760648	A	G	A	G	0.075803	-7.5e-05	0.416	0.432744	FALSE	FALSE	FALSE	ukb-b-16713	22	42571028	0.000104646	463010	0.47	Diagnoses - secondary ICD10: C78.7 Secondary malignant neoplasm of liver || id:ukb-b-16713	Diagnoses - secondary ICD10: C78.7 Secondary malignant neoplasm of liver	Diagnoses - secondary ICD10: C78.7 Secondary malignant neoplasm of liver || ||	TRUE	igd	22	42571028	0.0118	1.27e-10	77096	ieu-b-42	schizophrenia || id:ieu-b-42	TRUE	reported	igd	2	TRUE	0.000534989	41.2665
rs783540	G	A	G	A	0.059899	9.48e-05	0.43	0.393659	FALSE	FALSE	FALSE	ukb-b-16713	15	83254708	0.000102895	463010	0.36	Diagnoses - secondary ICD10: C78.7 Secondary malignant neoplasm of liver || id:ukb-b-16713	Diagnoses - secondary ICD10: C78.7 Secondary malignant neoplasm of liver	Diagnoses - secondary ICD10: C78.7 Secondary malignant neoplasm of liver || ||	TRUE	igd	15	83254708	0.011	4.77e-08	77096	ieu-b-42	schizophrenia || id:ieu-b-42	TRUE	reported	igd	2	TRUE	0.000384463	29.6512
rs832190	T	C	T	C	-0.069897	-0.000128698	0.613	0.635385	FALSE	FALSE	FALSE	ukb-b-16713	3	63842629	0.000107292	463010	0.23	Diagnoses - secondary ICD10: C78.7 Secondary malignant neoplasm of liver || id:ukb-b-16713	Diagnoses - secondary ICD10: C78.7 Secondary malignant neoplasm of liver	Diagnoses - secondary ICD10: C78.7 Secondary malignant neoplasm of liver || ||	TRUE	igd	3	63842629	0.0113	5.73e-10	77096	ieu-b-42	schizophrenia || id:ieu-b-42	TRUE	reported	igd	2	TRUE	0.000496036	38.2603
rs9636107	G	A	G	A	0.079595	-4.27e-05	0.497	0.470927	FALSE	FALSE	FALSE	ukb-b-16713	18	53200117	0.000103436	463010	0.68	Diagnoses - secondary ICD10: C78.7 Secondary malignant neoplasm of liver || id:ukb-b-16713	Diagnoses - secondary ICD10: C78.7 Secondary malignant neoplasm of liver	Diagnoses - secondary ICD10: C78.7 Secondary malignant neoplasm of liver || ||	TRUE	igd	18	53200117	0.0108	2.17e-13	77096	ieu-b-42	schizophrenia || id:ieu-b-42	TRUE	reported	igd	2	TRUE	0.000704022	54.3141
rs1024582	G	A	G	A	-0.098904	-3.56e-05	0.66	0.653099	FALSE	FALSE	FALSE	ukb-b-20145	12	2402246	0.000124283	462933	0.77	Cancer code	self-reported: colon cancer/sigmoid cancer || id:ukb-b-20145	Cancer code	self-reported: colon cancer/sigmoid cancer	Cancer code	self-reported: colon cancer/sigmoid cancer || ||	TRUE	igd	12	2402246	0.0115	6.27e-18	77096	ieu-b-42	schizophrenia || id:ieu-b-42	TRUE	reported	igd	2	TRUE	0.000958481	73.9641
rs10791097	G	T	G	T	-0.0766	-0.000144164	0.52	0.526492	FALSE	FALSE	FALSE	ukb-b-20145	11	130718630	0.000118377	462933	0.22	Cancer code	self-reported: colon cancer/sigmoid cancer || id:ukb-b-20145	Cancer code	self-reported: colon cancer/sigmoid cancer	Cancer code	self-reported: colon cancer/sigmoid cancer || ||	TRUE	igd	11	130718630	0.0109	2.05e-12	77096	ieu-b-42	schizophrenia || id:ieu-b-42	TRUE	reported	igd	2	TRUE	0.000640169	49.3848
rs11027857	A	G	A	G	0.063998	6.77e-05	0.587	0.51553	FALSE	FALSE	FALSE	ukb-b-20145	11	24403620	0.000117883	462933	0.57	Cancer code	self-reported: colon cancer/sigmoid cancer || id:ukb-b-20145	Cancer code	self-reported: colon cancer/sigmoid cancer	Cancer code	self-reported: colon cancer/sigmoid cancer || ||	TRUE	igd	11	24403620	0.0109	3.67e-09	77096	ieu-b-42	schizophrenia || id:ieu-b-42	TRUE	reported	igd	2	TRUE	0.000446945	34.4722
rs1106568	A	G	A	G	-0.069404	-2.89e-05	0.744	0.75874	FALSE	FALSE	FALSE	ukb-b-20145	4	176861301	0.000137968	462933	0.83	Cancer code	self-reported: colon cancer/sigmoid cancer || id:ukb-b-20145	Cancer code	self-reported: colon cancer/sigmoid cancer	Cancer code	self-reported: colon cancer/sigmoid cancer || ||	TRUE	igd	4	176861301	0.0125	2.85e-08	77096	ieu-b-42	schizophrenia || id:ieu-b-42	TRUE	reported	igd	2	TRUE	0.000399709	30.8275
rs111294930	G	A	G	A	-0.087699	-0.000160026	0.219	0.292853	FALSE	FALSE	FALSE	ukb-b-20145	5	152177121	0.000130314	462933	0.22	Cancer code	self-reported: colon cancer/sigmoid cancer || id:ukb-b-20145	Cancer code	self-reported: colon cancer/sigmoid cancer	Cancer code	self-reported: colon cancer/sigmoid cancer || ||	TRUE	igd	5	152177121	0.0143	9.29e-10	77096	ieu-b-42	schizophrenia || id:ieu-b-42	TRUE	reported	igd	2	TRUE	0.000487611	37.6102
rs11139497	A	T	A	T	0.0656	-1.71e-05	0.336	0.327522	FALSE	TRUE	FALSE	ukb-b-20145	9	84739941	0.00012567	462933	0.89	Cancer code	self-reported: colon cancer/sigmoid cancer || id:ukb-b-20145	Cancer code	self-reported: colon cancer/sigmoid cancer	Cancer code	self-reported: colon cancer/sigmoid cancer || ||	TRUE	igd	9	84739941	0.0118	2.65e-08	77096	ieu-b-42	schizophrenia || id:ieu-b-42	TRUE	reported	igd	2	TRUE	0.000400717	30.9053
rs11191419	A	T	A	T	-0.101601	-5.72e-05	0.334	0.329111	FALSE	TRUE	FALSE	ukb-b-20145	10	104612335	0.000125445	462933	0.649999	Cancer code	self-reported: colon cancer/sigmoid cancer || id:ukb-b-20145	Cancer code	self-reported: colon cancer/sigmoid cancer	Cancer code	self-reported: colon cancer/sigmoid cancer || ||	TRUE	igd	10	104612335	0.0118	6.69e-18	77096	ieu-b-42	schizophrenia || id:ieu-b-42	TRUE	reported	igd	2	TRUE	0.000960689	74.1346
rs11210892	A	G	A	G	-0.067797	-8.62e-05	0.652	0.674047	FALSE	FALSE	FALSE	ukb-b-20145	1	44100084	0.000125684	462933	0.49	Cancer code	self-reported: colon cancer/sigmoid cancer || id:ukb-b-20145	Cancer code	self-reported: colon cancer/sigmoid cancer	Cancer code	self-reported: colon cancer/sigmoid cancer || ||	TRUE	igd	1	44100084	0.0115	3.42e-09	77096	ieu-b-42	schizophrenia || id:ieu-b-42	TRUE	reported	igd	2	TRUE	0.000450607	34.7547
rs11658257	C	G	C	G	-0.066204	-0.000222456	0.573	0.693283	FALSE	TRUE	TRUE	ukb-b-20145	17	17958402	0.000127788	462933	0.0819993	Cancer code	self-reported: colon cancer/sigmoid cancer || id:ukb-b-20145	Cancer code	self-reported: colon cancer/sigmoid cancer	Cancer code	self-reported: colon cancer/sigmoid cancer || ||	TRUE	igd	17	17956459	0.0115	8.34e-09	77096	ieu-b-42	schizophrenia || id:ieu-b-42	TRUE	reported	igd	2	FALSE	0.000429689	33.1407
rs11682175	C	T	C	T	0.073496	8.19e-05	0.439	0.473318	FALSE	FALSE	FALSE	ukb-b-20145	2	57987593	0.000118428	462933	0.49	Cancer code	self-reported: colon cancer/sigmoid cancer || id:ukb-b-20145	Cancer code	self-reported: colon cancer/sigmoid cancer	Cancer code	self-reported: colon cancer/sigmoid cancer || ||	TRUE	igd	2	57987593	0.0109	1.58e-11	77096	ieu-b-42	schizophrenia || id:ieu-b-42	TRUE	reported	igd	2	TRUE	0.000589368	45.4635
rs11693094	T	C	T	C	-0.073603	0.000202928	0.429	0.464616	FALSE	FALSE	FALSE	ukb-b-20145	2	185601420	0.000118447	462933	0.0870001	Cancer code	self-reported: colon cancer/sigmoid cancer || id:ukb-b-20145	Cancer code	self-reported: colon cancer/sigmoid cancer	Cancer code	self-reported: colon cancer/sigmoid cancer || ||	TRUE	igd	2	185601420	0.011	2.17e-11	77096	ieu-b-42	schizophrenia || id:ieu-b-42	TRUE	reported	igd	2	TRUE	0.000580392	44.7708
rs11740474	T	A	T	A	0.062695	-0.00010206	0.412	0.417155	FALSE	TRUE	FALSE	ukb-b-20145	5	153680747	0.000120309	462933	0.4	Cancer code	self-reported: colon cancer/sigmoid cancer || id:ukb-b-20145	Cancer code	self-reported: colon cancer/sigmoid cancer	Cancer code	self-reported: colon cancer/sigmoid cancer || ||	TRUE	igd	5	153680747	0.0112	2e-08	77096	ieu-b-42	schizophrenia || id:ieu-b-42	TRUE	reported	igd	2	TRUE	0.000406276	31.3342
rs1191551	G	T	G	T	-0.071697	4.29e-05	0.784	0.234702	FALSE	FALSE	FALSE	ukb-b-20145	14	30000661	0.000139509	462933	0.760001	Cancer code	self-reported: colon cancer/sigmoid cancer || id:ukb-b-20145	Cancer code	self-reported: colon cancer/sigmoid cancer	Cancer code	self-reported: colon cancer/sigmoid cancer || ||	TRUE	igd	14	30000405	0.0131	4.21e-08	77096	ieu-b-42	schizophrenia || id:ieu-b-42	TRUE	reported	igd	2	TRUE	0.000388382	29.9535
rs12691307	G	A	G	A	-0.071902	0.000110761	0.478	0.558574	FALSE	FALSE	FALSE	ukb-b-20145	16	29939877	0.000118674	462933	0.35	Cancer code	self-reported: colon cancer/sigmoid cancer || id:ukb-b-20145	Cancer code	self-reported: colon cancer/sigmoid cancer	Cancer code	self-reported: colon cancer/sigmoid cancer || ||	TRUE	igd	16	29939877	0.0113	2.03e-10	77096	ieu-b-42	schizophrenia || id:ieu-b-42	TRUE	reported	igd	2	TRUE	0.000524886	40.4868
rs12887734	T	G	T	G	0.088304	-1.32e-05	0.273	0.287523	FALSE	FALSE	FALSE	ukb-b-20145	14	104046834	0.00013046	462933	0.92	Cancer code	self-reported: colon cancer/sigmoid cancer || id:ukb-b-20145	Cancer code	self-reported: colon cancer/sigmoid cancer	Cancer code	self-reported: colon cancer/sigmoid cancer || ||	TRUE	igd	14	104046834	0.0121	3.72e-13	77096	ieu-b-42	schizophrenia || id:ieu-b-42	TRUE	reported	igd	2	TRUE	0.000690332	53.2573
rs12932476	G	C	G	C	-0.059702	1.31e-05	0.512	0.517958	FALSE	TRUE	TRUE	ukb-b-20145	16	63709630	0.000118586	462933	0.91	Cancer code	self-reported: colon cancer/sigmoid cancer || id:ukb-b-20145	Cancer code	self-reported: colon cancer/sigmoid cancer	Cancer code	self-reported: colon cancer/sigmoid cancer || ||	TRUE	igd	16	63709630	0.0109	4.62e-08	77096	ieu-b-42	schizophrenia || id:ieu-b-42	TRUE	reported	igd	2	FALSE	0.000388977	29.9995
rs13240464	C	T	C	T	-0.080704	-7.87e-05	0.379	0.33285	FALSE	FALSE	FALSE	ukb-b-20145	7	110898915	0.000125114	462933	0.53	Cancer code	self-reported: colon cancer/sigmoid cancer || id:ukb-b-20145	Cancer code	self-reported: colon cancer/sigmoid cancer	Cancer code	self-reported: colon cancer/sigmoid cancer || ||	TRUE	igd	7	110898915	0.0116	3.12e-12	77096	ieu-b-42	schizophrenia || id:ieu-b-42	TRUE	reported	igd	2	TRUE	0.000627436	48.402
rs13261481	G	T	G	T	-0.062402	-2.2e-05	0.591	0.553568	FALSE	FALSE	FALSE	ukb-b-20145	8	60706091	0.000118658	462933	0.85	Cancer code	self-reported: colon cancer/sigmoid cancer || id:ukb-b-20145	Cancer code	self-reported: colon cancer/sigmoid cancer	Cancer code	self-reported: colon cancer/sigmoid cancer || ||	TRUE	igd	8	60701801	0.011	1.66e-08	77096	ieu-b-42	schizophrenia || id:ieu-b-42	TRUE	reported	igd	2	TRUE	0.000417252	32.1811
rs1339227	T	C	T	C	-0.063302	-9.75e-05	0.355	0.371583	FALSE	FALSE	FALSE	ukb-b-20145	6	73157926	0.000123551	462933	0.43	Cancer code	self-reported: colon cancer/sigmoid cancer || id:ukb-b-20145	Cancer code	self-reported: colon cancer/sigmoid cancer	Cancer code	self-reported: colon cancer/sigmoid cancer || ||	TRUE	igd	6	73155701	0.0114	3.06e-08	77096	ieu-b-42	schizophrenia || id:ieu-b-42	TRUE	reported	igd	2	TRUE	0.000399779	30.8329
rs1498232	C	T	C	T	-0.072004	-6.08e-05	0.697	0.691586	FALSE	FALSE	FALSE	ukb-b-20145	1	30433951	0.000128131	462933	0.64	Cancer code	self-reported: colon cancer/sigmoid cancer || id:ukb-b-20145	Cancer code	self-reported: colon cancer/sigmoid cancer	Cancer code	self-reported: colon cancer/sigmoid cancer || ||	TRUE	igd	1	30433951	0.0118	1.21e-09	77096	ieu-b-42	schizophrenia || id:ieu-b-42	TRUE	reported	igd	2	TRUE	0.000482734	37.2339
rs1509378	G	A	G	A	-0.0692	0.000106777	0.646	0.675519	FALSE	FALSE	FALSE	ukb-b-20145	2	22754466	0.000125858	462933	0.4	Cancer code	self-reported: colon cancer/sigmoid cancer || id:ukb-b-20145	Cancer code	self-reported: colon cancer/sigmoid cancer	Cancer code	self-reported: colon cancer/sigmoid cancer || ||	TRUE	igd	2	22754466	0.0119	5.39e-09	77096	ieu-b-42	schizophrenia || id:ieu-b-42	TRUE	reported	igd	2	TRUE	0.000438426	33.8148
rs1615350	T	C	T	C	-0.0851	-0.000219766	0.734	0.751374	FALSE	FALSE	FALSE	ukb-b-20145	12	123650335	0.000136528	462933	0.11	Cancer code	self-reported: colon cancer/sigmoid cancer || id:ukb-b-20145	Cancer code	self-reported: colon cancer/sigmoid cancer	Cancer code	self-reported: colon cancer/sigmoid cancer || ||	TRUE	igd	12	123650335	0.0123	4.26e-12	77096	ieu-b-42	schizophrenia || id:ieu-b-42	TRUE	reported	igd	2	TRUE	0.000620508	47.8672
rs17108967	C	T	C	T	0.065296	-7.73e-05	0.343	0.337583	FALSE	FALSE	FALSE	ukb-b-20145	14	71542168	0.000124719	462933	0.54	Cancer code	self-reported: colon cancer/sigmoid cancer || id:ukb-b-20145	Cancer code	self-reported: colon cancer/sigmoid cancer	Cancer code	self-reported: colon cancer/sigmoid cancer || ||	TRUE	igd	14	71542168	0.0115	1.21e-08	77096	ieu-b-42	schizophrenia || id:ieu-b-42	TRUE	reported	igd	2	TRUE	0.000417988	32.2379
rs2053079	G	A	G	A	0.071797	-4.83e-05	0.265	0.249499	FALSE	FALSE	FALSE	ukb-b-20145	19	30987423	0.000137137	462933	0.719999	Cancer code	self-reported: colon cancer/sigmoid cancer || id:ukb-b-20145	Cancer code	self-reported: colon cancer/sigmoid cancer	Cancer code	self-reported: colon cancer/sigmoid cancer || ||	TRUE	igd	19	30987423	0.0127	1.74e-08	77096	ieu-b-42	schizophrenia || id:ieu-b-42	TRUE	reported	igd	2	TRUE	0.000414375	31.9591
rs2103655	A	G	A	G	0.0766	1.02e-05	0.664	0.70208	FALSE	FALSE	FALSE	ukb-b-20145	20	37425958	0.000128973	462933	0.94	Cancer code	self-reported: colon cancer/sigmoid cancer || id:ukb-b-20145	Cancer code	self-reported: colon cancer/sigmoid cancer	Cancer code	self-reported: colon cancer/sigmoid cancer || ||	TRUE	igd	20	37425958	0.0119	1.24e-10	77096	ieu-b-42	schizophrenia || id:ieu-b-42	TRUE	reported	igd	2	TRUE	0.000537154	41.4336
rs215411	A	T	A	T	0.0692	-0.00017241	0.327	0.325165	FALSE	TRUE	FALSE	ukb-b-20145	4	23423603	0.000126368	462933	0.17	Cancer code	self-reported: colon cancer/sigmoid cancer || id:ukb-b-20145	Cancer code	self-reported: colon cancer/sigmoid cancer	Cancer code	self-reported: colon cancer/sigmoid cancer || ||	TRUE	igd	4	23423603	0.0115	1.68e-09	77096	ieu-b-42	schizophrenia || id:ieu-b-42	TRUE	reported	igd	2	TRUE	0.000469441	36.2081
rs2332700	G	C	G	C	-0.0771	-0.000151257	0.756	0.752009	FALSE	TRUE	FALSE	ukb-b-20145	14	72417326	0.000136773	462933	0.27	Cancer code	self-reported: colon cancer/sigmoid cancer || id:ukb-b-20145	Cancer code	self-reported: colon cancer/sigmoid cancer	Cancer code	self-reported: colon cancer/sigmoid cancer || ||	TRUE	igd	14	72417326	0.0125	7.38e-10	77096	ieu-b-42	schizophrenia || id:ieu-b-42	TRUE	reported	igd	2	TRUE	0.000493222	38.0432
rs2414718	A	G	A	G	0.069797	-0.000177453	0.617	0.592419	FALSE	FALSE	FALSE	ukb-b-20145	15	61863133	0.000120083	462933	0.14	Cancer code	self-reported: colon cancer/sigmoid cancer || id:ukb-b-20145	Cancer code	self-reported: colon cancer/sigmoid cancer	Cancer code	self-reported: colon cancer/sigmoid cancer || ||	TRUE	igd	15	61863133	0.011	1.98e-10	77096	ieu-b-42	schizophrenia || id:ieu-b-42	TRUE	reported	igd	2	TRUE	0.000521951	40.2603
rs2514218	T	C	T	C	-0.072205	-3.62e-05	0.327	0.35612	FALSE	FALSE	FALSE	ukb-b-20145	11	113392994	0.000123602	462933	0.77	Cancer code	self-reported: colon cancer/sigmoid cancer || id:ukb-b-20145	Cancer code	self-reported: colon cancer/sigmoid cancer	Cancer code	self-reported: colon cancer/sigmoid cancer || ||	TRUE	igd	11	113392994	0.0116	4.64e-10	77096	ieu-b-42	schizophrenia || id:ieu-b-42	TRUE	reported	igd	2	TRUE	0.000502306	38.7443
rs2535627	C	T	C	T	-0.070403	1.8e-05	0.503	0.463423	FALSE	FALSE	FALSE	ukb-b-20145	3	52845105	0.000118613	462933	0.88	Cancer code	self-reported: colon cancer/sigmoid cancer || id:ukb-b-20145	Cancer code	self-reported: colon cancer/sigmoid cancer	Cancer code	self-reported: colon cancer/sigmoid cancer || ||	TRUE	igd	3	52845105	0.0109	1.17e-10	77096	ieu-b-42	schizophrenia || id:ieu-b-42	TRUE	reported	igd	2	TRUE	0.000540832	41.7175
rs2693698	G	A	G	A	0.061705	-1.6e-05	0.551	0.542032	FALSE	FALSE	FALSE	ukb-b-20145	14	99719219	0.000119044	462933	0.89	Cancer code	self-reported: colon cancer/sigmoid cancer || id:ukb-b-20145	Cancer code	self-reported: colon cancer/sigmoid cancer	Cancer code	self-reported: colon cancer/sigmoid cancer || ||	TRUE	igd	14	99719219	0.0111	2.99e-08	77096	ieu-b-42	schizophrenia || id:ieu-b-42	TRUE	reported	igd	2	TRUE	0.000400672	30.9018
rs2905432	A	G	A	G	-0.066001	-4.33e-05	0.671	0.648106	FALSE	FALSE	FALSE	ukb-b-20145	19	19484295	0.000123537	462933	0.73	Cancer code	self-reported: colon cancer/sigmoid cancer || id:ukb-b-20145	Cancer code	self-reported: colon cancer/sigmoid cancer	Cancer code	self-reported: colon cancer/sigmoid cancer || ||	TRUE	igd	19	19484295	0.0114	7.51e-09	77096	ieu-b-42	schizophrenia || id:ieu-b-42	TRUE	reported	igd	2	TRUE	0.000434581	33.5182
rs2909457	A	G	A	G	-0.059697	-5.99e-05	0.574	0.535096	FALSE	FALSE	FALSE	ukb-b-20145	2	162845855	0.000118319	462933	0.61	Cancer code	self-reported: colon cancer/sigmoid cancer || id:ukb-b-20145	Cancer code	self-reported: colon cancer/sigmoid cancer	Cancer code	self-reported: colon cancer/sigmoid cancer || ||	TRUE	igd	2	162845855	0.0109	4.25e-08	77096	ieu-b-42	schizophrenia || id:ieu-b-42	TRUE	reported	igd	2	TRUE	0.000388912	29.9944
rs301797	A	C	A	C	0.066097	-6.62e-05	0.322	0.339863	FALSE	FALSE	FALSE	ukb-b-20145	1	8487323	0.000124583	462933	0.6	Cancer code	self-reported: colon cancer/sigmoid cancer || id:ukb-b-20145	Cancer code	self-reported: colon cancer/sigmoid cancer	Cancer code	self-reported: colon cancer/sigmoid cancer || ||	TRUE	igd	1	8487323	0.0116	1.2e-08	77096	ieu-b-42	schizophrenia || id:ieu-b-42	TRUE	reported	igd	2	TRUE	0.000420952	32.4666
rs35998080	T	G	T	G	0.069004	0.000116627	0.45	0.426135	FALSE	FALSE	FALSE	ukb-b-20145	1	73278615	0.000120415	462933	0.33	Cancer code	self-reported: colon cancer/sigmoid cancer || id:ukb-b-20145	Cancer code	self-reported: colon cancer/sigmoid cancer	Cancer code	self-reported: colon cancer/sigmoid cancer || ||	TRUE	igd	1	73278615	0.0112	6.95e-10	77096	ieu-b-42	schizophrenia || id:ieu-b-42	TRUE	reported	igd	2	TRUE	0.000492115	37.9578
rs3798869	A	G	A	G	-0.066802	0.000102772	0.464	0.437303	FALSE	FALSE	FALSE	ukb-b-20145	6	84328660	0.00011888	462933	0.39	Cancer code	self-reported: colon cancer/sigmoid cancer || id:ukb-b-20145	Cancer code	self-reported: colon cancer/sigmoid cancer	Cancer code	self-reported: colon cancer/sigmoid cancer || ||	TRUE	igd	6	84328660	0.011	1.09e-09	77096	ieu-b-42	schizophrenia || id:ieu-b-42	TRUE	reported	igd	2	TRUE	0.000478139	36.8793
rs3849046	T	C	T	C	0.062496	9.7e-05	0.508	0.532922	FALSE	FALSE	FALSE	ukb-b-20145	5	137851192	0.000119969	462933	0.42	Cancer code	self-reported: colon cancer/sigmoid cancer || id:ukb-b-20145	Cancer code	self-reported: colon cancer/sigmoid cancer	Cancer code	self-reported: colon cancer/sigmoid cancer || ||	TRUE	igd	5	137851192	0.0109	1.04e-08	77096	ieu-b-42	schizophrenia || id:ieu-b-42	TRUE	reported	igd	2	TRUE	0.000426221	32.8731
rs4129585	C	A	C	A	-0.079301	0.000119741	0.558	0.560843	FALSE	FALSE	FALSE	ukb-b-20145	8	143312933	0.000118755	462933	0.31	Cancer code	self-reported: colon cancer/sigmoid cancer || id:ukb-b-20145	Cancer code	self-reported: colon cancer/sigmoid cancer	Cancer code	self-reported: colon cancer/sigmoid cancer || ||	TRUE	igd	8	143312933	0.0109	3.61e-13	77096	ieu-b-42	schizophrenia || id:ieu-b-42	TRUE	reported	igd	2	TRUE	0.000686079	52.9289
rs4391122	G	A	G	A	0.078005	7.62e-06	0.462	0.501218	FALSE	FALSE	FALSE	ukb-b-20145	5	60598543	0.000118529	462933	0.95	Cancer code	self-reported: colon cancer/sigmoid cancer || id:ukb-b-20145	Cancer code	self-reported: colon cancer/sigmoid cancer	Cancer code	self-reported: colon cancer/sigmoid cancer || ||	TRUE	igd	5	60598543	0.0109	8.9e-13	77096	ieu-b-42	schizophrenia || id:ieu-b-42	TRUE	reported	igd	2	TRUE	0.000663853	51.213
rs4523957	T	G	T	G	0.069703	6.59e-05	0.603	0.640914	FALSE	FALSE	FALSE	ukb-b-20145	17	2208899	0.000123361	462933	0.59	Cancer code	self-reported: colon cancer/sigmoid cancer || id:ukb-b-20145	Cancer code	self-reported: colon cancer/sigmoid cancer	Cancer code	self-reported: colon cancer/sigmoid cancer || ||	TRUE	igd	17	2208899	0.0115	1.4e-09	77096	ieu-b-42	schizophrenia || id:ieu-b-42	TRUE	reported	igd	2	TRUE	0.000476287	36.7363
rs4648845	T	C	T	C	0.067201	-0.000170534	0.479	0.484302	FALSE	FALSE	FALSE	ukb-b-20145	1	2387101	0.000118601	462933	0.15	Cancer code	self-reported: colon cancer/sigmoid cancer || id:ukb-b-20145	Cancer code	self-reported: colon cancer/sigmoid cancer	Cancer code	self-reported: colon cancer/sigmoid cancer || ||	TRUE	igd	1	2387101	0.0119	1.74e-08	77096	ieu-b-42	schizophrenia || id:ieu-b-42	TRUE	reported	igd	2	TRUE	0.000413472	31.8894
rs4702	A	G	A	G	-0.080505	-6.82e-05	0.574	0.556439	FALSE	FALSE	FALSE	ukb-b-20145	15	91426560	0.000118652	462933	0.57	Cancer code	self-reported: colon cancer/sigmoid cancer || id:ukb-b-20145	Cancer code	self-reported: colon cancer/sigmoid cancer	Cancer code	self-reported: colon cancer/sigmoid cancer || ||	TRUE	igd	15	91426560	0.0115	2.62e-12	77096	ieu-b-42	schizophrenia || id:ieu-b-42	TRUE	reported	igd	2	TRUE	0.000635246	49.0048
rs4766428	T	C	T	C	0.069395	-0.00025706	0.459	0.431572	FALSE	FALSE	FALSE	ukb-b-20145	12	110723245	0.000119652	462933	0.032	Cancer code	self-reported: colon cancer/sigmoid cancer || id:ukb-b-20145	Cancer code	self-reported: colon cancer/sigmoid cancer	Cancer code	self-reported: colon cancer/sigmoid cancer || ||	TRUE	igd	12	110723245	0.0112	6.12e-10	77096	ieu-b-42	schizophrenia || id:ieu-b-42	TRUE	reported	igd	2	TRUE	0.000497705	38.3892
rs55775495	T	C	T	C	-0.068996	0.000284248	0.701	0.646743	FALSE	FALSE	FALSE	ukb-b-20145	2	198245965	0.000123541	462933	0.021	Cancer code	self-reported: colon cancer/sigmoid cancer || id:ukb-b-20145	Cancer code	self-reported: colon cancer/sigmoid cancer	Cancer code	self-reported: colon cancer/sigmoid cancer || ||	TRUE	igd	2	198245965	0.0114	1.56e-09	77096	ieu-b-42	schizophrenia || id:ieu-b-42	TRUE	reported	igd	2	TRUE	0.000474898	36.6292
rs58120505	C	T	C	T	-0.082197	-3.54e-05	0.412	0.43402	FALSE	FALSE	FALSE	ukb-b-20145	7	2029867	0.000118864	462933	0.77	Cancer code	self-reported: colon cancer/sigmoid cancer || id:ukb-b-20145	Cancer code	self-reported: colon cancer/sigmoid cancer	Cancer code	self-reported: colon cancer/sigmoid cancer || ||	TRUE	igd	7	2029867	0.0111	1.26e-13	77096	ieu-b-42	schizophrenia || id:ieu-b-42	TRUE	reported	igd	2	TRUE	0.000710764	54.8346
rs5995756	C	T	C	T	-0.072497	-6.22e-05	0.54	0.573312	FALSE	FALSE	FALSE	ukb-b-20145	22	40000313	0.000119435	462933	0.6	Cancer code	self-reported: colon cancer/sigmoid cancer || id:ukb-b-20145	Cancer code	self-reported: colon cancer/sigmoid cancer	Cancer code	self-reported: colon cancer/sigmoid cancer || ||	TRUE	igd	22	40000313	0.0109	2.91e-11	77096	ieu-b-42	schizophrenia || id:ieu-b-42	TRUE	reported	igd	2	TRUE	0.000573464	44.236
rs6439649	T	G	T	G	0.070999	-3.21e-05	0.562	0.601521	FALSE	FALSE	FALSE	ukb-b-20145	3	136371691	0.000120265	462933	0.79	Cancer code	self-reported: colon cancer/sigmoid cancer || id:ukb-b-20145	Cancer code	self-reported: colon cancer/sigmoid cancer	Cancer code	self-reported: colon cancer/sigmoid cancer || ||	TRUE	igd	3	136371691	0.0111	1.37e-10	77096	ieu-b-42	schizophrenia || id:ieu-b-42	TRUE	reported	igd	2	TRUE	0.000530391	40.9117
rs6704768	A	G	A	G	-0.0766	0.000125137	0.529	0.569472	FALSE	FALSE	FALSE	ukb-b-20145	2	233592501	0.000119144	462933	0.29	Cancer code	self-reported: colon cancer/sigmoid cancer || id:ukb-b-20145	Cancer code	self-reported: colon cancer/sigmoid cancer	Cancer code	self-reported: colon cancer/sigmoid cancer || ||	TRUE	igd	2	233592501	0.0109	2.06e-12	77096	ieu-b-42	schizophrenia || id:ieu-b-42	TRUE	reported	igd	2	TRUE	0.000640169	49.3848
rs73191547	T	A	T	A	0.066899	-6.44e-06	0.286	0.333098	FALSE	TRUE	FALSE	ukb-b-20145	8	10033425	0.000125211	462933	0.96	Cancer code	self-reported: colon cancer/sigmoid cancer || id:ukb-b-20145	Cancer code	self-reported: colon cancer/sigmoid cancer	Cancer code	self-reported: colon cancer/sigmoid cancer || ||	TRUE	igd	8	10033425	0.0115	6.13e-09	77096	ieu-b-42	schizophrenia || id:ieu-b-42	TRUE	reported	igd	2	TRUE	0.000438754	33.8402
rs75968099	T	C	T	C	0.080104	9.47e-05	0.351	0.346279	FALSE	FALSE	FALSE	ukb-b-20145	3	36858583	0.000124323	462933	0.450001	Cancer code	self-reported: colon cancer/sigmoid cancer || id:ukb-b-20145	Cancer code	self-reported: colon cancer/sigmoid cancer	Cancer code	self-reported: colon cancer/sigmoid cancer || ||	TRUE	igd	3	36858583	0.0114	2.31e-12	77096	ieu-b-42	schizophrenia || id:ieu-b-42	TRUE	reported	igd	2	TRUE	0.000640013	49.3728
rs7601312	G	A	G	A	0.058997	-8.98e-05	0.484	0.48228	FALSE	FALSE	FALSE	ukb-b-20145	2	229320093	0.00011798	462933	0.450001	Cancer code	self-reported: colon cancer/sigmoid cancer || id:ukb-b-20145	Cancer code	self-reported: colon cancer/sigmoid cancer	Cancer code	self-reported: colon cancer/sigmoid cancer || ||	TRUE	igd	2	229320093	0.0108	4.67e-08	77096	ieu-b-42	schizophrenia || id:ieu-b-42	TRUE	reported	igd	2	TRUE	0.000386912	29.8402
rs760648	A	G	A	G	0.075803	-0.000205542	0.416	0.432745	FALSE	FALSE	FALSE	ukb-b-20145	22	42571028	0.000119814	462933	0.0860003	Cancer code	self-reported: colon cancer/sigmoid cancer || id:ukb-b-20145	Cancer code	self-reported: colon cancer/sigmoid cancer	Cancer code	self-reported: colon cancer/sigmoid cancer || ||	TRUE	igd	22	42571028	0.0118	1.27e-10	77096	ieu-b-42	schizophrenia || id:ieu-b-42	TRUE	reported	igd	2	TRUE	0.000534989	41.2665
rs783540	G	A	G	A	0.059899	-4.97e-05	0.43	0.393666	FALSE	FALSE	FALSE	ukb-b-20145	15	83254708	0.000117808	462933	0.67	Cancer code	self-reported: colon cancer/sigmoid cancer || id:ukb-b-20145	Cancer code	self-reported: colon cancer/sigmoid cancer	Cancer code	self-reported: colon cancer/sigmoid cancer || ||	TRUE	igd	15	83254708	0.011	4.77e-08	77096	ieu-b-42	schizophrenia || id:ieu-b-42	TRUE	reported	igd	2	TRUE	0.000384463	29.6512
rs832190	T	C	T	C	-0.069897	-0.00015715	0.613	0.635386	FALSE	FALSE	FALSE	ukb-b-20145	3	63842629	0.000122844	462933	0.2	Cancer code	self-reported: colon cancer/sigmoid cancer || id:ukb-b-20145	Cancer code	self-reported: colon cancer/sigmoid cancer	Cancer code	self-reported: colon cancer/sigmoid cancer || ||	TRUE	igd	3	63842629	0.0113	5.73e-10	77096	ieu-b-42	schizophrenia || id:ieu-b-42	TRUE	reported	igd	2	TRUE	0.000496036	38.2603
rs9636107	G	A	G	A	0.079595	0.000202695	0.497	0.470925	FALSE	FALSE	FALSE	ukb-b-20145	18	53200117	0.000118427	462933	0.0870001	Cancer code	self-reported: colon cancer/sigmoid cancer || id:ukb-b-20145	Cancer code	self-reported: colon cancer/sigmoid cancer	Cancer code	self-reported: colon cancer/sigmoid cancer || ||	TRUE	igd	18	53200117	0.0108	2.17e-13	77096	ieu-b-42	schizophrenia || id:ieu-b-42	TRUE	reported	igd	2	TRUE	0.000704022	54.3141
rs1024582	G	A	G	A	-0.098904	8.45e-05	0.66	0.653102	FALSE	FALSE	FALSE	ukb-b-19425	12	2402246	0.000105938	463010	0.42	Diagnoses - main ICD10: C20 Malignant neoplasm of rectum || id:ukb-b-19425	Diagnoses - main ICD10: C20 Malignant neoplasm of rectum	Diagnoses - main ICD10: C20 Malignant neoplasm of rectum || ||	TRUE	igd	12	2402246	0.0115	6.27e-18	77096	ieu-b-42	schizophrenia || id:ieu-b-42	TRUE	reported	igd	2	TRUE	0.000958481	73.9641
rs10791097	G	T	G	T	-0.0766	0.000110826	0.52	0.526493	FALSE	FALSE	FALSE	ukb-b-19425	11	130718630	0.000100902	463010	0.27	Diagnoses - main ICD10: C20 Malignant neoplasm of rectum || id:ukb-b-19425	Diagnoses - main ICD10: C20 Malignant neoplasm of rectum	Diagnoses - main ICD10: C20 Malignant neoplasm of rectum || ||	TRUE	igd	11	130718630	0.0109	2.05e-12	77096	ieu-b-42	schizophrenia || id:ieu-b-42	TRUE	reported	igd	2	TRUE	0.000640169	49.3848
rs11027857	A	G	A	G	0.063998	-0.000106186	0.587	0.515522	FALSE	FALSE	FALSE	ukb-b-19425	11	24403620	0.00010048	463010	0.29	Diagnoses - main ICD10: C20 Malignant neoplasm of rectum || id:ukb-b-19425	Diagnoses - main ICD10: C20 Malignant neoplasm of rectum	Diagnoses - main ICD10: C20 Malignant neoplasm of rectum || ||	TRUE	igd	11	24403620	0.0109	3.67e-09	77096	ieu-b-42	schizophrenia || id:ieu-b-42	TRUE	reported	igd	2	TRUE	0.000446945	34.4722
rs11139497	A	T	A	T	0.0656	-9.05e-05	0.336	0.327524	FALSE	TRUE	FALSE	ukb-b-19425	9	84739941	0.000107117	463010	0.4	Diagnoses - main ICD10: C20 Malignant neoplasm of rectum || id:ukb-b-19425	Diagnoses - main ICD10: C20 Malignant neoplasm of rectum	Diagnoses - main ICD10: C20 Malignant neoplasm of rectum || ||	TRUE	igd	9	84739941	0.0118	2.65e-08	77096	ieu-b-42	schizophrenia || id:ieu-b-42	TRUE	reported	igd	2	TRUE	0.000400717	30.9053
rs11191419	A	T	A	T	-0.101601	-0.000109147	0.334	0.329105	FALSE	TRUE	FALSE	ukb-b-19425	10	104612335	0.000106928	463010	0.31	Diagnoses - main ICD10: C20 Malignant neoplasm of rectum || id:ukb-b-19425	Diagnoses - main ICD10: C20 Malignant neoplasm of rectum	Diagnoses - main ICD10: C20 Malignant neoplasm of rectum || ||	TRUE	igd	10	104612335	0.0118	6.69e-18	77096	ieu-b-42	schizophrenia || id:ieu-b-42	TRUE	reported	igd	2	TRUE	0.000960689	74.1346
rs11210892	A	G	A	G	-0.067797	1.05e-05	0.652	0.67404	FALSE	FALSE	FALSE	ukb-b-19425	1	44100084	0.000107133	463010	0.92	Diagnoses - main ICD10: C20 Malignant neoplasm of rectum || id:ukb-b-19425	Diagnoses - main ICD10: C20 Malignant neoplasm of rectum	Diagnoses - main ICD10: C20 Malignant neoplasm of rectum || ||	TRUE	igd	1	44100084	0.0115	3.42e-09	77096	ieu-b-42	schizophrenia || id:ieu-b-42	TRUE	reported	igd	2	TRUE	0.000450607	34.7547
rs11658257	C	G	C	G	-0.066204	-2.21e-05	0.573	0.64672	FALSE	TRUE	TRUE	ukb-b-19425	17	17967397	0.000105203	463010	0.83	Diagnoses - main ICD10: C20 Malignant neoplasm of rectum || id:ukb-b-19425	Diagnoses - main ICD10: C20 Malignant neoplasm of rectum	Diagnoses - main ICD10: C20 Malignant neoplasm of rectum || ||	TRUE	igd	17	17956459	0.0115	8.34e-09	77096	ieu-b-42	schizophrenia || id:ieu-b-42	TRUE	reported	igd	2	FALSE	0.000429689	33.1407
rs11682175	C	T	C	T	0.073496	6.75e-05	0.439	0.473316	FALSE	FALSE	FALSE	ukb-b-19425	2	57987593	0.000100946	463010	0.5	Diagnoses - main ICD10: C20 Malignant neoplasm of rectum || id:ukb-b-19425	Diagnoses - main ICD10: C20 Malignant neoplasm of rectum	Diagnoses - main ICD10: C20 Malignant neoplasm of rectum || ||	TRUE	igd	2	57987593	0.0109	1.58e-11	77096	ieu-b-42	schizophrenia || id:ieu-b-42	TRUE	reported	igd	2	TRUE	0.000589368	45.4635
rs11693094	T	C	T	C	-0.073603	0.000124237	0.429	0.464626	FALSE	FALSE	FALSE	ukb-b-19425	2	185601420	0.000100961	463010	0.22	Diagnoses - main ICD10: C20 Malignant neoplasm of rectum || id:ukb-b-19425	Diagnoses - main ICD10: C20 Malignant neoplasm of rectum	Diagnoses - main ICD10: C20 Malignant neoplasm of rectum || ||	TRUE	igd	2	185601420	0.011	2.17e-11	77096	ieu-b-42	schizophrenia || id:ieu-b-42	TRUE	reported	igd	2	TRUE	0.000580392	44.7708
rs11740474	T	A	T	A	0.062695	-0.000113187	0.412	0.417157	FALSE	TRUE	FALSE	ukb-b-19425	5	153680747	0.000102548	463010	0.27	Diagnoses - main ICD10: C20 Malignant neoplasm of rectum || id:ukb-b-19425	Diagnoses - main ICD10: C20 Malignant neoplasm of rectum	Diagnoses - main ICD10: C20 Malignant neoplasm of rectum || ||	TRUE	igd	5	153680747	0.0112	2e-08	77096	ieu-b-42	schizophrenia || id:ieu-b-42	TRUE	reported	igd	2	TRUE	0.000406276	31.3342
rs12691307	G	A	G	A	-0.071902	0.00017186	0.478	0.558565	FALSE	FALSE	FALSE	ukb-b-19425	16	29939877	0.000101155	463010	0.089	Diagnoses - main ICD10: C20 Malignant neoplasm of rectum || id:ukb-b-19425	Diagnoses - main ICD10: C20 Malignant neoplasm of rectum	Diagnoses - main ICD10: C20 Malignant neoplasm of rectum || ||	TRUE	igd	16	29939877	0.0113	2.03e-10	77096	ieu-b-42	schizophrenia || id:ieu-b-42	TRUE	reported	igd	2	TRUE	0.000524886	40.4868
rs12932476	G	C	G	C	-0.059702	1.45e-05	0.512	0.517955	FALSE	TRUE	TRUE	ukb-b-19425	16	63709630	0.000101079	463010	0.89	Diagnoses - main ICD10: C20 Malignant neoplasm of rectum || id:ukb-b-19425	Diagnoses - main ICD10: C20 Malignant neoplasm of rectum	Diagnoses - main ICD10: C20 Malignant neoplasm of rectum || ||	TRUE	igd	16	63709630	0.0109	4.62e-08	77096	ieu-b-42	schizophrenia || id:ieu-b-42	TRUE	reported	igd	2	FALSE	0.000388977	29.9995
rs13240464	C	T	C	T	-0.080704	-8.21e-05	0.379	0.332857	FALSE	FALSE	FALSE	ukb-b-19425	7	110898915	0.000106646	463010	0.44	Diagnoses - main ICD10: C20 Malignant neoplasm of rectum || id:ukb-b-19425	Diagnoses - main ICD10: C20 Malignant neoplasm of rectum	Diagnoses - main ICD10: C20 Malignant neoplasm of rectum || ||	TRUE	igd	7	110898915	0.0116	3.12e-12	77096	ieu-b-42	schizophrenia || id:ieu-b-42	TRUE	reported	igd	2	TRUE	0.000627436	48.402
rs13261481	G	T	G	T	-0.062402	6.49e-05	0.591	0.553564	FALSE	FALSE	FALSE	ukb-b-19425	8	60706091	0.000101144	463010	0.52	Diagnoses - main ICD10: C20 Malignant neoplasm of rectum || id:ukb-b-19425	Diagnoses - main ICD10: C20 Malignant neoplasm of rectum	Diagnoses - main ICD10: C20 Malignant neoplasm of rectum || ||	TRUE	igd	8	60701801	0.011	1.66e-08	77096	ieu-b-42	schizophrenia || id:ieu-b-42	TRUE	reported	igd	2	TRUE	0.000417252	32.1811
rs1339227	T	C	T	C	-0.063302	0.000136136	0.355	0.371586	FALSE	FALSE	FALSE	ukb-b-19425	6	73157926	0.000105311	463010	0.2	Diagnoses - main ICD10: C20 Malignant neoplasm of rectum || id:ukb-b-19425	Diagnoses - main ICD10: C20 Malignant neoplasm of rectum	Diagnoses - main ICD10: C20 Malignant neoplasm of rectum || ||	TRUE	igd	6	73155701	0.0114	3.06e-08	77096	ieu-b-42	schizophrenia || id:ieu-b-42	TRUE	reported	igd	2	TRUE	0.000399779	30.8329
rs1498232	C	T	C	T	-0.072004	-7.67e-06	0.697	0.660659	FALSE	FALSE	FALSE	ukb-b-19425	1	30434937	0.000106796	463010	0.94	Diagnoses - main ICD10: C20 Malignant neoplasm of rectum || id:ukb-b-19425	Diagnoses - main ICD10: C20 Malignant neoplasm of rectum	Diagnoses - main ICD10: C20 Malignant neoplasm of rectum || ||	TRUE	igd	1	30433951	0.0118	1.21e-09	77096	ieu-b-42	schizophrenia || id:ieu-b-42	TRUE	reported	igd	2	TRUE	0.000482734	37.2339
rs1509378	G	A	G	A	-0.0692	2.49e-05	0.646	0.675525	FALSE	FALSE	FALSE	ukb-b-19425	2	22754466	0.000107279	463010	0.82	Diagnoses - main ICD10: C20 Malignant neoplasm of rectum || id:ukb-b-19425	Diagnoses - main ICD10: C20 Malignant neoplasm of rectum	Diagnoses - main ICD10: C20 Malignant neoplasm of rectum || ||	TRUE	igd	2	22754466	0.0119	5.39e-09	77096	ieu-b-42	schizophrenia || id:ieu-b-42	TRUE	reported	igd	2	TRUE	0.000438426	33.8148
rs17108967	C	T	C	T	0.065296	0.00013372	0.343	0.337579	FALSE	FALSE	FALSE	ukb-b-19425	14	71542168	0.000106308	463010	0.21	Diagnoses - main ICD10: C20 Malignant neoplasm of rectum || id:ukb-b-19425	Diagnoses - main ICD10: C20 Malignant neoplasm of rectum	Diagnoses - main ICD10: C20 Malignant neoplasm of rectum || ||	TRUE	igd	14	71542168	0.0115	1.21e-08	77096	ieu-b-42	schizophrenia || id:ieu-b-42	TRUE	reported	igd	2	TRUE	0.000417988	32.2379
rs2103655	A	G	A	G	0.0766	-0.000175173	0.664	0.675845	FALSE	FALSE	FALSE	ukb-b-19425	20	37453194	0.000107352	463010	0.1	Diagnoses - main ICD10: C20 Malignant neoplasm of rectum || id:ukb-b-19425	Diagnoses - main ICD10: C20 Malignant neoplasm of rectum	Diagnoses - main ICD10: C20 Malignant neoplasm of rectum || ||	TRUE	igd	20	37425958	0.0119	1.24e-10	77096	ieu-b-42	schizophrenia || id:ieu-b-42	TRUE	reported	igd	2	TRUE	0.000537154	41.4336
rs215411	A	T	A	T	0.0692	0.00010598	0.327	0.325152	FALSE	TRUE	FALSE	ukb-b-19425	4	23423603	0.000107714	463010	0.33	Diagnoses - main ICD10: C20 Malignant neoplasm of rectum || id:ukb-b-19425	Diagnoses - main ICD10: C20 Malignant neoplasm of rectum	Diagnoses - main ICD10: C20 Malignant neoplasm of rectum || ||	TRUE	igd	4	23423603	0.0115	1.68e-09	77096	ieu-b-42	schizophrenia || id:ieu-b-42	TRUE	reported	igd	2	TRUE	0.000469441	36.2081
rs2414718	A	G	A	G	0.069797	2.89e-05	0.617	0.592427	FALSE	FALSE	FALSE	ukb-b-19425	15	61863133	0.000102356	463010	0.780001	Diagnoses - main ICD10: C20 Malignant neoplasm of rectum || id:ukb-b-19425	Diagnoses - main ICD10: C20 Malignant neoplasm of rectum	Diagnoses - main ICD10: C20 Malignant neoplasm of rectum || ||	TRUE	igd	15	61863133	0.011	1.98e-10	77096	ieu-b-42	schizophrenia || id:ieu-b-42	TRUE	reported	igd	2	TRUE	0.000521951	40.2603
rs2514218	T	C	T	C	-0.072205	0.000145002	0.327	0.356121	FALSE	FALSE	FALSE	ukb-b-19425	11	113392994	0.000105357	463010	0.17	Diagnoses - main ICD10: C20 Malignant neoplasm of rectum || id:ukb-b-19425	Diagnoses - main ICD10: C20 Malignant neoplasm of rectum	Diagnoses - main ICD10: C20 Malignant neoplasm of rectum || ||	TRUE	igd	11	113392994	0.0116	4.64e-10	77096	ieu-b-42	schizophrenia || id:ieu-b-42	TRUE	reported	igd	2	TRUE	0.000502306	38.7443
rs2535627	C	T	C	T	-0.070403	-1.61e-05	0.503	0.463422	FALSE	FALSE	FALSE	ukb-b-19425	3	52845105	0.000101105	463010	0.87	Diagnoses - main ICD10: C20 Malignant neoplasm of rectum || id:ukb-b-19425	Diagnoses - main ICD10: C20 Malignant neoplasm of rectum	Diagnoses - main ICD10: C20 Malignant neoplasm of rectum || ||	TRUE	igd	3	52845105	0.0109	1.17e-10	77096	ieu-b-42	schizophrenia || id:ieu-b-42	TRUE	reported	igd	2	TRUE	0.000540832	41.7175
rs2693698	G	A	G	A	0.061705	-0.000100353	0.551	0.542031	FALSE	FALSE	FALSE	ukb-b-19425	14	99719219	0.000101472	463010	0.32	Diagnoses - main ICD10: C20 Malignant neoplasm of rectum || id:ukb-b-19425	Diagnoses - main ICD10: C20 Malignant neoplasm of rectum	Diagnoses - main ICD10: C20 Malignant neoplasm of rectum || ||	TRUE	igd	14	99719219	0.0111	2.99e-08	77096	ieu-b-42	schizophrenia || id:ieu-b-42	TRUE	reported	igd	2	TRUE	0.000400672	30.9018
rs2905432	A	G	A	G	-0.066001	2.55e-05	0.671	0.648101	FALSE	FALSE	FALSE	ukb-b-19425	19	19484295	0.000105301	463010	0.81	Diagnoses - main ICD10: C20 Malignant neoplasm of rectum || id:ukb-b-19425	Diagnoses - main ICD10: C20 Malignant neoplasm of rectum	Diagnoses - main ICD10: C20 Malignant neoplasm of rectum || ||	TRUE	igd	19	19484295	0.0114	7.51e-09	77096	ieu-b-42	schizophrenia || id:ieu-b-42	TRUE	reported	igd	2	TRUE	0.000434581	33.5182
rs2909457	A	G	A	G	-0.059697	-0.000241202	0.574	0.535088	FALSE	FALSE	FALSE	ukb-b-19425	2	162845855	0.00010085	463010	0.017	Diagnoses - main ICD10: C20 Malignant neoplasm of rectum || id:ukb-b-19425	Diagnoses - main ICD10: C20 Malignant neoplasm of rectum	Diagnoses - main ICD10: C20 Malignant neoplasm of rectum || ||	TRUE	igd	2	162845855	0.0109	4.25e-08	77096	ieu-b-42	schizophrenia || id:ieu-b-42	TRUE	reported	igd	2	TRUE	0.000388912	29.9944
rs301797	A	C	A	C	0.066097	-2.04e-05	0.322	0.339848	FALSE	FALSE	FALSE	ukb-b-19425	1	8487323	0.000106195	463010	0.85	Diagnoses - main ICD10: C20 Malignant neoplasm of rectum || id:ukb-b-19425	Diagnoses - main ICD10: C20 Malignant neoplasm of rectum	Diagnoses - main ICD10: C20 Malignant neoplasm of rectum || ||	TRUE	igd	1	8487323	0.0116	1.2e-08	77096	ieu-b-42	schizophrenia || id:ieu-b-42	TRUE	reported	igd	2	TRUE	0.000420952	32.4666
rs35998080	T	G	T	G	0.069004	2.64e-05	0.45	0.426145	FALSE	FALSE	FALSE	ukb-b-19425	1	73278615	0.000102638	463010	0.8	Diagnoses - main ICD10: C20 Malignant neoplasm of rectum || id:ukb-b-19425	Diagnoses - main ICD10: C20 Malignant neoplasm of rectum	Diagnoses - main ICD10: C20 Malignant neoplasm of rectum || ||	TRUE	igd	1	73278615	0.0112	6.95e-10	77096	ieu-b-42	schizophrenia || id:ieu-b-42	TRUE	reported	igd	2	TRUE	0.000492115	37.9578
rs3798869	A	G	A	G	-0.066802	-2.17e-05	0.464	0.437297	FALSE	FALSE	FALSE	ukb-b-19425	6	84328660	0.000101333	463010	0.83	Diagnoses - main ICD10: C20 Malignant neoplasm of rectum || id:ukb-b-19425	Diagnoses - main ICD10: C20 Malignant neoplasm of rectum	Diagnoses - main ICD10: C20 Malignant neoplasm of rectum || ||	TRUE	igd	6	84328660	0.011	1.09e-09	77096	ieu-b-42	schizophrenia || id:ieu-b-42	TRUE	reported	igd	2	TRUE	0.000478139	36.8793
rs3849046	T	C	T	C	0.062496	0.000247329	0.508	0.53292	FALSE	FALSE	FALSE	ukb-b-19425	5	137851192	0.000102257	463010	0.016	Diagnoses - main ICD10: C20 Malignant neoplasm of rectum || id:ukb-b-19425	Diagnoses - main ICD10: C20 Malignant neoplasm of rectum	Diagnoses - main ICD10: C20 Malignant neoplasm of rectum || ||	TRUE	igd	5	137851192	0.0109	1.04e-08	77096	ieu-b-42	schizophrenia || id:ieu-b-42	TRUE	reported	igd	2	TRUE	0.000426221	32.8731
rs4129585	C	A	C	A	-0.079301	1.75e-06	0.558	0.560837	FALSE	FALSE	FALSE	ukb-b-19425	8	143312933	0.000101225	463010	0.99	Diagnoses - main ICD10: C20 Malignant neoplasm of rectum || id:ukb-b-19425	Diagnoses - main ICD10: C20 Malignant neoplasm of rectum	Diagnoses - main ICD10: C20 Malignant neoplasm of rectum || ||	TRUE	igd	8	143312933	0.0109	3.61e-13	77096	ieu-b-42	schizophrenia || id:ieu-b-42	TRUE	reported	igd	2	TRUE	0.000686079	52.9289
rs4391122	G	A	G	A	0.078005	-4.33e-05	0.462	0.501213	FALSE	FALSE	FALSE	ukb-b-19425	5	60598543	0.000101034	463010	0.67	Diagnoses - main ICD10: C20 Malignant neoplasm of rectum || id:ukb-b-19425	Diagnoses - main ICD10: C20 Malignant neoplasm of rectum	Diagnoses - main ICD10: C20 Malignant neoplasm of rectum || ||	TRUE	igd	5	60598543	0.0109	8.9e-13	77096	ieu-b-42	schizophrenia || id:ieu-b-42	TRUE	reported	igd	2	TRUE	0.000663853	51.213
rs4523957	T	G	T	G	0.069703	-1.27e-05	0.603	0.640921	FALSE	FALSE	FALSE	ukb-b-19425	17	2208899	0.00010515	463010	0.9	Diagnoses - main ICD10: C20 Malignant neoplasm of rectum || id:ukb-b-19425	Diagnoses - main ICD10: C20 Malignant neoplasm of rectum	Diagnoses - main ICD10: C20 Malignant neoplasm of rectum || ||	TRUE	igd	17	2208899	0.0115	1.4e-09	77096	ieu-b-42	schizophrenia || id:ieu-b-42	TRUE	reported	igd	2	TRUE	0.000476287	36.7363
rs4648845	T	C	T	C	0.067201	-6.86e-05	0.479	0.484314	FALSE	FALSE	FALSE	ukb-b-19425	1	2387101	0.000101093	463010	0.5	Diagnoses - main ICD10: C20 Malignant neoplasm of rectum || id:ukb-b-19425	Diagnoses - main ICD10: C20 Malignant neoplasm of rectum	Diagnoses - main ICD10: C20 Malignant neoplasm of rectum || ||	TRUE	igd	1	2387101	0.0119	1.74e-08	77096	ieu-b-42	schizophrenia || id:ieu-b-42	TRUE	reported	igd	2	TRUE	0.000413472	31.8894
rs4702	A	G	A	G	-0.080505	-3.29e-06	0.574	0.556445	FALSE	FALSE	FALSE	ukb-b-19425	15	91426560	0.000101137	463010	0.97	Diagnoses - main ICD10: C20 Malignant neoplasm of rectum || id:ukb-b-19425	Diagnoses - main ICD10: C20 Malignant neoplasm of rectum	Diagnoses - main ICD10: C20 Malignant neoplasm of rectum || ||	TRUE	igd	15	91426560	0.0115	2.62e-12	77096	ieu-b-42	schizophrenia || id:ieu-b-42	TRUE	reported	igd	2	TRUE	0.000635246	49.0048
rs4766428	T	C	T	C	0.069395	-0.000191942	0.459	0.431578	FALSE	FALSE	FALSE	ukb-b-19425	12	110723245	0.000101989	463010	0.0599998	Diagnoses - main ICD10: C20 Malignant neoplasm of rectum || id:ukb-b-19425	Diagnoses - main ICD10: C20 Malignant neoplasm of rectum	Diagnoses - main ICD10: C20 Malignant neoplasm of rectum || ||	TRUE	igd	12	110723245	0.0112	6.12e-10	77096	ieu-b-42	schizophrenia || id:ieu-b-42	TRUE	reported	igd	2	TRUE	0.000497705	38.3892
rs55775495	T	C	T	C	-0.068996	0.000103781	0.701	0.646736	FALSE	FALSE	FALSE	ukb-b-19425	2	198245965	0.000105304	463010	0.32	Diagnoses - main ICD10: C20 Malignant neoplasm of rectum || id:ukb-b-19425	Diagnoses - main ICD10: C20 Malignant neoplasm of rectum	Diagnoses - main ICD10: C20 Malignant neoplasm of rectum || ||	TRUE	igd	2	198245965	0.0114	1.56e-09	77096	ieu-b-42	schizophrenia || id:ieu-b-42	TRUE	reported	igd	2	TRUE	0.000474898	36.6292
rs58120505	C	T	C	T	-0.082197	-7.78e-05	0.412	0.434025	FALSE	FALSE	FALSE	ukb-b-19425	7	2029867	0.000101318	463010	0.44	Diagnoses - main ICD10: C20 Malignant neoplasm of rectum || id:ukb-b-19425	Diagnoses - main ICD10: C20 Malignant neoplasm of rectum	Diagnoses - main ICD10: C20 Malignant neoplasm of rectum || ||	TRUE	igd	7	2029867	0.0111	1.26e-13	77096	ieu-b-42	schizophrenia || id:ieu-b-42	TRUE	reported	igd	2	TRUE	0.000710764	54.8346
rs5995756	C	T	C	T	-0.072497	-4.33e-05	0.54	0.573317	FALSE	FALSE	FALSE	ukb-b-19425	22	40000313	0.000101803	463010	0.67	Diagnoses - main ICD10: C20 Malignant neoplasm of rectum || id:ukb-b-19425	Diagnoses - main ICD10: C20 Malignant neoplasm of rectum	Diagnoses - main ICD10: C20 Malignant neoplasm of rectum || ||	TRUE	igd	22	40000313	0.0109	2.91e-11	77096	ieu-b-42	schizophrenia || id:ieu-b-42	TRUE	reported	igd	2	TRUE	0.000573464	44.236
rs6439649	T	G	T	G	0.070999	-8.75e-05	0.562	0.601529	FALSE	FALSE	FALSE	ukb-b-19425	3	136371691	0.000102511	463010	0.39	Diagnoses - main ICD10: C20 Malignant neoplasm of rectum || id:ukb-b-19425	Diagnoses - main ICD10: C20 Malignant neoplasm of rectum	Diagnoses - main ICD10: C20 Malignant neoplasm of rectum || ||	TRUE	igd	3	136371691	0.0111	1.37e-10	77096	ieu-b-42	schizophrenia || id:ieu-b-42	TRUE	reported	igd	2	TRUE	0.000530391	40.9117
rs6704768	A	G	A	G	-0.0766	2.44e-06	0.529	0.569458	FALSE	FALSE	FALSE	ukb-b-19425	2	233592501	0.000101556	463010	0.98	Diagnoses - main ICD10: C20 Malignant neoplasm of rectum || id:ukb-b-19425	Diagnoses - main ICD10: C20 Malignant neoplasm of rectum	Diagnoses - main ICD10: C20 Malignant neoplasm of rectum || ||	TRUE	igd	2	233592501	0.0109	2.06e-12	77096	ieu-b-42	schizophrenia || id:ieu-b-42	TRUE	reported	igd	2	TRUE	0.000640169	49.3848
rs73191547	T	A	T	A	0.066899	2.29e-06	0.286	0.333102	FALSE	TRUE	FALSE	ukb-b-19425	8	10033425	0.000106727	463010	0.98	Diagnoses - main ICD10: C20 Malignant neoplasm of rectum || id:ukb-b-19425	Diagnoses - main ICD10: C20 Malignant neoplasm of rectum	Diagnoses - main ICD10: C20 Malignant neoplasm of rectum || ||	TRUE	igd	8	10033425	0.0115	6.13e-09	77096	ieu-b-42	schizophrenia || id:ieu-b-42	TRUE	reported	igd	2	TRUE	0.000438754	33.8402
rs75968099	T	C	T	C	0.080104	0.000155617	0.351	0.346275	FALSE	FALSE	FALSE	ukb-b-19425	3	36858583	0.000105971	463010	0.14	Diagnoses - main ICD10: C20 Malignant neoplasm of rectum || id:ukb-b-19425	Diagnoses - main ICD10: C20 Malignant neoplasm of rectum	Diagnoses - main ICD10: C20 Malignant neoplasm of rectum || ||	TRUE	igd	3	36858583	0.0114	2.31e-12	77096	ieu-b-42	schizophrenia || id:ieu-b-42	TRUE	reported	igd	2	TRUE	0.000640013	49.3728
rs7601312	G	A	G	A	0.058997	4.72e-05	0.484	0.482271	FALSE	FALSE	FALSE	ukb-b-19425	2	229320093	0.000100562	463010	0.64	Diagnoses - main ICD10: C20 Malignant neoplasm of rectum || id:ukb-b-19425	Diagnoses - main ICD10: C20 Malignant neoplasm of rectum	Diagnoses - main ICD10: C20 Malignant neoplasm of rectum || ||	TRUE	igd	2	229320093	0.0108	4.67e-08	77096	ieu-b-42	schizophrenia || id:ieu-b-42	TRUE	reported	igd	2	TRUE	0.000386912	29.8402
rs760648	A	G	A	G	0.075803	-9.75e-05	0.416	0.432744	FALSE	FALSE	FALSE	ukb-b-19425	22	42571028	0.000102126	463010	0.34	Diagnoses - main ICD10: C20 Malignant neoplasm of rectum || id:ukb-b-19425	Diagnoses - main ICD10: C20 Malignant neoplasm of rectum	Diagnoses - main ICD10: C20 Malignant neoplasm of rectum || ||	TRUE	igd	22	42571028	0.0118	1.27e-10	77096	ieu-b-42	schizophrenia || id:ieu-b-42	TRUE	reported	igd	2	TRUE	0.000534989	41.2665
rs783540	G	A	G	A	0.059899	7.87e-05	0.43	0.393659	FALSE	FALSE	FALSE	ukb-b-19425	15	83254708	0.000100418	463010	0.43	Diagnoses - main ICD10: C20 Malignant neoplasm of rectum || id:ukb-b-19425	Diagnoses - main ICD10: C20 Malignant neoplasm of rectum	Diagnoses - main ICD10: C20 Malignant neoplasm of rectum || ||	TRUE	igd	15	83254708	0.011	4.77e-08	77096	ieu-b-42	schizophrenia || id:ieu-b-42	TRUE	reported	igd	2	TRUE	0.000384463	29.6512
rs832190	T	C	T	C	-0.069897	-0.000162694	0.613	0.635385	FALSE	FALSE	FALSE	ukb-b-19425	3	63842629	0.000104709	463010	0.12	Diagnoses - main ICD10: C20 Malignant neoplasm of rectum || id:ukb-b-19425	Diagnoses - main ICD10: C20 Malignant neoplasm of rectum	Diagnoses - main ICD10: C20 Malignant neoplasm of rectum || ||	TRUE	igd	3	63842629	0.0113	5.73e-10	77096	ieu-b-42	schizophrenia || id:ieu-b-42	TRUE	reported	igd	2	TRUE	0.000496036	38.2603
rs9636107	G	A	G	A	0.079595	9.04e-05	0.497	0.470927	FALSE	FALSE	FALSE	ukb-b-19425	18	53200117	0.000100946	463010	0.37	Diagnoses - main ICD10: C20 Malignant neoplasm of rectum || id:ukb-b-19425	Diagnoses - main ICD10: C20 Malignant neoplasm of rectum	Diagnoses - main ICD10: C20 Malignant neoplasm of rectum || ||	TRUE	igd	18	53200117	0.0108	2.17e-13	77096	ieu-b-42	schizophrenia || id:ieu-b-42	TRUE	reported	igd	2	TRUE	0.000704022	54.3141

## Sheet: IVs detail
disease	Ivs number
Breast cancer	68
Ovarian cancer	77
Thyroid cancer	34
Pancreatic cancer	47
Neuroblastoma	43
Gallbladder cancer	41
Glioma	38
Lung cancer	68
Prostate cancer	81
Oral cavity and pharyngeal cancer	79
Secondary malignant neoplasm of liver	49
Colon cancer	55
Rectum cancer	48
