# Supplementary material for: Mendelian Randomization and GWAS Meta Analysis Revealed the Risk-Increasing Effect of Schizophrenia on Cancers
Source: Biology (Basel). 2022 Sep 12;11(9):1345. doi: 10.3390/biology11091345 (PMC9495962; doi:10.3390/biology11091345)
Supplement: Supplementary file 1 [file biology-11-01345-s001.zip › Table S3 all cancer and scz mR.xlsx]

## Sheet: Sheet1
Table S3. 2SMR results of all cancers and SCZ
Datasets num	Cancer name	Samples size	MR results（IVW-pvalue）	FDR	Heterogeneity statistics	OR(95% CI)
ieu-a-1126	Breast cancer	228951	0.1205	0.422	4.96008e-25	1.0462（0.9882-1.108)
ieu-a-1120	Ovarian cancer	66450	0.2664	0.466	0.120863	0.951(0.870-1.039)
ieu-a-1082	Thyroid cancer	1080	0.341	0.477	2.11558e-18	1.0006(0.9993-1.002 )
ieu-a-822	Pancreatic cancer	3835	NA	NA	NA	NA
ieu-a-816	Neuroblastoma	4881	0.259	0.466	0.557505	0.977(0.938 - 1.017)
ieu-a-1057	Gallbladder cancer	907	NA	NA	NA	NA
ieu-a-1013	Glioma	6811	0.0305	0.214	0.266861	1.056(1.005-1.109)
ieu-a-966	Lung cancer	27209	0.8667	0.867	1.17719e-20	1.026(0.758 - 1.389)
ieu-b-85	Prostate cancer	unkown	0.5231	0.61	1.22421e-05	0.988(0.954 - 1.024)
ieu-b-90	Oral cavity and pharyngeal cancer	4671	NA	NA	NA	NA
ukb-b-16713	Secondary malignant neoplasm of liver	463010	NA	NA	NA	NA
ukb-b-20145	Colon cancer	462933	NA	NA	NA	NA
ukb-b-19425	Rectum cancer	463010	NA	NA	NA	NA
