# Supplementary material for: Mendelian Randomization and GWAS Meta Analysis Revealed the Risk-Increasing Effect of Schizophrenia on Cancers
Source: Biology (Basel). 2022 Sep 12;11(9):1345. doi: 10.3390/biology11091345 (PMC9495962; doi:10.3390/biology11091345)
Supplement: Supplementary file 1 [file biology-11-01345-s001.zip › Table S4 scz and brca MR.xlsx]

## Sheet: Sheet1
Table S4. 2SMR results of SCZ and 2 subtypes breast
Datasets num	Cancer name	before MRPRESSO processing MR results（IVW）	before MRPRESSO processing Heterogeneity statistics	after MRPRESSO processing MR results（IVW-pvalue）	FDR	after MRPRESSO processing Heterogeneity statistics	after MRPRESSO processing OR(95%CI)
ieu-a-1127	ER+ Breast cancer (Combined Oncoarray; iCOGS; GWAS meta analysis)	0.0013	1.387e-14	0.025	0.025	0.121	1.035(1.004-1.067)
ieu-a-1128	ER- Breast cancer (Combined Oncoarray; iCOGS; GWAS meta analysis)	0.018	0.00017	0.003	0.006	0.054	1.071(1.022-1.12)
