# Supplementary material for: Mendelian Randomization and GWAS Meta Analysis Revealed the Risk-Increasing Effect of Schizophrenia on Cancers
Source: Biology (Basel). 2022 Sep 12;11(9):1345. doi: 10.3390/biology11091345 (PMC9495962; doi:10.3390/biology11091345)
Supplement: Supplementary file 1 [file biology-11-01345-s001.zip › Table S5 scz and other type cancers mr.xlsx]

## Sheet: Sheet1
Table S5. 2SMR results of SCZ and different type cancers
Datasets num	Cancer name	sample size	MR results（IVW_pvalue）	FDR	Heterogeneity statistics	OR（95%CI）
UKB-b-8837	Basal cell carcinoma	462933	0.7346	0.735	0.0138	1.0001(0.999-1.0008)
Ieu-a-965	Lung adenocarcinoma	18336	0.3896	0.519	1.75e-12	1.060(0.928-1.210)
Ieu-a-967	Squamous cell lung cancer	18313	0.29	0.519	1.75e-12	1.087(0.931-1.268)
UKB-a-60	squamous cell carcinoma	337159	0.04448	0.178	0.5503	1.0003(1.000007-1.000566)
